# SUBJECT INDEX

## A

**Absorbers.** *See under Equipment*

**Acid—base equilibrium**

**acidosis**

metabolic, acute, in fetal lamb following maternal labetalol administration [Yeleswaram, Rurak, Hall, McMorland, Axelson], A1076

**alkalosis**

extracellular, injury of cortical neurons due to oxygen-glucose deprivation exacerbated by, *In Vitro* [Giffard, Choi], A611

**metabolic**

acidosis, acute, in fetal lamb following maternal labetalol administration [Yeleswaram, Rurak, Hall, McMorland, Axelson], A1076

**pH**

intracellular, in C fibers, halothane inhibits regulation of [Kracke, Mills, Drake], A597

sodium bicarbonate improves cardiac resuscitability, 24 hour survival and neurological outcome after ten minutes of cardiac arrest in dogs [Bircher], A246

**Acidosis.** *See under Acid—base equilibrium*

**Acupuncture**

P6, droperidol and vomiting after pediatric strabismus repair [Yentis, Bissonnette], A3

**Adenosine.** *See under Anesthetic techniques, hypotensive; Pharmacology*

**Adenosine triphosphate.** *See under Metabolism*

**Adrenal hormones.** *See under Hormones*

**Adrenergic receptors.** *See under Receptors*

**Adrenocorticotrophic hormones.** *See under Hormones*

**Age factors**

age-related differences in kinetics of deoxygenation during deep hypothermic circulatory arrest [Steven, Kurth, Phoon, Nicolson, Chance], A969

ASA physical status and, predict morbidity following three surgical procedures [Cullen, Cleary, Guadagnoli, Chittenden], A872

cerebral microvascular effects of fentanyl, sufentanil, and alfentanil in piglets [Monitto, Kurth], A542

children, during N<sub>2</sub>O-halothane anesthesia, neuromuscular blockade following ORG 9426 in [O'Kelly, Frossard, Meistelman, O'Kelly, Frossard, Meistelman, Ecoffey], A787

comparison between kittens and adult cats: differential sensitivity to halothane anesthesia of genioglossus, intercostals, and diaphragm [Ochiai, Guthrie, Motoyama], A925

elderly, histamine release following atracurium in [Shorten, Goudsouzian, Ali], A782

elderly surgical patients, pharmacokinetics and pharmacodynamics of ORG 9426 in [Matteo, Ornstein, Schwartz, Stone, Ostapkovich, Spencer, Dee], A1065

infants, children, and adults, pharmacokinetics of pipecuronium in [Tassonyi, Pittet, Schopfer, Gemperle, Rouge, Morel], A777

infants, dose-response relationship of mivacurium chloride in, during nitrous oxide-halothane anesthesia [Woelfel, Bandom, McGowan, Cook], A775

kinetic estimates of volumes and perfusions for volatile anesthetics in humans affected by [Strum, Eger, Unadkat, Johnson, Carpenter], A375

neonatal rat cardiomyocytes, effect of fentanyl on ANP secretion in [Mekhail, Doss, Estafanous, Khairallah], A328

newborn lambs, peripheral and cerebral hemodynamic effects of epidural anesthesia in [Yaster, Koehler, Traystman], A918

pediatric patients, transtracheal Doppler in, effects of growth on measurements [Saeki, Namba, Nakayama, Tokioka, Morita, Hirakawa], A459

propofol *versus*, pharmacokinetics of [Dyck, Varvel, Hung, Shafer], A315

transdermal fentanyl and, pharmacokinetics of [Esteve, Levron, Flaisler, Schoefler, Duvaldestin, Chauvin], A705

**Air embolism.** *See under Embolism*

**Airway.** *See also under Equipment*

**resistance**

airway reactivity and neuronal M2 muscarinic receptors [Okanlami, Hirshman, Fryer], A978

altered  $\beta$ -adrenergic cholinergic interaction in airways of basenji-greyhound dogs [Curry, Emala, Black, Hirshman], A976

following atracurium, is due to histamine release [Mehr, Lindeman, Hirshman], A974

mechanism of action of amrinone on airways [Lenox, Sauder, Grayson, Tobias, Hirshman], A977

mechanism of glucocorticoids in peripheral airways [Lindeman, Hirshman], A975

nedocromil attenuates constriction in peripheral airways [Downey, Lindeman, Hirshman], A979

**Airway pressure.** *See under Ventilation*

**Albumin.** *See under Pharmacology*

**Alcohol**

effect of acetone and, on 3.3NM infrared anesthetic agent monitors [Volgyesi, Crawford], A488

effects of, on spinal cord protein kinase [Austin, Firestone], A1041

effects of ethanol: photoacoustic spectroscopy [Alphin, Guyton], A419

**ethanol**

effect of, on MAC of halothane in humans [Slee, Cullen, Unadkat, Pavlin], A332

**Alfentanil.** *See under Analgesics; Anesthetics, intravenous*

**Algesimeter.** *See under Pain*

**Alkalosis.** *See under Acid—base equilibrium*

**Allergy**

latex, anaphylaxis on induction of anesthesia associated with [Setlock, Kelly], A1043

**Almitrine.** *See under Pharmacology*

**Alpha-adrenergic agonists.** *See under Sympathetic nervous system*

Alpha-adrenergic receptors. *See under* Sympathetic nervous system

ε-Aminocaproic acid. *See under* Blood

Amiodarone. *See under* Pharmacology

Ampules. *See under* Equipment

Amrinone. *See under* Pharmacology

**Analgesia**

contrasting action of intrathecal Kappa agonist (U50-488H) in visceral pain processing as compared to morphine and clonidine [Harada, Nishioka, Kitahata, Collins], A663

effects of subanesthetic xenon compared with nitrous oxide [Yagi, Mashimo, Kawaguchi, Pak, Yoshiya], A342

hydroxy-propyl-β-cyclodextrin as spinal drug delivery vehicle, systemic studies on use of: opioid analgesia in rats [Jang, Yaksh, Hill], A376

intracisternal, methadone and hydromorphone in [Brooks, Gupta], A722

intra-dermal bradykinin induces pain and hyperalgesia in humans [Manning, Raja, Meyuer, Campbell], A699

**measurement**

single escalating doses of G187084B administered intravenously, analgesic efficacy of, in healthy adult male volunteers [Marton, Hardman, Kamiyama, Donn, Glass], A378

**postoperative**

3-in-1 block for, following anterior cruciate ligament reconstruction [Bingham, Indelicato, Duke, Merrell], A735

after abdominal hysterectomy, transdermal fentanyl for [Reinhart, Hiller, Tyson, Zane, Mullins, Duke, Giesecke], A910

abdominal surgery pain management, double-blind comparison of epidural fentanyl and sufentanil with intravenous sufentanil for [Chrubasik, Geller, Graf, Zbinden, Thomson], A752

clonidine IV equally effective as morphine IV for: double-blind study [Tryba, Zenz, Strumpf], A1085

comparison of epidural clonidine and bupivacaine for [Carabine, Milligan, Moore], A1083

continuous epidural *versus* intravenous patient controlled: vital capacity after thoracotomy [Vanhoorebeeck, Vertommen, Van Aken, Vandermeersch], A116

continuous infusion of low-dose morphine for postoperative analgesia in children [Taylor, Boswell], A937

controlled, in morphine patient, enhanced by intraoperative clonidine [Dekock, Pichon, Scholtes], A654

effect of diclofenac sodium on post-laparoscopy pain [Gillberg, Harsten, Stahl], A21

effect of intraoperative ketorolac on recovery after outpatient laparoscopy [DeLucia, White], A14

effect of ketorolac on postoperative narcotic requirements of gynecological surgery outpatients [Prados, Blaylock], A6

effect of thoracic epidural anesthesia on pulmonary function in normals [Speight, Rauck, Mann], A729

effects of night-time opioid infusion on requirement [Parker, Holtmann, White], A676

efficacy of ketorolac 15 mg or 30 mg in combination with morphine PCA in postoperative gynecological surgery patients [Sevarino, Ning, Sinatra, Silverman, Brull], A1090

efficacy of two doses of transdermal fentanyl as assessed by IV PCA morphine for, following intra-abdominal gynecological surgery [Sevarino, Naulty, Sinatra, Conry, Silverman], A706

epidural, for chronic cancer patients taking oral narcotics [de Leon-Casasola, Myers, Donaparthi, Bacon, Peppriell, Rempel, Lema], A665

epidural, patient-controlled, pharmacokinetic profiles under morphine, methadone, fentanyl, and sufentanil [Chrubasik, Chrubasik, Magora], A753

epidural, using bupivacaine and opioid *versus* subcutaneous morphine: pulmonary complications after abdominal surgery [Farhat, Thomas, Rey, Bourgain, Desruennes, Jayr], A126

epidural anesthesia/analgesia *versus* general anesthesia/patient-controlled analgesia: endocrine response to surgical stress [Norris, Parker, Breslow, Crowley, Frank, Rock, Christopherson, Beattie], A696

epidural clonidine reduces epidural fentanyl requirements and side effects in [Delaunay, Leppert, Dechaubry, Baubillier, Bonnet], A1086

epidural fentanyl and PCA morphine in post-thoracotomy pain, double-blind comparison of [Benzon, Wong, Belavic, Locicero], A712

epidural narcotics do not delay return of bowel function following major colon surgery [Hart, Faul, Buhman], A669

epidural opiates for, in pediatric patients: morphine *versus* fentanyl [Lejus, Roussiere, Testa, Ganansia, Ricard], A941

epidural *versus* intravenous alfentanil by PCA in [Hongnat, Bellenfant, Levy, Alfonsi, Chauvin], A754

evaluation for, following gynecological surgery: new fentanyl transdermal delivery system [Freedman, Kreitzer, Atlin, Eisenkraft, Sebel], A708

failure of ketorolac to prevent severe postoperative pain following laparoscopy [Pandit, Kothary Lebendom-Mansour, Levy, Randel, Mathai], A33

intra-articular morphine or bupivacaine following arthroscopic knee surgery efficacy of [Heard, Edwards, Ferrari, Hanna, Willock], A670

intranasal fentanyl titration for [Striebel, Gottschalk, Kramer], A671

intrathecal morphine and fentanyl with and without bupivacaine for, after major abdominal surgery [Gwirtz, Peneff], A672

intravenous *versus* epidural fentanyl: stress response after thoracotomy [Mavrocordatos, Guinard, Chiolero], A697

is postthoracotomy pain syndrome affected by technique for? [Miguel, Hubbell], A763

low dose epidural morphine, proglumide potentiates analgesic effect of [Chen, Tsai, Mok, Lippmann], A686

lumbar epidural fentanyl reduces pain following thoracic surgery, pre-incisional *versus* post-incisional: randomized double-blind crossover study [Kavanagh, Katz, Sandler, Nierenberg, Panos], A1087

after major orthopedic surgery: transdermal fentanyl delivery system *versus* morphine IM: [Boerner, Bell, Bartkowski, Torjman, Lessin, Marr], A709

management of pediatric anti-reflux surgery, comparison of epidural opioids and intravenous opioids in [McNeely], A689

meperidine requirements not reduced by clonidine [Striebel, Gottschalk, Kramer], A659

morphine consumption, effects of anesthetic technique on [Samra, Willis, Ganta, Pundit], A666

nalbuphine ameliorates pruritus caused by continuous epidural bupivacaine-fentanyl in [Newman, Dragisic, Lubenow, McCarthy, Ivankovich], A770

nurse-controlled *versus* patient-controlled, following pediatric scoliosis surgery [Weldon, Connor, White], A935

opioid requirement and recovery profile, effect of ketorolac on [Parker, Holtmann, White], A758

patient-controlled *versus* epidural, with morphine or bupivacaine/morphine: postoperative outcome after abdominal surgery [Rockemann, Seeling, Bothner, Eifert, Zeininger], A1088

pediatric patient-controlled, with morphine *versus* meperidine [Vetter], A692

plasma and lung lymph, interpleural bupivacaine in, pharmacokinetics of [Suresh, Johnston, Traber, Traber, Arens], A756

postcesarean, combination of low dose epidural morphine and intramuscular diclofenac sodium for [Sun, Wu, Lin, Chang, Mok], A745

post-cesarean delivery, epidural *versus* intravenous butorphanol for [Loferski, Camann, Stone, Datta], A848

post-hysterectomy, transdermal fentanyl for, double-blind placebo-controlled trial of [Sandler, Baxter, Norman, Samson, Friedlander], A707

postthoracotomy pain relief: does technique really make a difference? [Miguel, Hubbell], A1091

potency and action site of epidural fentanyl, following gastrectomy [Inagaki, Mashimo, Yoshiya], A47

potentiated by addition of droperidol to PCA monitoring sulfate [Freedman, Kreitzer, Atlin, Reuben, Eisenkraft], A668

route of PCA affects incidence of urinary retention following orthopedic surgery [Prados, Renfro], A751

thoracic epidural fentanyl after thoracotomy, shorter hospital stay with [Guinard, Mavrocordatos, Cuttat, Chiolero], A698

**Analgesics**

**alfentanil**

acute tolerance with, evidence for rapid onset of [Hiestand, Howie, Romanelli, Jopling, Rezaei, McSweeney], A322

effects of, on cardiovascular and hormonal stress response to tracheal intubation [Miller, O'Brien, Martineau, Abou-Hamad, Hull, Greenway, Hindmarsh], A82

effects of disease on protein binding [Stiller, Davis, Cook, McGowan], A963

hemodynamic effects and postoperative respiratory depression of, in outpatient surgery [Cheng, Chapman, Chung, Ong, Romanelli], A24

pharmacokinetic comparison of G187084B, novel ultra-short acting opioid, and [Hermann, Marton, Donn, Grosse, Hardman, Kamiyama, Glass], A379

pharmacokinetics and pharmacodynamics of, influence of Crohn's disease on [Gesink-van der Veer, Burm, Vletter], A327

ventilation and ventilatory depression produced by, effect of clonidine on, in volunteers [Jarvis, Duncan, Segal, Maze], A982

ventilatory depression induced by, not affected by ondansetron [Dershwitz, Di Biase, Rosow, Wilson], A321

vomiting after, effect of dosing method [Okum, Colonna-Romano, Horrow], A2

**brifentanyl**

respiratory sensitivity to hypoxia and hypercapnia after [Cigada, Afifi, Glass, Esposito, Camporesi], A1097

**buprenorphine**

pretreatment, time dependent cocaine-induced increase in plasma LDH activity decreased by [Shukla, Bansinath, Goldfrank, Turndorf], A626

**fentanyl**

assessing and characterizing hypnotic and analgesic effects of anesthetic drugs [Fukunaga, Fukunaga, Kikuta], A45

with bupivacaine and neonatal effects [Loftus, Hill, Cohen], A856

and bupivacaine mixture, stability of [Dawson, Bjorksten, Duncan, Barnes, Hellyar], A746

comparison of meperidine, sufentanil and, for intrathecal labor analgesia [Honet, Arkoosh, Huffnagle, Norris, Leighton], A839

dexmedetomidine and, anesthetic and hemodynamic interactions of, in dogs [Salmenpera, Szlam, Hug], A307

effect of, on ANP secretion in neonatal rat cardiomyocytes [Mekhail, Doss, Estafanous, Khairallah], A328

effect of, on ICP and CBF in rabbits with acute cryogenic brain injury [Sheehan, Scheller, Zornow, Peterson], A618

epidural, compared with intravenous sufentanil for abdominal surgery pain management [Chrubasik, Geller, Graf, Zbinden, Thomson], A752

epidural, does not worsen post-cesarean section analgesia when administered before epidural morphine [Vincent, Chestnut, Choi, Coffin, Ostman, Bates, Laszewski], A861

epidural compared with intravenous, reduction of halothane MAC by [Inagaki, Mashimo, Yoshiya], A323

epidural patient-controlled analgesia, pharmacokinetic profile under [Chrubasik, Chrubasik, Magora], A753

hemodynamic effects and postoperative respiratory depression of, in outpatient surgery [Cheng, Chapman, Chung, Ong, Romanelli], A24

intranasal titration, for postoperative pain management [Striebel, Gotschalk, Kramer], A671

intrathecal, comparison between sufentanil and, for labor analgesia, [Sharkey, Arkoosh, Norris, Honet, Leighton], A841

intrathecal, does not improve intrathecal morphine analgesia after cesarean section [Boerner, Norris, Leighton, Arkoosh, Torjman], A858

intrathecal, for labor analgesia [Zakowski, Goldstein, Ramanathan, Turndorf], A840

intrathecal, with and without bupivacaine, for control of postoperative pain after major abdominal surgery [Gwirtz, Peneff], A672

modifications of resistive properties of respiratory system induced by, effect of PEEP on [Cohendy, Lefrant, Laracine, Rebiere, Eledjam], A132

oral transmucosal fentanyl citrate for procedures in children, safety and efficacy of [Conard, Rosenblum, Weisman, Schecter, Bartolotta, Altman, Quinn], A954

pharmacokinetics of, in congestive heart failure [Norgaard, Pineda, McGlinch, Zimmerman, Estrin], A325

reduction of isoflurane by [McEwan, Smith, Dyar, Goodman, Glass], A43

significantly increases ICP, in resuscitated head trauma patients [Bailey, Sperry, Reichman, Peterson, Petersen, Pace, Stanley], A198

transdermal, bioavailability and absorption rate of, [Fiset, Haack, Shafer], A326

transdermal, efficacy of two doses of, as assessed by IV PCA morphine for postoperative analgesia following intra-abdominal gynecological surgery [Sevarino, Naulty, Sinatra, Conry, Silverman], A706

transdermal, for post-hysterectomy analgesia, double-blind placebo-controlled trial of [Sandler, Baxter, Norman, Samson, Friedlander], A707

transdermal, for postoperative pain relief after abdominal hysterectomy [Reinhart, Hiller, Tyson, Zane, Mullins, Duke, Giesecke], A910

transdermal, new delivery system for: evaluation for pain relief following gynecological surgery [Freedman, Kreitzer, Atlin, Eisenkraft, Sebel], A708

transdermal, pharmacokinetics of, aging and [Esteve, Levron, Flaisler, Schoefler, Duvaldestin, Chauvin], A705

transdermal delivery system, respiratory effects of, compared to fixed interval IM morphine following spinal surgery [Torjman, Bartkowski, Marr, Lessin, Boerner], A1101

transdermal delivery system *versus* morphine IM: comparison of analgesia after major orthopedic surgery [Boerner, Bell, Bartkowski, Torjman, Lessin, Marr], A709

transfer of, across arterial walls [Bernards, Hill], A685

**G187084B**

pharmacokinetic comparison of alfentanil, novel ultra-short acting opioid, and [Hermann, Marton, Donn, Grosse, Hardman, Kamiyama, Glass], A379

**hydromorphone**

- in intracisternal analgesia [Brooks, Gupta], A722
- is there relationship between controlled substance accountability and controlled substance abuse? [Klein, Stevens, Kingston], A881

**ketorolac**

- efficacy of, in combination with morphine PCA in postoperative gynecological surgery patients [Sevarino, Ning, Sinatra, Silverman, Brull], A1090

**meperidine**

- comparison of fentanyl, sufentanil and, for intrathecal labor analgesia [Honet, Arkoosh, Huffnagle, Norris, Leighton], A839
- intrathecal, associated with bupivacaine: dose-range study [Bonnet, Nguyen Thi, Oriaguet, Liu, Delaunay], A747

**methadone**

- epidural patient-controlled analgesia, pharmacokinetic profile under [Chrubasik, Chrubasik, Magora], A753
- in intracisternal analgesia [Brooks, Gupta], A722
- long-term therapy for chronic pain patients [Wan Lu, Urban, France], A719

**morphine**

- epidurally [Rattan, McDonald, Tejwani], A760
- assessing and characterizing hypnotic and analgesic effects of anesthetic drugs [Fukunaga, Fukunaga, Kikuta], A45
- comparison of therapeutic margins of sufentanil and, during steady-state infusions in volunteers [Coda, Hill, Bernards, Luger, Hautman, Shields], A673
- efficacy of ketorolac 15 mg or 30 mg in combination with, in postoperative gynecological surgery patients [Sevarino, Ning, Sinatra, Silverman, Brull], A1090
- epidural, epidural fentanyl administered before, does not worsen post-cesarean section analgesia [Vincent, Chestnut, Choi, Coffin, Osman, Bates, Laszewski], A861
- epidural patient-controlled analgesia, pharmacokinetic profile under [Chrubasik, Chrubasik, Magora], A753
- fixed interval IM, compared to respiratory effects of fentanyl transdermal delivery system, following spinal surgery [Torjman, Bartkowski, Marr, Lessin, Boerner], A1101
- IM, transdermal fentanyl delivery system *versus*: comparison of analgesia after major orthopedic surgery [Boerner, Bell, Bartkowski, Torjman, Lessin, Marr], A709
- intrathecal, not improved by intrathecal fentanyl, after cesarean section [Boerner, Norris, Leighton, Arkoosh, Torjman], A858
- intrathecal, with and without bupivacaine, for control of postoperative pain after major abdominal surgery [Gwitz, Peneff], A672
- IV infusion, respiratory effects of, in infants and toddlers following cardiac surgery [Lynn, Opheim, Nespeca, Slatery], A952
- transfer of, across arterial walls [Bernards, Hill], A685

**nalbuphine**

- hemodynamic effects and postoperative respiratory depression of, in outpatient surgery [Cheng, Chapman, Chung, Ong, Romanelli], A24
- progesterone-mediated potentiation of spinal opiates [Carp, Jayaram], A838

**sufentanil**

- assessing and characterizing hypnotic and analgesic effects of anesthetic drugs [Fukunaga, Fukunaga, Kikuta], A45
- with bupivacaine and neonatal effects [Loftus, Hill, Cohen], A856
- comparison of fentanyl, meperidine and, for intrathecal labor analgesia [Honet, Arkoosh, Huffnagle, Norris, Leighton], A839
- comparison of therapeutic margins of morphine and, during steady-state infusions in volunteers [Coda, Hill, Bernards, Luger, Hautman, Shields], A673

- effect of, on ICP and CBF in rabbits with acute cryogenic brain injury [Sheehan, Scheller, Zornow, Peterson], A618
- epidural, compared with intravenous sufentanil for abdominal surgery pain management [Chrubasik, Geller, Graf, Zbinden, Thomson], A752
- epidural, does it spread rostrally in spinal axis? [Petty, Stevens, Hill, Hahn, Kao], A744
- epidural administration during labor and delivery, maternal and neonatal plasma levels after [Kick, Vertommen, van Aken, Gryseels], A837
- epidural patient-controlled analgesia, pharmacokinetic profile under [Chrubasik, Chrubasik, Magora], A753
- intrathecal, comparison between fentanyl and, for labor analgesia, [Sharkey, Arkoosh, Norris, Honet, Leighton], A841
- intrathecal sufentanil/tetracaine for cesarean section surgery [Pan, Mok], A743
- significantly increases ICP, in resuscitated head trauma patients [Bailey, Sperry, Reichman, Peterson, Petersen, Pace, Stanley], A198

**tolerance**

- acute, with alfentanil, evidence for rapid onset of [Hiestand, Howie, Romanelli, Jopling, Rezaei, McSweeney], A322

**Anatomy**

- cranial nerves IX and X: anatomic study [Woods, Lee, Reikersdorfer, Lander], A742

**peridural space**

- new look at lumbar epidural anatomy [Hogan], A716

**Anemia. See under Blood****Anesthesia****biliary tract surgery**

- cholecystectomy, laparoscopy allows for reduction of acute phase reaction developing after [Joris, Cigarini, Legrand, Franchimont, De Groote Lamy], A229
- laparoscopic cholecystectomy, diaphragm function and pulmonary complications after [Sha, Ohmura, Yamada], A255
- laparoscopic cholecystectomy, dynamic respiratory patterns after [Shulman, Chuter, Weissman], A136
- laparoscopic cholecystectomy, effect of nitrous oxide on surgical conditions during [Taylor, Feinstein, Soper, White], A330
- laparoscopic cholecystectomy, postoperative pulmonary function deterioration prevented by? [Reed, Han, Sampson], A127
- pain and pulmonary dysfunction after cholecystectomy under laparoscopy and laparotomy [Cigarini, Joris, Jacquet, Lamy], A122
- postoperative lung function and stress response after laparoscopic cholecystectomy [Rademaker, deWit, Ringers, Odoom], A123
- ventilatory effects of C Q insufflation during laparoscopic cholecystectomy [Joris, Ledoux, Honore, Lamy], A121

**cardiovascular**

- $\beta$ -adrenergic receptor desensitization during cardiopulmonary bypass [Schwinn, Leone, Chestnut, Spahn, Page, Liggett], A1119
- aeric microemboli and transcranial Doppler: episodic frequency and timing in open heart surgery [Albin, Hantler, Mittel, Bunegin, Grover], A53
- amrinone in children after Fontan procedure for repair of complex cyanotic congenital heart disease, hemodynamic effects of [Sorensen, Lynn, Stevenson, French], A961
- anesthetic morbidity in congenital heart disease patients undergoing outpatient surgery [Strafford, Henderson], A866
- antegrade *versus* retrograde cardioplegia: influence on right ventricular function [Amory, Wanger, Weinstein], A150
- assessment of microembolization during cardiopulmonary bypass by transesophageal echocardiography [Calalang, Shapiro, Schwartz, Queeno, Shah, Hick, Meltzer], A64

- association between blood glucose level during cardiopulmonary bypass and neuropsychiatric outcome [Frasco, Croughwell, Blumenthal, Will, Leone, White, Goodman, Reves], A55
- cardiopulmonary bypass, does low-dose aprotinin reduce blood loss following? [Benmosbah, Madi, Castel, Kiefer, Cousin], A983
- cardiopulmonary bypass, modification of hemostatic parameters during: effects of high-dose aprotinin [Gardaz, Hauert, Chassot, Parise, Bernath, Bachmann], A991
- cerebral blood flow velocity is coupled to EEG activity during hypothermic cardiopulmonary bypass [Walker, Isley, Lucas, Kafer], A177
- cerebral perfusion absent during extremes of low-flow cardiopulmonary bypass [Burrows, Bissonnette], A947
- clonidine, reduction of catecholamine response to CABG surgery by [Hiestand, Howie, Romanelli, Jopling, Rezaei, McSweeney], A153
- coagulation defects in neonates during CPB [Kern, Morana, Sears, Hickey], A63
- comparison of propofol to ketamine for, in pediatric cardiac catheterization patients [Lebovic, Reich, Steinberg, Rossi, Vela, Silvay], A956
- coronary artery bypass graft surgery, comparative risk *versus* sufentanil anesthesia in: desflurane anesthesia and myocardial ischemia [Helman, Leung, Bellows, Pineda, Mangano, SPI Research Group], A1124
- corrective operations in infants and children with congenital heart defects, metabolic effects of [Puhakka, Rasanen, Leijala, Peltola], A965
- CPB induces increased leukocyte adhesion receptors but not TNF- $\alpha$  [Rinder, Mathew, Bonan, Hines, Smith], A59
- deep hypothermic circulatory arrest, age-related differences in kinetics of deoxygenation during [Steven, Kurth, Phoon, Nicolson, Chance], A969
- direct assessment of myocardial retrograde cardioplegia distribution during cardiac surgery [Aronson, Lee, Walker, Wiencsek, Feinstein, Bilotta, Karp, Roizen], A68
- does anesthetic technique affect hemostasis after cardiac surgery? [Salmenpera, Kuitunen, Hynynen, Heinonen, Fyhrquist], A74
- does fiberoptic bundle design affect clinical accuracy of mixed-venous saturation catheters? [Durkan, Turner], A412
- effect of mannitol on renal function during coronary artery bypass [Gehr, Gehr, Yoch, Nakatsuka, Wolman], A67
- effects of protamine on ACT and antithrombin III-heparin complex during cardiac surgery [Inada, Aoki, Kohama, Aoki, Takanashi, Iwashita, Furuta], A78
- endothelin levels in patients requiring blood pressure reduction following cardiopulmonary bypass [Lawhorn, Nelson, Lonergan, Hudson], A50
- fibrin formation during CPB with and without circulatory arrest in operations of congenital heart diseases [Dietrich, Spannagl, Mossinger, Richter], A76
- highly elevated plasma histamine during cardiac surgery [Alston], A60
- influence of aprotinin on coagulation patterns and blood loss in infants undergoing surgery for congenital heart defects [Mossinger, Dietrich, Spannagl, Jochum, Richter], A77
- inhaled nitric oxide in pulmonary hypertension following mitral valve replacement [Girard, Lehot, Clerc, Ffrench, Estanove], A984
- is supplemental O<sub>2</sub> beneficial to premedicated patients prior to CABG surgery? [Kavanagh, Cheng, Sandler, Lawson, Chung], A104
- IV morphine infusion in infants and toddlers following cardiac surgery, respiratory effects of [Lynn, Opheim, Nespeca, Slattery], A952
- left ventricular systolic and diastolic function during treatment of post CABG hypertension [Davies, Karski, Teasdale, Ivanov, Young, Weisel], A145
- low dose aprotinin or tranexamic acid treatment in cardiac surgery [Isetta, Samat, Kotaiche, Jourdan, Grimaud], A80
- neuropsychological change and statistical artifact [Mitzel, Albin, Costello], A1030
- new mixed venous saturation catheter in, perioperative evaluation of [Pond, Blessios, Lappas, McCawley], A411
- noninvasive monitoring of mixed-venous oxygen saturation in infants by near infrared reflectance spectroscopy [Steven, Kurth, Phoon, Nicolson, Chance], A413
- pediatric, cuffed endotracheal tubes for, cause low incidence of postoperative airway problems [Malmros, Fletcher, Jonmaker, Nordstrom], A931
- pediatric inpatients undergoing cardiac surgery, ingestion of clear liquids compared with preoperative fasting in [Dorsey, Nicolson, Schreiner], A920
- plasma glutamate and aspartate levels during cardiac surgery [Amory, Wagner, Nicklas, Zeevalk], A157
- platelet-leukocyte binding on cardiopulmonary bypass [Rinder, Mathew, Bonan, Smith], A58
- platelet-rich plasmapheresis during cardiac reoperations [Reich, Koorn, Vitale, DePerio, Silvay], A987
- preoperative oral clonidine and reduced anesthetic requirement for CABG surgery [Howie, Hiestand, Romanelli, Harris, Rezaei, McSweeney], A41
- prognostic significance of ST segment elevation in CABG surgery [Leung, Hollenberg, Mangano], A84
- protein C activation during extracorporeal circulation for cardiac surgery [Ungureanu, Pelissier, Guillemin, Abry, Carpentier], A69
- randomized blinded trial of amrinone, epinephrine, and amrinone/epinephrine after cardiopulmonary bypass [Royster, Butterworth, Prielipp, Robertie, Kon], A148
- relationship between oxygen delivery and consumption during and following cardiopulmonary bypass [Abrante, Sheikh, Perkins, Raghavan, Samuel, Lumb, Cohen], A66
- renal function not influenced by differences in pH-management and pulsatile/non-pulsatile perfusion during CPB [Badner, Murkin, Lok], A65
- depth**
- with combinations of isoflurane, fentanyl, and N<sub>2</sub>O, EEG prediction of arousal during [Dutton, Smith, Smith], A448
- conscious awareness in general population of anesthetized patients, incidence of [Jordening, Pedersen], A1055
- continuous IV dexmedetomidine infusion as anesthetic adjuvant in hysterectomy [Aho, Erkola, Kallio, Scheinin, Korttila], A308
- prediction of, during narcotic induction, with bispectral analysis of EEG [Kearse, Saini, deBros, Chamoun], A175
- propofol concentration effects relationships for hypnotics and eyelid reflex [Vuyk, Lemmens, Burm, Vietter, Bovill], A316
- electroconvulsive therapy**
- effect of, on electrocardiogram and echocardiogram [Messina, Paranicas, Katz, Markowitz, Yao, Devereaux], A440
- evaluation, preoperative**
- are some laboratory assessments more beneficial than others? [Apfelbaum, Gronert, Murray, Grogono, Thisted, Meyer, Rupani, Lichter, Finn, Schreider, Texidor, Schmittner, Disbrow, White, Duke, Malhotra, Roizen], A898
- is anesthesiologist's knowledge of patient data dependent on who performs evaluation? [Bjoraker], A904
- laboratory screening, do asymptomatic individuals benefit from? [Apfelbaum, Roizen, Murray, Grogono, Gronert, Duke, Thisted, Rupani, Texidor, Schmittner, Coalson, Lichter, Finn, Uittlugt, Malhotra, Disbrow], A1054
- prognostic importance of preoperative hypertension [Helman, Browner, Li, Mangano, SPI Research Group], A110

- should urinalysis be required before elective outpatient surgery? are legislators correct? [Apfelbaum, Gronert, Murray, Grogono, Thisted, Duke, Rupani, Malhotra, Coalson, Lichtor, Finn, Roizen, Graham, Kritch], A1107
- simplified risk scoring system for patients undergoing cardiac surgery [McCarthy, Tuman, Corey, Ivankovich], A114
- neurosurgical**
- capnography for monitoring hyperventilation of head injury patients [Liu, Leighton, Caron, McBride, Bongard], A249
- deep venous thrombosis prophylaxis by low molecular weight heparin [Melon, Keravel, Gaston, Huet, Combes, Neuronox Group], A214
- effect of anesthetic agents on transcranial magnetic motor evoked potentials in patients [Losasso, Boudreaux, Muzzi, Cucchiara, Daube], A1032
- effect of desflurane and isoflurane with N<sub>2</sub>O on cerebrospinal fluid pressure in patients with supratentorial mass lesions [Muzzi, Daltner, Losasso, Weglinski, Milde], A167
- hemodynamic manipulations during: arterial pulse contour analysis trending of cardiac output [Weissman, Ornstein, Young], A469
- hypertonic, hyperoncotic hydroxyethyl starch decreases intracranial pressure following neuro trauma [Weinstabl, Mayer, Germann, Steltzer, Hammerle], A201
- pharmacokinetic comparison during and after infusion for, sufentanil *versus* fentanyl [Artru, Levron, Charlot, Le Moing, Chacornac], A324
- postoperative hyperdynamic cardiovascular response following intracranial excision of arterial venous malformation [Porembka, Ebrahim, Bloomfield, Stuebing], A215
- propofol *versus* morphine and barbiturates, in sedation of patients with severe head injury [Pearson, Kruse, Demetron], A248
- protein catabolism in, urea and total urinary nitrogen as measures of [Hyman, Naukam, Flakoll], A264
- relationship between end-tidal and arterial carbon dioxide in neurointensive care patients [Russell, Graybeal], A197
- thiopental loading and hypothermic circulatory arrest for complex cerebral artery aneurysm surgery [Stone, Young, Solomon, Smith, Ostapkovich], A54
- urapidil increases intracranial pressure in head trauma patients [Germann, Weinstabl, Mayer, Krafft, Hammerle], A247
- obstetric**
- 0.0625% bupivacaine/0.0002% fentanyl via patient-controlled epidural analgesia for pain of labor and delivery [Ferrante, Barber, Segal, Hughes, Datta], A737
- anesthesia personnel, neonatal resuscitation, and courts [Heyman, Joseph, Salem, Heyman], A1074
- antiemetic efficacy of prophylactic metoclopramide for cesarean delivery [Lussos, Bader, Thornhill, Datta], A1081
- cesarean delivery under regional anesthesia, assessment of electrocardiographic and echocardiographic changes during [Utterback, James, Chen, Geiser], A1080
- cesarean section, propofol as induction and maintenance agent for: maternal and neonatal effects [Richardson, Abboud, Zhu, Donovan, Peres da Silva, Song, Gottschling, Homyak, Houpt, Yakal, Rogers], A1078
- cesarean section, ST-segment changes during [Zakowski, Goldstein, Ramanathan, Turndorf], A1079
- coagulation studies in parturient: how do we practice? [Voulgaropoulos, Palmer], A1073
- combination of low dose epidural morphine and intramuscular diclofenac sodium for postcesarean analgesia [Sun, Wu, Lin, Chang, Mok], A745
- continuous epidural analgesia post-C/S: effect of diluent volume [Cohen, Amar, Pantuck, Pantuck, Landa, Widroff], A860
- desflurane analgesia in: maternal and neonatal effects [Swart, Abboud, Zhu, Donovan, Peres da-Silva, Justice, Schaefer, Smith, Toliver, Skeen, Yakal, Rogers], A844
- effect of epidural butorphanol and fentanyl on shivering during C-section [Chen, Kwan], A843
- epidural analgesia for labor, maternal temperature regulation during [Hortvet, Camann, Hughes, Bader, Datta], A849
- epidural clonidine, following cesarean section: effect of prior local anesthetic [Huntoon, Eisenach, Boese], A855
- epidural fentanyl and sufentanil with bupivacaine and neonatal effects [Loftus, Hill, Cohen], A856
- epidural fentanyl does not worsen post-cesarean section analgesia when administered before epidural morphine [Vincent, Chestnut, Choi, Coffin, Ostman, Bates, Laszewski], A861
- epidural fentanyl-bupivacaine for cesarean section, placental transfer and neonatal effects of [Bang, Helbo-Hansen, Lindholm, Klitgaard], A847
- epidural *versus* intravenous butorphanol for post-cesarean delivery analgesia [Loferski, Camann, Stone, Datta], A848
- epidural with bupivacaine-epinephrine mixture, maternal and fetal catecholamine levels following [Weinberg, Zakowski, Ramanathan], A846
- incidence of postdural puncture headache in obstetrical patients: comparing 24-gauge and 22-gauge Sprotte needles [Leeman, Sears, O'Donnell, Reisner, Jassy, Harmon, O'Donnell, Kelleher, Stanos], A853
- intrathecal fentanyl does not improve intrathecal morphine analgesia after cesarean section [Boerner, Norris, Leighton, Arkoosh, Torjman], A858
- intrathecal fentanyl for labor analgesia [Zakowski, Goldstein, Ramanathan, Turndorf], A840
- intrathecal labor analgesia, comparison of fentanyl, meperidine, and sufentanil for [Honet, Arkoosh, Hufnagle, Norris, Leighton], A839
- intrathecal sufentanil and fentanyl for labor analgesia, comparison between [Sharkey, Arkoosh, Norris, Honet, Leighton], A841
- intrathecal sufentanil/tetracaine for cesarean section surgery [Pan, Mok], A743
- metoclopramide: analgesic adjunct for labor-like pain [Rosenblatt, Saberski, Sinaura, Cioffi], A675
- patient-controlled epidural analgesia during labor, double-blind patient evaluation of [Price, Fontenot, Weinger, Reisner, Henry], A836
- serum CK and CK-MB levels in cesarean section patients [Ross, Conrad, Mitruka, Baker], A862
- spinal anesthesia for postpartum tubal ligation: meperidine *versus* lidocaine [Honet, Costello, Norris, Arkoosh, Leighton], A859
- spinal catheter does not reduce post-spinal headache after cesarean section [Blaise, Cournoyer, Perrault, Bedard, Petit, Landry], A857
- sufentanil: epidural administration during labor and delivery, maternal and neonatal plasma levels after [Kick, Vertommen, van Aken, Gryseels], A837
- unilateral blockade during labor epidural analgesia, risk factors associated with [Langeron, Hamza, Narchi, Lecoq, Smida], A832
- ophthalmologic**
- bilateral infraorbital block with 0.05% bupivacaine in children [Nicodemus, Ferrer, Cristobal, de Castro], A690
- effects of propofol sedation for ophthalmic nerve blocks [Beatie, Stead], A28
- effects of single bolus dose of propofol and methohexital in eye surgery patients [Moorthy, Dierdorf, Reddy, Mattice, Yee], A39
- retrobulbar nerve blocks, current anesthesia practice and training in [Lubenow, Deutsch, Narbone, Ivankovich], A885

- strabismus operations on outpatient basis, comparison of lorazepam to droperidol as antiemetic in children undergoing [Khalil, Berry, Howard, Hanis, Mazow], A958
- topical, proparacaine for, reduction of pain from initial application of [Brady, Robinson, Hustead, Becker], A678
- orthopedic**
- analgesia following arthroscopic knee surgery, comparison of intra-articular bupivacaine and morphine for [Dickstein, Raja, Johnson], A767
- arthroscopic knee surgery, efficacy of intra-articular morphine or bupivacaine following [Heard, Edwards, Ferrari, Hanna, Willock], A670
- comparison of analgesia after major surgery: transdermal fentanyl delivery system *versus* morphine IM [Boerner, Bell, Bartkowski, Torjman, Lessin, Marr], A709
- continuous postoperative epidural infusion of 0.25% bupivacaine with or without opiates, unpredictability of sensory level regression during [Ferrante, Fanciullo, Kistler, Katz, Concepcion], A750
- hemodynamic changes during cemented non-hinged total knee prosthesis insertion: influence of tourniquet utilization [Paugam, Gentil, Chandon, Debaene, Augereau, Lienhart], A165
- hemodynamic effects of pneumatic tourniquet in patients with and without cardiovascular disease [Fahmy, Patel, Sunder], A905
- hip arthroplasty, methylmetacrylate blood levels during [Gentil, Paugam, Wolf, Augereau, Lienhart], A288
- increased homologous blood requirement after isovolemic hemodilution with 6% hydroxyethyl starch during elective total hip replacement [Singelyn, Gouverneur], A73
- local, effects of, after outpatient arthroscopy [Smith, Shively, White], A667
- pediatric scoliosis surgery, nurse-controlled *versus* patient-controlled analgesia following [Weldon, Connor, White], A935
- pneumatic tourniquet, effects of, on circulatory variables, plasma catecholamines and renin activity [Fahmy], A251
- preoperative use of erythropoietin in adolescents undergoing scoliosis surgery: hematologic and cardiovascular and side effects [Rothstein, Roye, Verdisco], A959
- respiratory effects of fentanyl transdermal delivery system compared to fixed interval IM morphine following spinal surgery [Torjman, Bartkowski, Marr, Lessin, Boerner], A1101
- route of PCA affects incidence of urinary retention following surgery [Prados, Renfro], A751
- spinal, with 27-gauge needles for outpatient knee arthroscopy in patients 12 to 18 years old [Kang, Romeyn, Shenton, Tompkins, Furlano], A1103
- total hip arthroplasty, cemented *versus* noncemented, greater embolic echogenesis in [Weber, Ereth, Abel], A390
- total knee and hip arthroplasty, perioperative mortality following—role of anesthesia care? [Sharrock], A868
- otolaryngologic**
- individuality of breathing patterns during hypoxia and exercise [Eisele, Wuyam, Benchetrit, Savouray, Bittel], A1100
- pharyngoplasty in children, anesthetic morbidity associated with: five year review [Halpern, Roy], A933
- outpatient**
- anesthetic morbidity in congenital heart disease patients undergoing surgery [Strafford, Henderson], A866
- atracurium *versus* vecuronium, comparison of effects of [Zahl, Wetchler, Kallar, Bogetz], A1106
- automated computer-assisted anesthesia interview for [Stead, Trentalange], A489
- cardiovascular effects of desflurane in [Fletcher, Sebel, Murphy, Smith, Flister, Mick], A140
- computerized preanesthetic evaluation system, disease descriptors for [Jackson, Gibby, Gravenstein, Paulus], A495
- desflurane *versus* propofol for laparoscopic surgery [Kallar, Everett], A10
- desflurane *versus* propofol for outpatient laparoscopy [Thirion, Clergue, Seebacher], A18
- desflurane *versus* propofol for [Smith, Van Hemelrijck, White], A13
- effect of intraoperative ketorolac on recovery after laparoscopy [DeLucia, White], A14
- effect of ketorolac on postoperative narcotic requirements of gynecological surgery outpatients [Prados, Blaylock], A6
- effect of ondansetron on recovery time, sedation level and discharge from ambulatory surgery [Kovac, Steer, Hutchison, Calkins, Joslyn], A7
- failure of ketorolac to prevent severe postoperative pain following laparoscopy [Pandit, Kothary Lebendom-Mansour, Levy, Randel, Mathai], A33
- hemodynamic effects and postoperative respiratory depression of fentanyl, sufentanil, alfentanil, and nalbuphine [Cheng, Chapman, Chung, Ong, Romanelli], A24
- is coloscopic preparation with oral polyethyleneglycol 2 hours before general anesthesia safe in ambulatory patients? [Mahiou, Narchi, Gory, Veyrac, Germond, Bazin], A1108
- is desflurane superior to propofol for outpatient anesthesia? [Lebenbom-Mansour, Pandit, Kothary, Randel, Levy], A19
- ketorolac superior to sufentanil, giving longer pain relief with less nausea and less recovery time after laparoscopy [Belamy, Chovan, Brose, Gunzenhauser], A29
- ketorolac *versus* fentanyl analgesia for operations with local anesthesia [Bosek], A762
- local, effects of, after outpatient arthroscopy [Smith, Shively, White], A667
- long propofol infusion *versus* isoflurane for ambulatory surgery, recovery and discharge after [Valanne, Korttila], A15
- oral midazolam premedication in pediatric day surgery, efficacy and feasibility of [McMillan, Spahr-Schopfer, Sikich, Hartley], A27
- PADS-A discriminative discharge index for ambulatory surgery [Chung, Ong, Seyone, Mati, Chan], A1105
- preoperative assessment clinic reduces day surgery cancellations [Maccarthur, Maccarthur, Bevan, Steeves], A1109
- propofol-nitrous oxide *versus* halothane/isoflurane-nitrous oxide in pediatric outpatient surgery [Martin, Bargas, Nicolson, Chan, Seidl-Freidman, Tiffany], A970
- psychomotor effects of IV ondansetron in female outpatients [Pearson, From, Ostman, Demetrios, Anderson, Forbes, Joslyn], A8
- quality assurance analysis of unanticipated admissions following ambulatory surgery—the “New York experience” [Twersky, Greenberg, Levine], A26
- recovery and discharge times following propofol, thiopental, and halothane, in pediatric outpatients [Hannallah, Schafer, Britton, Norden, Patel], A25
- should urinalysis be required before elective outpatient surgery? are legislators correct? [Apfelbaum, Gronert, Murray, Grogono, Thisted, Duke, Rupani, Malhotra, Coalson, Lichtor, Finn, Roizen, Graham, Kritch], A1107
- spinal anesthesia with 27-gauge needles for outpatient knee arthroscopy in patients 12 to 18 years old [Kang, Romeyn, Shenton, Tompkins, Furlano], A1103
- Sprotte *versus* Quincke tip needles in, randomized comparison of [Broome, Schapiro], A1104
- strabismus operations on outpatient basis, comparison of lorazepam to droperidol as antiemetic in children undergoing [Khalil, Berry, Howard, Hanis, Mazow], A958
- surgical, postoperative mood assessment in, impact of vomiting and pain [Young, Kitz, Conahan, Aukburg, Lecky], A5
- surgical, sustained release prochlorperazine for prevention of nausea and vomiting in [Young, Kitz, Conahan, Aukburg, Lecky], A4

## pediatric

- airway device selection with body length tape measure [Hinkle, Arnold], A402
- airway pressure release ventilation, optimal release time during [Martin, Wetzel], A263
- amputation, incidence of phantom sensation and pain in [Krane, Heller, Pomietto], A691
- amrinone in children after Fontan procedure for repair of complex cyanotic congenital heart disease, hemodynamic effects of [Sorensen, Lynn, Stevenson, French], A961
- anesthesia personnel, neonatal resuscitation, and courts [Heyman, Joseph, Salem, Heyman], A1074
- antiemetic in children undergoing strabismus operations on outpatient basis, comparison of lorazepam to droperidol as [Khalil, Berry, Howard, Hanis, Mazow], A958
- axillary brachial plexus block for emergency procedures in young children [Tryba, Haensch, Zenz], A757
- bilateral infraorbital block with 0.05% bupivacaine [Nicodemus, Ferrer, Cristobal, de Castro], A690
- body temperature in pediatric patients, effect of lower limb tourniquet on [Ginsberg, Bloch, Binner], A957
- cardiac surgery, cuffed endotracheal tubes for, cause low incidence of postoperative airway problems [Malmros, Fletcher, Jonmaker, Nordstrom], A931
- caudal: a survey [Gunter], A936
- children, anesthetic morbidity associated with pharyngoplasty in: five year review [Halpern, Roy], A933
- children, caudal fentanyl-bupivacaine for analgesia in [Campbell, Yentis, Fear, Bissonnette], A939
- children, continuous infusion of low-dose morphine for postoperative analgesia in [Taylor, Boswell], A937
- children, safety of oral midazolam premedication for [Spahr-Schopfer, McMillan, Sikich, Hartley, Lerman], A921
- children anesthetized with halothane, dose response of ORG 9426 in [Bikhazi, Marin, Mouhanna, Halliday, Folds], A1067
- children labeled as "malignant hyperthermia susceptible," perioperative course of [Yentis, Hartley], A870
- in children using double mask system, reduced exposure to halothane and nitrous oxide by operating personnel during induction of [Weber, Unterberger, Gangoly], A927
- coagulation defects in neonates during CPB [Kern, Morana, Sears, Hickey], A63
- colorimetric end-tidal carbon dioxide detector in children, validation of [Kelly, Wilhoit, Brown, Case], A946
- comparison of ketorolac and morphine when used during pediatric surgery [Watcha, Jones, Schweiger, Lagueruela, White], A942
- comparison of propofol to ketamine for, in pediatric cardiac catheterization patients [Lebovic, Reich, Steinberg, Rossi, Vela, Silvey], A956
- corrective operations in infants and children with congenital heart defects, metabolic effects of [Puhakka, Rasanen, Leijala, Peltola], A965
- cytokine elevation in children with sepsis syndrome and ARDS [Costarino, Sullivan, Harris, Kilpatrick], A245
- desflurane in: maintenance and emergence characteristics [Dinner, Embree, Sharp, Damask], A929
- difficult intubation in newborns and infants using ultra thin fiberoptic bronchoscope [Monrigan, Granry, Le Rolle, Rod, Cavellat], A1044
- do small children have limited adrenocortical response to ACTH during abdominal surgery? [Wolf, Eyres, Laussen], A948
- double-burst characteristics of muscle relaxants in children [Crawford, Bissonnette], A811
- droperidol and vomiting after strabismus repair, P6 acupuncture [Yentis, Bissonnette], A3
- effect of brain reperfusion strategy on cerebral blood flow and metabolism after total circulatory arrest in children [Greeley, Mault, Baldwin, Stockwell, Reves, Ungerleider], A966
- effect of intranasal midazolam on memory in pediatric patients [Twersky, Hartung, McClain, Berger, Beaton], A919
- effects of disease on protein binding [Stiller, Davis, Cook, McGowan], A963
- endotracheal tubes, pressure support ventilation to decrease work of breathing imposed by [Gullahorn, Banner, Beriman], A256
- epidural morphine with butorphanol in [Lawhorn, Brown], A940
- former premature infant, comparison of spinal and general anesthesia in [Krane, Haberkern, Jacobson], A912
- former preterm infants, single-dose and continuous microcatheter spinal anesthesia in [McDonald, Berkowitz, Santini, Alverio], A911
- glycopyrrolate in children, pharmacokinetics of [Kanto, Rautakorpi, Ali-Melkkila, Iisalo, Kaila], A353
- infant apnea detection after herniorrhaphy [Bell, Dubose, Seashore, Touloukian, Oh, Hughes], A1047
- infants, new endotracheal tube connector for sampling end-tidal CO<sub>2</sub> in [Halpern, Bissonnette], A930
- infants, optimal agent for inguinal herniorrhaphy in: spinal lidocaine [Sukhani, Ramamoorthy, Wahood, Black], A914
- infants and children, concurrent validation of objective pain scale for [Norden, Hannallah, Getson, O'Donnell, Keliher, Walker], A934
- infants and children, estimating distance from skin to lumbar epidural space in [Ikemura, Yamashita], A943
- infants revisited, cricoid pressure in [Moynihan, Brock-Utne], A932
- influence of aprotinin on coagulation patterns and blood loss in infants undergoing surgery for congenital heart defects [Mossinger, Dietrich, Spannagel, Jochum, Richter], A77
- initial experience of switchover from halothane to sevoflurane in [Miyasaka, Muto, Takata, Sakai, Kondo, Sun], A1048
- inpatients undergoing cardiac surgery, ingestion of clear liquids compared with preoperative fasting in [Dorsey, Nicolson, Schreiner], A920
- intranasal phenylephrine in children, clinical effects of pharmacokinetics of [Christensen, Armstead, Bilyu, Johnson, Friesen], A967
- ischemia and reperfusion in newborn heart: effect of glucose [McGowan, Downing], A1046
- IV morphine infusion in infants and toddlers following cardiac surgery, respiratory effects of [Lynn, Opheim, Nespeca, Slatery], A952
- methohexital requirements for IV induction of [Westrin], A960
- morphine *versus* fentanyl: epidural opiates for postoperative pain relief in [Lejus, Roussiere, Testa, Ganansia, Ricard], A941
- newborn, epidural in, lidocaine and bupivacaine plasma levels after [Rochette, Beauvoir, Desh, Biboulet, d'Athis], A917
- nitrous oxide does not increase vomiting in children [Splinter, Roberts, Rhine, MacNeill, Gould, Menard, Navaneelan, Komocar], A949
- oral midazolam premedication in day surgery, efficacy and feasibility of [McMillan, Spahr-Schopfer, Sikich, Hartley], A27
- oral transmucosal fentanyl citrate for procedures in children, safety and efficacy of [Conard, Rosenblum, Weisman, Schecter, Bartolotta, Altman, Quinn], A954
- ORG 9426 infusion requirements in children during halothane anesthesia [Brandom, Woelfel, Sarner, Cook], A1072
- parents' response to observing anesthesia induction in their children [Honig, Maguire, Hannallah], A1051



- patient-controlled analgesia with morphine *versus* meperidine [Vetter], A692
- perioperative use of three hydrating solutions in children, blood glucose and electrolyte changes following [Dubois, Gouyet, Murat, Saint-Maurice], A945
- pharmacokinetics of ketamine in [Malinovsky, Servin, Lepage, Cozian, Pinaud], A351
- postoperative apnea in infants, observation of [Naylor, Radharkrishnan, Thisted, McLaughlin], A955
- postoperative CPK levels in healthy pediatric patients [Kerker, Dhandha, Jewell], A950
- postoperative management of anti-reflux surgery, comparison of epidural opioids and intravenous opioids in [McNeely], A689
- postoperative pain in infants, objective index of: EEG spectral activity [Meyer, Jayais, Bensouda, Mayer, Barrier], A1026
- premature infants undergoing inguinal hernia repair, continuous caudal anesthesia with 2-chloroprocaine for [Henderson, Sethna, Berde], A916
- preoperative assessment clinic reduces day surgery cancellations [Maccarthur, Maccarthur, Bevan, Steeves], A1109
- propofol for induction and maintenance of: comparative study [Halpern, Crawford, Sloan, Sikich, Bissonnette, Lerman], A962
- propofol for prevention of chemotherapy-induced nausea and vomiting in pediatric cancer patients [Scher, McDowall, Barst], A1050
- propofol in: effect of dose and age [Blackstock, Steward], A924
- propofol-nitrous oxide *versus* halothane/isoflurane-nitrous oxide in pediatric outpatient surgery [Martin, Bargas, Nicolson, Chan, Seidl-Freidman, Tiffany], A970
- prospective study in 270 children: effects of pH-adjustment and warming of bupivacaine on onset and duration of epidural anesthesia [Mansoor, Dalens], A938
- real and false positive capnography and pulse oximetry alarms during; incidence of [Rolf, Cote], A476
- recovery and discharge times following propofol, thiopental, and halothane [Hannallah, Schafer, Britton, Norden, Patel], A25
- recovery characteristics following propofol induction and maintenance anesthesia in children [Halpern, Crawford, Sloan, Sikich, Bissonnette, Lerman], A16
- reflex sympathetic dystrophy in: follow-up of 70 patients [Wilder, Berde, Wolohan, Micheli, Vieyra], A693
- regional, in children, insulin response during [Gouyet, Dubois, Murat, Saint-Maurice], A944
- respiratory pattern and function in neonate, effect of branched-chain amino acid supplementation on [Blazer, Reinersman, Askanazi, Hollinger, Kvetan, Katz, Fleischman], A1093
- reversal of deep neuromuscular blockade with 40µg/kg versus 70µg/kg neostigmine in infants and children [Bires, McGregor], A964
- scoliosis surgery, nurse-controlled *versus* patient-controlled analgesia following [Weldon, Connor, White], A935
- spinal anesthetics in newborns: bupivacaine plasma concentrations [Beauvoir, Rochette, Desh. Galy, d'Athis], A968
- spinals without supplement: in search of optimal drug and dose [Ramamoorthy, Sukhani, Black], A915
- thoracic epidural anesthesia via caudal approach in children [Gunter, Eng], A1049
- transesophageal echo: evaluation of feasibility and utility in 129 examinations [Sorensen, Stevenson], A391
- transmucosal midazolam for preinduction of: comparison of intranasal and sublingual routes [Karl, Larach, Ruffle], A922
- transtracheal Doppler in, effects of growth on measurements [Saeki, Namba, Nakayama, Tokioka, Morita, Hirakawa], A459
- unpremedicated children, does general anesthesia produce retrograde amnesia in? [Halpern, Lerman], A928
- vecuronium priming in children: optimal dose and priming interval [Woloszczuk-Gebicka, Forestner, Furman], A951
- in young children, pharmacokinetics of intranasal and intravenous midazolam [Delaunay, Murat, Rey, Pons, Saint-Maurice], A923
- scheduling**  
does regional anesthesia significantly delay surgery? retrospective study [Nichols, Nagel, Gantt], A884
- thoracic**  
continuous epidural analgesia *versus* intravenous patient controlled analgesia: vital capacity after thoracotomy [Vanhoorebeeck, Vertommen, Van Aken, Vandermeersch], A116
- epidural fentanyl after thoracotomy, shorter hospital stay with [Guinard, Mavrocordatos, Cuttat, Chiolero], A698
- epidural fentanyl and PCA morphine in post-thoracotomy pain, double-blind comparison of [Benzon, Wong, Belavic, Locicero], A712
- isoflurane, direct measurement of effects of, on hypoxic pulmonary vasoconstriction during one-lung-ventilation [Groh, Kuhnle, Kubler, Goetz, Peter], A341
- operative lung CPAP with univent bronchial blocker tube [Benumof, Gaughan, Ozaki], A120
- postthoracotomy pain relief: does technique really make a difference? [Miguel, Hubbell], A1091
- stress response after thoracotomy: intravenous *versus* epidural fentanyl [Mavrocordatos, Guinard, Chiolero], A697
- urologic**  
patient-controlled analgesia for extracorporeal renal shock wave lithotripsy: prospective study [Levin, Amory, Kortis, Wagner, Pollak], A713
- post-anesthesia care unit stay following TURP: should tetracaine spinal be abandoned? [Mychaskiw, Chung, O'Connor, Perlstein], A890
- transurethral balloon dilation, new anesthetic technique for, initial results with prostatic block [Belani, Reddy], A731
- Anesthesia circuits. See under Equipment**
- Anesthesia machines. See under Equipment**
- Anesthesia masks. See under Equipment**
- Anesthesiologists. See also under Personnel**  
abilities of, to recognize musical alarm tones, evaluation of [Block], A497
- abstracts presented at anesthesia meetings: here today and gone tomorrow? [Campbell, Yentis, Lerman], A886
- administering anesthesia, analysis of: additional objective measures [Herndon, Weinger, Paulus, Zornow, Gaba], A487
- anesthesia crisis resource management training [Gaba, Howard, Fish, Yang, Sarnquist], A1062
- anesthetic critical incidents analyzed using cognitive science techniques [Cook, Woods, McDonald], A865
- do not resuscitate orders and, survey on [Clemency], A888
- do not resuscitate orders in presurgical patient: study of U.S. Anesthesiology Department Policies [Rothenberg, Franklin, Ivankovich, McCarthy], A907
- Hawthorne effect in anesthesiology practice [Downs, Hodges], A882
- opinions and concerns of, survey of: DNR orders in operating room [Boyd, Boudreaux], A900
- physician agreement in judging clinical performance [Posner, Caplan, Cheney], A1058
- quality assurance data obtained from every anesthetic with self-completed check-off data sheet [Palmer, Tinnell, Ber-man, Jones, Gibbs], A909
- radiation exposure of [Henderson, Lu, Rockoff, Strauss, Treves], A896

- relative importance of factors used to select residents: national survey [Frankville, Benumof], A876
- special qualifications for, in practicing pain management [Korevaar, Arbittier], A764
- urine drug testing in anesthesia, advance for: norfentanyl is detectable in urine for 48 hours [Silverstein, Reiders, McMullin, Schulman, Zahl], A895
- Anesthetic potency.** *See* Potency, anesthetic
- Anesthetics.** *See under* Measurement techniques
- Anesthetics, gases**
- nitrous oxide**
- as cerebral vasodilator? [Lu, Gibson, Monell, Frost, Goldiner], A539
- comparison of, with subanesthetic xenon: analgesic and psychomotor effects [Yagi, Mashimo, Kawaguchi, Pak, Yoshiya], A342
- comparison of sevoflurane-N<sub>2</sub>O and propofol-isoflurane-N<sub>2</sub>O [Smith, Ding, White], A344
- does not increase vomiting in children [Splinter, Roberts, Rhine, MacNeill, Gould, Menard, Navaneelan, Komocar], A949
- effect of, on cortical magnetic motor evoked potentials [Sloan, Levin], A450
- effect of, on surgical conditions during laparoscopic cholecystectomy [Taylor, Feinstein, Soper, White], A330
- more potent cerebrovasodilator than isoflurane in humans [Lam, Slee, Cooper, Bachenberg, Mathisen], A168
- subanesthetic concentrations of isoflurane and, learning and responsiveness at [Dwyer, Bennett, Eger], A334
- xenon**
- comparison of, with nitrous oxide: analgesic and psychomotor effects [Yagi, Mashimo, Kawaguchi, Pak, Yoshiya], A342
- Anesthetics, intravenous**
- alfentanil**
- acute tolerance with, evidence for rapid onset of [Hiestand, Howie, Romaneli, Jopling, Rezaei, McSweeney], A322
- administered by multiple bolus and continuous infusion in presence of either nitrous oxide or propofol, pharmacokinetics of [Avram, Sanghvi, Henthorn, Fragen, Asada, Pemberton, Correll, Minieka], A320
- cerebral hemodynamic and metabolic response to, in humans [Slee, Lam, Winn, Laohaprasit], A171
- cerebral microvascular effects of, in piglets [Monitto, Kurth], A542
- desflurane *versus*, for outpatient laparoscopy [Pavlin, Kallar, Everett, Hautman, Rapp, Luke, Lecky], A11
- gastric fluid concentrations of, following infusion of [Prasloski, Parsons], A318
- infusion of, prediction of plasma concentrations during: accuracy of different pharmacokinetic models, in volunteers [Barvais, Cantraine, d'Hollander, Coussaert], A319
- inotropic effect of, [Martin, Lin, Lee, Lee], A514
- negative inotropic effects of propofol and midazolam not potentiated by, in perfused isolated rat hearts [Rouge, Ouhayoun, Gantet, Ewquerre, Cathala], A513
- predication of plasma concentrations of midazolam and, accuracy of, in coronary surgery [Barvais, d'Hollander, Ganghi, Syllinn], A40
- diazepam**
- effect of, on antinociceptive actions of GABA<sub>A</sub> agonists in spinal cord of rat [Howard, Hammond], A579
- etomidate**
- effect of, on intercellular communications between astrocytes [Mantz, Cordier, Desmonts, Giaume], A581
- effect of, on motor evoked responses to transcranial electrical or magnetic stimulation in humans [Kalkman, Drummond, Ribberink, Patel, Sano, Bickfor], A1024
- growth of *staphylococcus aureus* in [Sosis, Braverman, Villafior], A439
- interaction of dexmedetomidine and, in chronically instrumented dogs [Proctor, Schmeling, Kampine, Warltier], A558
- modulation of central GABA<sub>A</sub>-receptor gated current [Yang], A578
- produces vasodilation by mixed endothelium-dependent and independent mechanisms [Dozaki, Chang, Davis], A537
- propofol *versus*; anesthesia for carotid endarterectomy [Paillot, Van Hemelrijck, Van Aken], A180
- reduced side-effects of, with new solvent 2-hydroxypropyl-β-cyclodextrin [Doenicke, Angster, Beger-Hintzen, Vollmann, Nebauer], A381
- fentanyl**
- cerebral microvascular effects of, in piglets [Monitto, Kurth], A542
- effect of, on motor evoked responses to transcranial electrical or magnetic stimulation in humans [Kalkman, Drummond, Ribberink, Patel, Sano, Bickfor], A1024
- effect of, on neurogenic motor evoked potentials recorded at spinal and sciatic level [Peterson, Mongan], A179
- high-dose, regional EEG response to induction of, evaluated by new brain function monitoring system [Ochiai, Koitabashi, Toyoda, Fukushima], A445
- influence of pharmacokinetic variability on pharmacologic response [Williams, Smith, Jacobs], A48
- inotropic effect of, [Martin, Lin, Lee, Lee], A514
- propofol with [Glass, Dyar, Jhaveri, Goodman, Goodale], A44
- sufentanil *versus*; pharmacokinetic comparison during and after infusion for neurosurgical anesthesia [Artru, Levron, Charlot, Le Moing, Chacornac], A324
- ketamine**
- action of, on cloned potassium channels using voltage clamp techniques, molecular basis of [Kulkarni, Bayley, Anantharam, Treisman], A383
- bronchodilatation by, reinvestigation of mechanism of [Ben-Harai, Bansinath], A627
- comparison of propofol and, for anesthesia in pediatric cardiac catheterization patients [Lebovic, Reich, Steinberg, Rossi, Vela, Silvey], A956
- differential effects of, on respiratory muscles of larynx in dogs [Iwasaki, Namiki, Omomte, Yamakage, Yamasawa], A115
- differential response of proximal and distal coronary arteries to [Coughlan, Flynn, Bosnjak, Kampine, Warltier], A535
- effect of, on intercellular communications between astrocytes [Mantz, Cordier, Desmonts, Giaume], A581
- effect of, on neurogenic motor evoked potentials recorded at spinal and sciatic level [Peterson, Mongan], A179
- effect of duration of, on pulmonary acid injury [Coleman, Rutter, Tait, Johnson, Knight], A998
- improves outcome from incomplete cerebral ischemia, in rats [Hoffman, Pelligrino, Albrecht], A605
- interaction of dexmedetomidine and, in chronically instrumented dogs [Proctor, Schmeling, Kampine, Warltier], A558
- liver microsomal metabolism of, stereochemical aspects of, in human [Kharasch, Kunze, Herrmann], A382
- metabolism of, as probe for dexmedetomidine effects on human drug biotransformation [Kharasch], A311
- myoglobinemia induced by succinylcholine effectively reduced by [Noguchi, Amamiya, Andou, Sankawa], A299
- neurotoxicity, chlorbutanol is responsible for, in rabbits [Malinovsky, Lepage, Mussini, Cozian, Pinaud], A650
- pharmacokinetics of, in children [Malinovsky, Servin, Lepage, Cozian, Pinaud], A351
- protective effect of, following closed cranial impact in rats [Shapira, Artru, Lam], A203
- slow blockade of NMDA channels by [Orser, MacDonald], A1033

**methohexital**

- EEG effects of, compared to propofol [Reddy, Moorthy, Mattice, Dierdorf, Dietsch], A182
- growth of *staphylococcus aureus* in [Sosis, Braverman, Villaflor], A439
- reduces depolarization-induced calcium entry into cultured rat hippocampal neurons [Bleakman, Jones, Roback, Hornberger, Radke, Miller, Harrison], A583
- requirements, for IV induction of anesthesia in children [Westrin], A960
- single bolus dose of propofol and, effects of, in eye surgery patients [Moorthy, Dierdorf, Reddy, Mattice, Yee], A39

**midazolam**

- comparison of propofol and, for colonoscopy [Rosenblum, Ritter, Starsnic, Azad, Torjman, Seltzer, Marks], A31
- effect of, on motor evoked responses to transcranial electrical or magnetic stimulation in humans [Kalkman, Drummond, Ribberink, Patel, Sano, Bickfor], A1024
- effect of, on transcranial magnetic motor evoked potentials in neurosurgical patients [Losasso, Boudreaux, Muzzi, Cuciara, Daube], A1032
- negative inotropic effects of, not potentiated by alfentanil, in perfused isolated rat hearts [Rouge, Ouhayoun, Gantet, Ewquerre, Cathala], A513
- prediction of plasma concentrations of alfentanil and, accuracy of, in coronary surgery [Barvais, d'Hollander, Ganghi, Syllinn], A40
- propofol *versus*, for prolonged sedation in ICU [Geller, Weinbroum, Sorkine, Silbiger, Halpern], A269

**pentobarbital**

- differential effects of, on brain C-fos and jun-B messenger RNA [Marota, Crosby, Uhl], A647
- differential effects of, on sodium channels derived from nerve and muscle [Wartenberg, Wange, Urban, Duch], A1036
- effect of, on antinociceptive actions of GABAA agonists in spinal cord of rat [Howard, Hammond], A579

**propofol**

- age *versus*, pharmacokinetics of [Dyck, Varvel, Hung, Shafer], A315
- alfentanil administered by multiple bolus and continuous infusion in presence of, pharmacokinetics of [Avram, Sanghvi, Henthorn, Fragen, Asada, Pemberton, Correll, Minieka], A320
- amnesia produced by, cognitive mechanism of [Reinsel, Veselis, Marino, Wronski], A185
- arterial compliance increase induced by, accounts for systolic arterial pressure decrease [Dupuy, Schurando, Payen], A144
- autonomic reflexes caused by, surgical stimulation significantly reduces depression of [Latson, Wiley, O'Flaherty], A85
- barbiturates and: depression of nociceptive neurotransmission in spinal cord [Jewett, Tarasiuk, Gibbs, Kendig], A589
- comparison of desflurane with, in outpatients undergoing peripheral orthopedic surgery [Rapp, Conahan, Pavlin, Levy, Hautman, Luke, Lecky], A12
- comparison of ketamine and, for anesthesia in pediatric cardiac catheterization patients [Lebovic, Reich, Steinberg, Rossi, Vela, Silvay], A956
- comparison of midazolam and, for colonoscopy [Rosenblum, Ritter, Starsnic, Azad, Torjman, Seltzer, Marks], A31
- comparison of sevoflurane-N<sub>2</sub>O and propofol-isoflurane-N<sub>2</sub>O [Smith, Ding, White], A344
- computer-controlled infusion of: comparison of three pharmacokinetic models [Viviand, Guidon-Attali, Lacarelle, Borsarelli, Francois], A313
- concentration of, effects relationships for hypnotics and eyelid reflex [Vuyk, Lemmens, Burm, Vietter, Bovill], A316
- desflurane *versus*, for outpatient anesthesia [Smith, Van Hemelrijck, White], A13

- desflurane *versus*, for outpatient laparoscopic surgery [Kallar, Everett], A10
- desflurane *versus*, for outpatient laparoscopy [Thirion, Clergue, Seebacher], A18
- differential response of proximal and distal coronary arteries to [Coughlan, Flynn, Bosnjak, Kampine, Warltier], A535
- direct cardiac effects of, *in situ* canine hearts [Ismail, Kim, Salem, Crystal], A510
- EEG effects of, compared to methohexital [Reddy, Moorthy, Mattice, Dierdorf, Dietsch], A182
- effect of, on motor evoked responses to transcranial electrical or magnetic stimulation in humans [Kalkman, Drummond, Ribberink, Patel, Sano, Bickfor], A1024
- effect of, on neurogenic motor evoked potentials recorded at spinal and sciatic level [Peterson, Mongan], A179
- effect of, on transcranial magnetic motor evoked potentials in neurosurgical patients [Losasso, Boudreaux, Muzzi, Cuciara, Daube], A1032
- endothelium-independent vasodilation produced by, and as calcium channel blocker [Chang, Lacy, Davis], A536
- epileptiform electroencephalographic activity not caused by [Mahla, Grundy, Schmidt, Richards, Mixson], A183
- equipotent concentrations of thiopental and, effects of, on myocardial performance of blood-perfused isolated rabbit heart preparation [Mouren, Albo, Plaud, Szekely, Hendrix, Vertomen, Hebrard, Baron, Viars], A512
- etomidate-isoflurane *versus*: anesthesia for carotid endarterectomy [Paillot, Van Hemelrijck, Van Aken], A180
- with fentanyl [Glass, Dyar, Jhaveri, Goodman, Goodale], A44
- general anesthetic potency of, is consistent with Meyer-Overtton Rule [Tonner, Poppers, Alifimoff, Miller], A586
- growth of *staphylococcus aureus* in [Sosis, Braverman, Villaflor], A439
- improves electrophysiological recovery after anoxia in rat hippocampal slice [Rosenberg, Kass, Cottrell], A606
- as induction and maintenance agent for cesarean section: maternal and neonatal effects [Richardson, Abboud, Zhu, Donovan, Peres da Silva, Song, Gottschling, Homyak, Houpt, Yakal, Rogers], A1078
- for induction and maintenance of anesthesia in children: comparative study [Halpern, Crawford, Sloan, Sikich, Bissonnette, Lerman], A962
- injection, metoclopramide reduces pain of [Ganta, Howard], A674
- injection, modified bier block abolishes local pain associated with [Holak, Mangar], A732
- interaction of dexmedetomidine and, in chronically instrumented dogs [Proctor, Schmeling, Kampine, Warltier], A558
- is desflurane superior to?, for outpatient anesthesia [Lebenbom-Mansour, Pandit, Kothary, Randel, Levy], A19
- is GABA-mediated synaptic transmission enhanced by? [Yamamura, Ohtsuka, Furumido, Tsutahara, Kemmotsu], A588
- isoflurane *versus*, for ambulatory surgery, recovery and discharge after [Valanne, Korttila], A15
- maternal and fetal effects of, in ewe [Alon, Rosen, Shnider, Ball, Parer], A1077
- midazolam compared with, for monitored sedation [Pratila, Fischer, Alagesan, Alagesan, Reinsel, Pratilas], A20
- midazolam *versus*, for prolonged sedation in ICU [Geller, Weinbroum, Sorkine, Silbiger, Halpern], A269
- midazolam *versus*: ICU sedation following CABG [Higgins, Yared, Estafanous, Coyle, Vassel, Goodale], A278
- modulation of GABA<sub>A</sub> receptor by: protein or lipid interaction? [Hales, Lambert], A587
- morphine and barbiturates *versus*, in sedation of patients with severe head injury [Pearson, Kruse, Demetrium], A248

- negative inotropic effect of thiopental greater than, at equipotent concentrations [Cork, Azari, Kramer, Behr, Kaul], A317
- negative inotropic effects of, not potentiated by alfentanil, in perfused isolated rat hearts [Rouge, Ouhayoun, Gantet, Ewquerre, Cathala], A513
- in pediatric patients: effect of dose and age [Blackstock, Steward], A924
- pharmacokinetics and dynamics of, [Monk, Ding, Smith, White], A314
- for prevention of chemotherapy-induced nausea and vomiting in pediatric cancer patients [Scher, McDowall, Barst], A1050
- propofol-nitrous oxide *versus* halothane/isoflurane-nitrous oxide in pediatric outpatient surgery [Martin, Bargas, Nicolson, Chan, Seidl-Freidman, Tiffany], A970
- QT interval during intubation with [Guiraud, Chassard, Gelas, Bouletreau], A83
- rate of infusion of, for constant concentration differs from pharmacokinetic prediction [Crankshaw, Morgan, Dawson], A312
- recovery and discharge times following thiopental, halothane and, in pediatric outpatients [Hannallah, Schafer, Britton, Norden, Patel], A25
- recovery characteristics following induction of, and maintenance anesthesia in children [Halpern, Crawford, Sloan, Sikich, Bissonnette, Lerman], A16
- repeated infusions of, changes in EEG, cerebral blood flow, and cerebral blood flow velocity with, in dogs [Kochs, Cunningham, Hoffman, Werner, Albrecht, Schulte am Esch], A617
- responsiveness maintained during: human CBF-CO<sub>2</sub> [Fox, Gelb, Manninen, Farrar], A169
- sedation, power spectrum changes during [Veselis, Reinsel, Marino, Wronski], A181
- as sedation for ophthalmic nerve blocks, effects of [Beatie, Stead], A28
- in sedative doses is amnestic agent [Veselis, Reinsel, Marino, Wronski], A1023
- single bolus dose of methohexital and, effects of, in eye surgery patients [Moorthy, Dierdorf, Reddy, Mattice, Yee], A39
- spontaneous movements induced by, decreased by nalbuphine not droperidol [Borgeat, Fuchs, Tassonyi], A186
- thiopental *versus*: effect on myocardial contractility [Aasen, Rooney, Hirsch, Mathru, Kross, Rao], A511
- time course of ventilatory depression following [Gross, Conard, Blouin], A1095
- total, EEG characteristics of emergence from [Traast, Kalkman], A184
- tracheal intubation after, without neuromuscular blocker is not practical [Kothary, Pandit, Lebenbom-Mansour, Levy, Randel], A1111
- vasodilation by calcium channel antagonist action produced by [Chang, Lacy, Davis], A553
- simulation of, by IVA-SIM interactive computer program [Schuttler, Kloos], A329
- sufentanil**
- auditory evoked potentials to pitch change during [Plourde, Joffe], A449
- cerebral microvascular effects of, in piglets [Monitto, Kurth], A542
- effect of, on neurogenic motor evoked potentials recorded at spinal and sciatic level [Peterson, Mongan], A179
- fentanyl *versus*,: pharmacokinetic comparison during and after infusion for neurosurgical anesthesia [Artru, Levron, Charlot, Le Moing, Chacornac], A324
- inotropic effect of, [Martín, Lin, Lee, Lee], A514
- total, EEG characteristics of emergence from [Traast, Kalkman], A184
- thiamylal**
- differential effects of, on respiratory muscles of larynx in dogs [Iwasaki, Namiki, Omomte, Yamakage, Yamasawa], A115
- thiopental**
- dose requirement and distribution of, altered by dexmedetomidine [Mappes, Buhner, Lauder, Stanski, Maitre], A306
- effect of, on intercellular communications between astrocytes [Mantz, Cordier, Desmonts, Giaume], A581
- effect of, on transcranial magnetic motor evoked potentials in neurosurgical patients [Losasso, Boudreaux, Muzzi, Cucchiara, Daube], A1032
- equipotent concentrations of propofol and, effects of, on myocardial performance of blood-perfused isolated rabbit heart preparation [Mouren, Albo, Plaud, Szekely, Hendrix, Vertomen, Hebrard, Baron, Viars], A512
- growth of *staphylococcus aureus* in [Sosis, Braverman, Villafior], A439
- loading of, and hypothermic circulatory arrest for complex cerebral artery aneurysm surgery [Stone, Young, Solomon, Smith, Ostapkovich], A54
- negative inotropic effect of, greater than propofol at equipotent concentrations [Cork, Azari, Kramer, Behr, Kaul], A317
- propofol *versus*: effect on myocardial contractility [Aasen, Rooney, Hirsch, Mathru, Kross, Rao], A511
- QT interval during intubation with [Guiraud, Chassard, Gelas, Bouletreau], A83
- similar effects of tetrodotoxin and, on sodium levels in rat hippocampal slice [Abramowicz, Kass, Cottrell], A607
- time course of ventilatory depression following [Gross, Conard, Blouin], A1095
- Anesthetics, local**
- absorption of, via vascular wall: *In Vitro* study [Tambakis, Tadoori, Lovett, Doss, Pillalamari, Chaudhry, Gintautas, Abadir], A768
- bupivacaine**
- 0.25%, comparative study of 0.25% ropivacaine and, for brachial plexus anesthesia [Hickey, Rowley, Candido, Ramamurthy, Winnie], A711
- antinociceptive interactions between morphine and, given epidurally [Rattan, McDonald, Tejwani], A760
- effects of, after outpatient arthroscopy [Smith, Shively, White], A667
- effects of pH-adjustment and warming of, on onset and duration of epidural anesthesia: prospective study in 270 children [Mansoor, Dalens], A938
- interpleural, in plasma and lung lymph, pharmacokinetics of [Suresh, Johnston, Traber, Traber, Arens], A756
- intravenous, nimodipine reduces cardiorespiratory toxicity of, in rats [Hyman, Kinney, Horn, Skelley, Kambam], A677
- mechanism of action of, on synaptic transmission in parasympathetic ganglia [Tabatabai, Booth], A600
- pharmacokinetics of, in pregnant ewes [Wlody, Santos, Arthur, Pedersen, Morishima, Finster, Covino], A829
- plasma levels after epidural anesthesia in newborns [Rochette, Beauvoir, Desh, Biboulet, d'Athis], A917
- prolonged sciatic nerve blockade with, using biodegradable polymer matrix, biochemical and histologic effects of [Masters, Berde, Ward, Martyn, Kupsky], A680
- stimulation of cyclic AMP production by: possible mechanism of local anesthetic cardiovascular toxicity [Butterworth, Brownlow, Cole, Prielipp, Anderson], A682
- sustained release of, from biodegradable polymer matrix, prolonged sciatic nerve block with [Masters, Berde, Dutta, Langer], A765
- toxicity of, increased by epinephrine, in rats [Kinney, Hyman, Horn], A681

**butamben**

suspension, 10%, treatment of chronic intractable back pain with injection of [Shulman, Ivankovich, Braverman, Lubenow], A739

**chloroprocaine**

continuous caudal anesthesia with, for premature infants undergoing inguinal hernia repair [Henderson, Sethna, Berde], A916

**cocaine**

depresses myocardial contractility and produces diastolic dysfunction in conscious dogs [Pagel, Power, Warltier], A508  
hypertension induced by, and response to treatment with labetalol, in ewe [Hughes, Vertommen, Rosen, Messer, Espinoza, Parer, Shnider], A1075

intracoronary administration, nitroglycerin augments coronary flow but does not reverse myocardial depression during [Buffington], A509

pregnancy alters pharmacodynamics of, in rats [Morishima, Cooper, Masaoka, Miller], A827

time dependent cocaine-induced increase in plasma LDH activity decreased by buprenorphine pretreatment [Shukla, Bansinath, Goldfrank, Turndorf], A626

**lidocaine**

1%, with and without sodium bicarbonate for attenuation of pain of skin infiltration and intravenous catheterization [Ferrante, Steinbrook, Hughes, Kistler, Manzi], A736  
attenuation of injection pain from [Farley, Husted, Robinson, Becker], A679

convulsion induced by, effect of acute hypertension on, in rats [Yokoyama, Benson, Goto, Unruh, Arakawa], A717

convulsion induced by, effect of flumazenil on, in rats [Yokoyama, Benson, Goto, Unruh, Arakawa], A728

differential effects of, on tonic nerve ending discharge *versus* axonal conduction [Tanelian, MacIver], A683

effects of, on purified batrachotoxin-modified sodium channels [Flash, Mills, Levinson, Recio-Pinto], A362

electrode sensitive to [Yokono, Yokono, Ogli, Satake, Kaneshina], A358

inhibitory effects of, on proton pump of bacteriorhodopsin [Nishimura, Hamanaka, Kaminoh, Ueda], A1039

intravenous, inhibits induced laryngospasm during halothane anesthesia, in dogs [Jarnberg, Andersen, Cohen, Jamond, Smith], A971

mechanism of action of, on synaptic transmission in parasympathetic ganglia [Tabatabai, Booth], A600

placental transfer of, during maternal hypoxia [Waters, Ramanathan], A828

plasma levels after epidural anesthesia in newborns [Rochette, Beauvoir, Desh, Biboulet, d'Athis], A917

spinal: optimal agent for inguinal herniorrhaphy in infants [Sukhani, Ramamoorthy, Wahood, Black], A914

**mepivacaine**

adding fentanyl and clonidine to, results in rapid onset and prolonged anesthesia and analgesia after brachial plexus blockade [Singelyn, Muller, Gouverneur], A653

**procaine**

inhibitory effects of, on proton pump of bacteriorhodopsin [Nishimura, Hamanaka, Kaminoh, Ueda], A1039

**proparacaine**

for topical eye anesthesia, reduction of pain from initial application of [Brady, Robinson, Husted, Becker], A678

**ropivacaine**

0.25%, comparative study of 0.25% bupivacaine and, for brachial plexus anesthesia [Hickey, Rowley, Candido, Ramamurthy, Winnie], A711

pharmacokinetics of, in pregnant ewes [Wlody, Santos, Arthur, Pedersen, Morishima, Finster, Covino], A829

wound healing not impaired by, in pigs [Carpenter, Guinard, Owens, Ricciardelli], A710

**tetracaine**

inhibitory effects of, on proton pump of bacteriorhodopsin [Nishimura, Hamanaka, Kaminoh, Ueda], A1039

intrathecal injection of, histologic changes following, in neonatal rabbit [Britton, Nagel, Rice, Eighthy, Muldoon], A913

two distinct modes of blockade of single sodium channels manifested by [Gingrich, Beardsley, Yue], A687

**Anesthetics, volatile**

cloning gene controlling sensitivity to, in *Caenorhabditis elegans* [Sedensky, Morgan, Hudson], A648

**desflurane**

alfentanil/nitrous oxide *versus*, for outpatient laparoscopy [Pavlin, Kallar, Everett, Hautman, Rapp, Luke, Lecky], A11

analgesia in obstetrics: maternal and neonatal effects [Swart, Abboud, Zhu, Donovan, Peres da-Silva, Justice, Schaefer, Smith, Toliver, Skeen, Yakal, Rogers], A844

cardiovascular effects of, in outpatients [Fletcher, Sebel, Murphy, Smith, Flister, Mick], A140

comparative effects of isoflurane and, on cerebral blood flow [Ornstein, Young, Ostapovich, Prohovnik, Stein], A209

comparison of propofol with, in outpatients undergoing peripheral orthopedic surgery [Rapp, Conahan, Pavlin, Levy, Hautman, Luke, Lecky], A12

consequences of misfilling contemporary vaporizers with. [Andrews, Johnston, Kramer], A887

differential effects of, in isolated guinea pig hearts [Boban, Buljubasic, Stowe, Kampine, Bosnjak], A506

effect of, with N<sub>2</sub>O on cerebrospinal fluid pressure in patients with supratentorial mass lesions [Muzzi, Daltner, Losasso, Weglinski, Milde], A167

effects of, on hemodynamics and echocardiographic measures of ischemia [Helman, Bellows, Leung, Velasco, Mangano, SPI Research Group], A152

human liver volatile anesthetic defluorination: role of cytochrome P450IIE1 [Kharasch, Thummel], A350

inhalational induction with, effects of premedication on anesthetic requirement, speed of induction and airway activity [Kelly, Hartman, Embree, Sharp, Artusio], A9

is halothane faster than? [Cote, Liu, Alifimoff, Landis], A17  
propofol superior to?, for outpatient anesthesia [Lebenbom-Mansour, Pandit, Kothary, Randel, Levy], A19

myocardial ischemia and: comparative risk *versus* sufentanil anesthesia in patients undergoing coronary artery bypass graft surgery [Helman, Leung, Bellows, Pineda, Mangano, SPI Research Group], A1124

in pediatric anesthesia: maintenance and emergence characteristics [Dinner, Embree, Sharp, Damask], A929

propofol *versus*, for outpatient anesthesia [Smith, Van Hemelrijck, White], A13

propofol *versus*, for outpatient laparoscopic surgery [Kallar, Everett], A10

propofol *versus*, for outpatient laparoscopy [Thirion, Clergue, Seebacher], A18

relative potency of halothane, isoflurane and, in triggering episodes of malignant hyperthermia in swine [Gammel, Wedel, Milde, Iaizzo], A296

vital capacity rapid inhalation induction with, effects of premedication on emergence characteristics and patient acceptance [Hartman, Kelly, Embree, Sharp, Artusio], A23

**diethyl ether**

enhances GABA-gated chloride flux by allosteric mechanism [Quinlan, Firestone], A1034

isolation of mutations that alter sensitivities to, in *Caenorhabditis elegans* [Morgan, Sedensky, Thomas, Kiss], A649

**enflurane**

aging affects kinetic estimates of volumes and perfusions for, in humans [Strum, Eger, Unadkat, Johnson, Carpenter], A375

- assessing and characterizing hypnotic and analgesic effects of anesthetic drugs [Fukunaga, Fukunaga, Kikuta], A45
- does anesthetic technique affect hemostasis after cardiac surgery? [Salmenpera, Kuitunen, Hynynen, Heinonen, Fyhrquist], A74
- dose-effect on motor and somatosensory evoked potentials, comparative analysis of, in primate [Ghaly, Kartha, Stone, Krinsky, Asokan, Alexander], A613
- dose-response relationship of ORG 9426 during [Oris, Vandermeersch, van Aken, Crul], A1063
- effect of, on cortical magnetic motor evoked potentials [Sloan, Levin], A450
- effect of, on time course and amplitude of  $Ca^{2+}$  transients in electrically-stimulated cardiac myocytes [Wilde, Davidson, Knight], A366
- effects of, on conduction velocity in Purkinje fibers in dogs [Vodanovic, Turner, Marijic, Kampine, Bosnjak], A569
- effects of, on spinal cord protein kinase [Austin, Firestone], A1041
- endo/epicardial flow ratio with [Cork, DiNardo, Hilwig, Kern], A505
- endogenous norepinephrine effect attenuated by, in isolated rabbit mesenteric veins [Stadnicka, Flynn, Bosnjak, Kampine], A572
- enhances GABA-activated chloride currents in cultured rat hippocampal neurons at clinically relevant concentrations [Harrison, Jones, Brooks], A1040
- human liver volatile anesthetic defluorination: role of cytochrome P450IIIIE1 [Kharasch, Thummel], A350
- infusion requirements of ORG 9426 in patients receiving [Shanks, Fragen, Ling, Pemberton, Dunn, Howard], A1068
- inhalational, effect of on ischemic kidney, in rats [Yoshimura, Sameshima, Miyao, Oda, Yoshida], A335
- inhibition of Na/Ca exchange in heart cells by [Haworth, Goknur], A576
- isolation of mutations that alter sensitivities to, in *Caenorhabditis elegans* [Morgan, Sedensky, Thomas, Kiss], A649
- prolongs GABA-mediated inhibitory postsynaptic currents at synapses between cultured rat hippocampal neurons [Jones, Hornberger, Harrison], A580
- reduces depolarization-induced calcium entry into cultured rat hippocampal neurons [Bleakman, Jones, Roback, Hornberger, Radke, Miller, Harrison], A583
- halothane**
- aging affects kinetic estimates of volumes and perfusions for, in humans [Strum, Eger, Unadkat, Johnson, Carpenter], A375
- agonist specificity exhibited by, in attenuating canine cerebral artery contractions [Martin, Sill, Nelson], A541
- alteration by, of reactivity to PGF<sub>2a</sub> in human cerebral arteries [Reinstrup, Uski, Messeter], A200
- altered release and metabolism of norepinephrine in superfused canine saphenous veins in presence of [Kamath, Rorie, Tyce], A557
- assessing and characterizing hypnotic and analgesic effects of anesthetic drugs [Fukunaga, Fukunaga, Kikuta], A45
- attenuation of  $\alpha 1$  and  $\alpha 2$  adrenoceptor-mediated pressor responses by, differences in, in dogs [Tsuchida, Sato, Namiki], A551
- biphasic tension response to  $K^+$  caused by, in isolated pulmonary artery [Fehr, Schuler, Rhone, Larach], A566
- calcium agonist bay K8644 potentiates isoflurane/halothane *In Vitro* contracture response of malignant hyperthermia susceptible muscle to same extent [Adnet, Krivosic-Horber, Adamantidis, Reyford, Haudecoeur, Dupuis], A295
- carbon dioxide affects middle cerebral artery blood flow velocity during general anesthesia [Pashayan, Mahla, Richards], A172
- coronary blood flow during isoflurane and, comparison of, in chronically instrumented dogs [Khalil, Jones, Foex], A503
- decreases cytosolic ionized calcium concentration during acetylcholine-induced contraction of canine trachealis muscle [Jones, Housmans, Warner, Rehder], A639
- differential effects of, on brain C-fos and jun-B messenger RNA [Marota, Crosby, Uhl], A647
- differential effects of, on  $Ca^{2+}$  exchange in endothelial cells [Shayevitz, Williams, Varani], A1001
- differential sensitivity to, of genioglossus, intercostals, and diaphragm: comparison between kittens and adult cats [Ochiai, Guthrie, Motoyama], A925
- direct depression of myocardial function by, in isolated, perfused infant rabbit heart [Palmisano, Kampine, Stowe, Bosnjak], A926
- dose-dependent effects of, on CO<sub>2</sub> responses of inspiratory and expiratory bulbospinal neurons and phrenic nerve activity in dogs [Stuth, Tonkovic-Capin, Zuperku, Kampine], A1096
- dose-response relationship of ORG 9426 during [Oris, Vandermeersch, van Aken, Crul], A1063
- effect of, on canine cerebral arteries *In Vitro* [Brian, Kennedy], A615
- effect of, on canine tracheal smooth muscle: role of cytosolic  $Ca^{2+}$ , cAMP and protein kinase C [Yamakage, Namiki], A354
- effect of, on cortical magnetic motor evoked potentials [Sloan, Levin], A450
- effect of, on defibrillation threshold [Guo, Jones, Gelineau, Solomon, Handler], A574
- effect of, on dorsal aortic blood flow, in stage 24 chick embryo [Wojtczak, Hu, Clark], A561
- effect of, on intercellular communications between astrocytes [Mantz, Cordier, Desmonts, Giaume], A581
- effect of, on platelet interaction with coronary circulation [Gobeil, Blaise, Tanguay], A519
- effect of, on time course and amplitude of  $Ca^{2+}$  transients in electrically-stimulated cardiac myocytes [Wilde, Davidson, Knight], A366
- effect of, on time course and amplitude of SR  $Ca^{2+}$  release by caffeine in cardiac myocytes [Wilde, Davidson, Knight], A365
- effect of duration of, on pulmonary acid injury [Coleman, Rutter, Tait, Johnson, Knight], A998
- effects of, on  $Ca^{2+}$  homeostasis in oxidant-injured endothelium [Shayevitz, Williams, Varani], A1002
- effects of, on calcium and potassium currents in isolated smooth muscle cells of dog coronary arteries [Buljubasic, Rusch, Marijic, Kampine, Bosnjak], A370
- effects of, on conduction velocity in Purkinje fibers in dogs [Vodanovic, Turner, Marijic, Kampine, Bosnjak], A569
- effects of, on coronary collateral circulation in chronically instrumented dogs [Wouters, van Aken, Schreinemakers, Flameng], A504
- effects of, on retinal blood flow in cats [Roth], A377
- effects of, on single potassium channels in isolated smooth muscle cells of dog coronary arteries [Buljubasic, Marijic, Kampine, Bosnjak], A369
- effects of, on spinal cord protein kinase [Austin, Firestone], A1041
- effects on atelectasis, phrenic nerve stimulation during [Hedenstierna, Tokics, Lundquist, Andersson, Strandberg, Brismar], A129
- endo/epicardial flow ratio with [Cork, DiNardo, Hilwig, Kern], A505
- endogenous norepinephrine effect attenuated by, in isolated rabbit mesenteric veins [Stadnicka, Flynn, Bosnjak, Kampine], A572

- endothelial cell calcium mobilization altered by [Loeb, O'Brien, Longnecker], A533
- enhances GABA-activated chloride currents in cultured rat hippocampal neurons at clinically relevant concentrations [Harrison, Jones, Brooks], A1040
- fatty acid alterations in phospholipids of perfused rat liver by [Franks, Kruskal, England, Surber, Sastry], A337
- GABA-gated chloride flux enhanced by, in mice selectively bred for sensitivity to diazepam [Quinlan, Winter, Callaher, Firestone], A582
- halothane-epinephrine sensitization, alteration of alpha and beta receptor binding possible mechanism for [Skupski, Miletich, Minshall, Albrecht], A159
- halothane-mediated changes in intracellular antioxidant defenses and redox state, [Yousif, Shayevitz, Varani], A999
- halothane-oxidant interactions in *Ex Vivo* perfused rabbit lung: edema formation and eicosanoid production [Shayevitz, Johnson, Knight], A339
- hypocapnia-induced contraction of isolated dog cerebral artery more susceptible to, than to pentobarbital [Hatano, Nakamura, Toda, Nishiwada, Mori], A548
- influence of, on endothelium-dependent circulatory control *In Vivo* [Greenblatt, Loeb, Longnecker], A532
- inhalation, inhibition of brown fat heat production by [Ohlsson, Lindahl, Mohell, Cannon, Nedergaard], A340
- inhalational, decreases central catecholamine activity and improves ischemia outcome [Hannigan, Lingamneni, Miletich, Albrecht], A604
- inhalational, effect of on ischemic kidney, in rats [Yoshimura, Sameshima, Miyao, Oda, Yoshida], A335
- inhibition of Na/Ca exchange in heart cells by [Haworth, Goknur], A576
- inhibition of natural killer cell stimulation with interferon  $\alpha/b$  induced by [Markovic, Murasko, Knight], A996
- inhibitory effect of, on cytosolic  $Ca^{2+}$  increase and contraction in vascular smooth muscle of rat aorta [Tsuchida, Notsuki, Yamakage, Fujita, Namiki], A531
- inhibits vascular cell signalling independent of G-proteins [Sill, Uhl, Eskuri], A528
- initial experience of switchover to sevoflurane from, in pediatric anesthesia [Miyasaka, Muto, Takata, Sakai, Kondo, Sun], A1048
- interaction of epinephrine and, on caffeine-induced calcium transients from single ventricular myocytes [Knight, Wilde, Haney], A364
- is desflurane faster than? [Cote, Liu, Alifimoff, Landis], A17
- isoflurane *versus*, effect of  $PaCO_2$  on cerebral blood flow distribution during, in rat [Young, Barkai, Prohovnik, Nelson, Durkin], A170
- isolation of mutations that alter sensitivities to, in *Caenorhabditis elegans* [Morgan, Sedensky, Thomas, Kiss], A649
- ketorolac does not decrease MAC of, in rats [Rich, Schacterle, Moscicki, DiFazio, Adams], A769
- liver cytosolic proteins from halothane-treated mice recognized by antibodies in halothane hepatitis patients' sera [Lindsey, Martin, Pohl], A993
- MAC, reduction of, by epidural fentanyl, compared with intravenous fentanyl [Inagaki, Mashimo, Yoshiya], A323
- MAC of, effect of ethanol on, in humans [Slee, Cullen, Unadkat, Pavlin], A332
- may suppress action of G-protein, Gp, in endothelial cells [Robinson-White, Kobayashi], A995
- microsomal ethylmorphine N-demethylase activity inhibited by, in rat lung [Ahmad, Kartha], A336
- minimum effective dose of, influence of L-dopa on, in rat [Horn, Sastry, Franks], A333
- myocardial depression enhanced by, demonstrated by chronically infarcted rat hearts [Skeehan, Musch, Riley], A524
- neutrophil suppression with, using flow cytometry [Goolishian, Circeo, Teres, Boldt, Hall], A285
- open states of calcium release channel from human and porcine malignant hyperthermia increased by [Nelson], A301
- during perfluorochemical ventilation [Kimless-Garber, Wolfson, Carlsson, Shaffer], A361
- preserved coupling of CNS blood flow and metabolism during [Szabo, Crosby], A614
- prolongs GABA-mediated inhibitory postsynaptic currents at synapses between cultured rat hippocampal neurons [Jones, Hornberger, Harrison], A580
- pulmonary production of tumor necrosis factor during, in mice [Knight, Tait, Davidson, Remick, Johnson], A997
- reduced exposure to nitrous oxide and, by operating personnel during induction of anesthesia in children using double mask system [Weber, Unterberger, Gangoly], A927
- reduces depolarization-induced calcium entry into cultured rat hippocampal neurons [Bleakman, Jones, Roback, Hornberger, Radke, Miller, Harrison], A583
- regulation of intracellular pH in C fibers inhibited by [Kracke, Mills, Drake], A597
- relative potency of desflurane, isoflurane and, in triggering episodes of malignant hyperthermia in swine [Gammel, Wedel, Milde, Iaizzo], A296
- release of 5-hydroxytryptamine and thromboxane A2 from human platelets inhibited by, in humans [Blaise, Buluran], A520
- saturable binding of, to synaptosomal membranes of rat brain [El-Maghrabi, Echenhoff, Shuman], A373
- suppression of  $Ca^{2+}$  dependent  $K^+$  conductance in adrenal chromaffin cells by [Pancrazio, Lynch], A1038
- vasodilation in coronary vascular smooth muscle, role of potassium channels on [Larach, Schuler, Rhone], A527
- isoflurane**
- 1.0 MAC of, EEG does not predict movement in response to surgical incision at [Dwyer, Rampil, Eger, Bennett], A1025
- accuracy of EEG in predicting movement at incision during [Sebel, Bowles, Saini, Chamoun], A446
- aging affects kinetic estimates of volumes and perfusions for, in humans [Strum, Eger, Unadkat, Johnson, Carpenter], A375
- alteration by, of reactivity to PGF $2\alpha$  in human cerebral arteries [Reinstrup, Uski, Messeter], A200
- assessing and characterizing hypnotic and analgesic effects of anesthetic drugs [Fukunaga, Fukunaga, Kikuta], A45
- attenuation of  $\alpha 1$  and  $\alpha 2$  adrenoceptor-mediated pressor responses by, differences in, in dogs [Tsuchida, Sato, Namiki], A551
- brain potassium homeostasis preserved by, during induced hypotension and hypocapnia, in rats [Waaben, Kaiser, Rossen, Lundbaek, Husum, Hansen], A620
- calcium agonist bay K8644 potentiates isoflurane/halothane *In Vitro* contracture response of malignant hyperthermia susceptible muscle to same extent [Adnet, Krivosic-Horber, Adamantidis, Reyford, Haudecoeur, Dupuis], A295
- carbon dioxide affects middle cerebral artery blood flow velocity during general anesthesia [Pashayan, Mahla, Richards], A172
- changes in cerebral blood flow during, monitored by transcranial Doppler sonography [Werner, Hoffman, Kochs, Schulte am Esch, Albrecht], A616
- coherence analysis of EEG during [Levy, Canals-Curtis], A178
- combinations of fentanyl, N $_2$ O and, EEG prediction of arousal during anesthesia with [Dutton, Smith, Smith], A448
- comparative effects of desflurane and, on cerebral blood flow [Ornstein, Young, Ostapovich, Prohovnik, Stein], A209
- comparison of cerebral protective effects of mild hypothermia and, in model of incomplete forebrain ischemia [Sano, Patel, Drummond, Grafe, Cole], A602

- comparison of sevoflurane-N<sub>2</sub>O and propofol-isoflurane-N<sub>2</sub>O [Smith, Ding, White], A344
- coronary blood flow during halothane and, comparison of, in chronically instrumented dogs [Khalil, Jones, Foex], A503
- in deep extubation, minimum alveolar concentration for [Neelakanta, Miller, Anderson], A331
- at depths producing burst-suppression EEG pattern does not attenuate hemodynamic response to intubation [Spackman, Messick, Sharbrough], A355
- differential effect of, on T-cell subsets and antigen-presenting accessory cells *In Vitro* [Grun, Maurer, Torjman, Schieren, Maurer], A1000
- differential effects of, in isolated guinea pig hearts [Boban, Buljubasic, Stowe, Kampine, Bosnjak], A506
- differential effects of, on Ca<sup>2+</sup> exchange in endothelial cells [Shayevitz, Williams, Varani], A1001
- direct measurement of effects of, on hypoxic pulmonary vasoconstriction during one-lung-ventilation [Groh, Kuhnle, Kubler, Goetz, Peter], A341
- does not vasodilate rat thoracic aortic rings by EDRF or other cyclic GMP mediated mechanisms [Brendel, Proctor, Johns], A534
- dose-response for thermoregulatory sweating threshold and gain during [Washington, Sessler, Prager, McGuire, Merrifield, Hudson, Moayeri], A194
- dose-response relationship of ORG 9426 during [Oris, Vandermeersch, van Aken, Crul], A1063
- EEG effect of, potentiated by pancuronium, in dogs [Schwartz, Navedo, Berman], A792
- effect of, in pregnant sheep: uterine blood flow and fetal well-being [Stein, Masaoka, Wlody, Santos, Pedersen, Morishima, Finster], A851
- effect of, on baroreflex function in rabbit [Wilson, Bell, Quandt, Kampine], A1120
- effect of, on canine cerebral arteries *In Vitro* [Brian, Kennedy], A615
- effect of, on cortical magnetic motor evoked potentials [Sloan, Levin], A450
- effect of, on dorsal aortic blood flow, in stage 24 chick embryo [Wojtczak, Hu, Clark], A561
- effect of, on intercellular communications between astrocytes [Mantz, Cordier, Desmonts, Giaume], A581
- effect of, on time course and amplitude of CA<sup>2+</sup> transients in electrically-stimulated cardiac myocytes [Wilde, Davidson, Knight], A366
- effect of, on time course and amplitude of SR CA<sup>2+</sup> release by caffeine in cardiac myocytes [Wilde, Davidson, Knight], A365
- effect of, with N<sub>2</sub>O on cerebrospinal fluid pressure in patients with supratentorial mass lesions [Muzzi, Daltner, Losasso, Weglinski, Milde], A167
- effect of duration of, on pulmonary acid injury [Coleman, Rutter, Tait, Johnson, Knight], A998
- effects of, on Ca<sup>2+</sup> homeostasis in oxidant-injured endothelium [Shayevitz, Williams, Varani], A1002
- effects of, on conduction velocity in Purkinje fibers in dogs [Vodanovic, Turner, Marijic, Kampine, Bosnjak], A569
- effects of, on coronary collateral circulation in chronically instrumented dogs [Wouters, van Aken, Schreinemakers, Flameng], A504
- effects of, on regional blood flow distribution in rats [Habazettl, Conzen, Vollmar, Peter, Messmer], A549
- effects of, on spinal cord protein kinase [Austin, Firestone], A1041
- effects of, on transient outward potassium current in Purkinje fibers [Supan, Buljubasic, Marijic, Eskinder, Kampine, Bosnjak], A368
- elimination of, from membrane oxygenator during cardiopulmonary bypass [Eckenbrecht, Griffin, Quinn], A367
- endo/epicardial flow ratio with [Cork, DiNardo, Hilwig, Kern], A505
- endogenous norepinephrine effect attenuated by, in isolated rabbit mesenteric veins [Stadnicka, Flynn, Bosnjak, Kampine], A572
- endothelial cell calcium mobilization altered by [Loeb, O'Brien, Longnecker], A533
- enhancement of enzymatic phospholipid N-methylation in rat brain synaptosomes during [Franks, Sastry, Surber, England], A338
- enhances GABA-activated chloride currents in cultured rat hippocampal neurons at clinically relevant concentrations [Harrison, Jones, Brooks], A1040
- halothane *versus*, effect of PaCO<sub>2</sub> on cerebral blood flow distribution during, in rat [Young, Barkai, Prohovnik, Nelson, Durkin], A170
- hemodynamic changes during, in ASA I and ASA II surgical patients [Frink, Malan, Atlas, Dinardo, Brown], A156
- human liver volatile anesthetic defluorination: role of cytochrome P450IIE1 [Kharasch, Thummel], A350
- hypoxia during, effect of dexmedetomidine on cerebrovascular response to [McPherson, Traystman], A174
- influence of, on endothelium-dependent circulatory control *In Vivo* [Greenblatt, Loeb, Longnecker], A532
- infusion requirements of ORG 9426 in patients receiving [Shanks, Fragen, Ling, Pemberton, Dunn, Howard], A1068
- inhalational, decreases central catecholamine activity and improves ischemia outcome [Hannigan, Lingamneni, Milelich, Albrecht], A604
- inhalational, effect of on ischemic kidney, in rats [Yoshimura, Sameshima, Miyao, Oda, Yoshida], A335
- inhaled, differential effect of, on reflex mesenteric venoconstriction in normotensive and chronically hypertensive rabbit [Stekiel, Tominaga, Bell, Bosnjak, Kampine], A571
- inhibition of Na/Ca exchange in heart cells by [Haworth, Goknur], A576
- inhibition of natural killer cell simulation with interferon  $\alpha/b$  induced by [Markovic, Murasko, Knight], A996
- inhibitory effect of, on cytosolic Ca<sup>2+</sup> increase and contraction in vascular smooth muscle of rat aorta [Tsuchida, Notsuki, Yamakage, Fujita, Namiki], A531
- inhibits endothelium-dependent relaxation and cyclic GMP formation in rat aorta [Nakamura, Hatano, Toda, Mori], A530
- inhibits signal transduction in cultured vascular smooth muscle cells [Eskuri, Sill, Van Dyke, Uhl], A529
- inhibits vascular cell signalling independent of G-proteins [Sill, Uhl, Eskuri], A528
- isolation of mutations that alter sensitivities to, in *Caenorhabditis elegans* [Morgan, Sedensky, Thomas, Kiss], A649
- lack of bronchodilator effect of subanesthetic concentration of, in asthma [Mercier, Benhamou, Denjean], A972
- long propofol infusion *versus*, for ambulatory surgery, recovery and discharge after [Valanne, Korttila], A15
- MAC reduction of, by fentanyl [McEwan, Smith, Dyar, Goodman, Glass], A43
- modulates calcium channel current in spinal cord dorsal horn neurons [Heath, Berman] [Heath, Berman], A1037
- mutants of *Saccharomyces cerevisiae* resistant to [Peterson, Keil], A644
- neutrophil suppression with, using flow cytometry [Goolishian, Circeo, Teres, Boldt, Hall], A285
- nitrous oxide more potent cerebrovasodilator than, in humans [Lam, Slee, Cooper, Bachenberg, Mathisen], A168
- prolongs GABA-mediated inhibitory postsynaptic currents at synapses between cultured rat hippocampal neurons [Jones, Hornberger, Harrison], A580



- propofol *versus*: anesthesia for carotid endarterectomy [Paillot, Van Hemelrijck, Van Aken], A180
- relative potency of desflurane, halothane and, in triggering episodes of malignant hyperthermia in swine [Gammel, Wedel, Milde, Iaizzo], A296
- release of 5-hydroxytryptamine and thromboxane A<sub>2</sub> from human platelets inhibited by, in humans [Blaise, Buluran], A520
- splanchnic blood flow during, in rats [Vollmar, Conzen, Habazettl, Peter, Messmer], A550
- subanesthetic concentrations of nitrous oxide and, learning and responsiveness at [Dwyer, Bennett, Eger], A334
- verapamil associated with, left ventricular dysfunction due to: regional myocardial blood flow assessment [Arvieux, Fagret, Fargnoli, Nivet, Stueglitz, Comet], A507
- methoxyflurane**
- aging affects kinetic estimates of volumes and perfusions for, in humans [Strum, Eger, Unadkat, Johnson, Carpenter], A375
- human liver volatile anesthetic defluorination: role of cytochrome P450IIE1 [Kharasch, Thummel], A350
- sevoflurane**
- in closed circuit anesthesia [Bitoh, Ikeda], A343
- comparison of sevoflurane-N<sub>2</sub>O and propofol-isoflurane-N<sub>2</sub>O [Smith, Ding, White], A344
- effect of, in pregnant sheep: uterine blood flow and fetal well-being [Stein, Masaoka, Wlody, Santos, Pedersen, Morishima, Finster], A851
- effect of, on bronchoconstriction caused by histamine or acetylcholine [Kato, Ikeda], A973
- effects of, on regional blood flow distribution in rats [Habazettl, Conzen, Vollmar, Peter, Messmer], A549
- effects of, using low flow system on liver and kidney [Yasuda, Mishina, Miyano, Tanifuji, Amaki, Kobayashi], A345
- endo/epicardial flow ratio with, compared to other volatile agents [Cork, DiNardo, Hilwig, Kern], A505
- extended exposure to, serum inorganic fluoride after [Toriumi, Ozaki, Yasuda, Tanifuji, Amaki], A347
- hemodynamic changes during, in ASA I and ASA II surgical patients [Frink, Malan, Atlas, Dinardo, Brown], A156
- human liver volatile anesthetic defluorination: role of cytochrome P450IIE1 [Kharasch, Thummel], A350
- inhalational, effect of on ischemic kidney, in rats [Yoshimura, Sameshima, Miyao, Oda, Yoshida], A335
- initial experience of switchover from halothane to, in pediatric anesthesia [Miyasaka, Muto, Takata, Sakai, Kondo, Sun], A1048
- inorganic fluoride production following, in healthy surgical patients [Morgan, Frink, Ghantous, Gandolfi, Brown], A349
- neurologic deficit following incomplete ischemia reduced by, in rats [Werner, Kochs, Hoffman, Mollenberg, Schulte am Esch], A603
- prolonged administration of, effect of, on serum concentration of fluoride ion in patients [Kazama, Ikeda], A346
- prolonged inhalation of, serum and urinary inorganic fluoride levels after, in man [Kobayashi, Ochiai, Takeda, Sekiguchi, Fukushima], A348
- splanchnic blood flow during, in rats [Vollmar, Conzen, Habazettl, Peter, Messmer], A550
- Anesthetic techniques**
- anesthesia, not paralysis, increases mixed venous O<sub>2</sub> [Colonna-Romano, Horrow, Baker], A162
- balanced**
- epidural anesthesia/analgesia *versus* general anesthesia/patient-controlled analgesia: endocrine response to surgical stress [Norris, Parker, Breslow, Crowley, Frank, Rock, Christopherson, Beattie], A696
- regional *versus* general anesthesia, mortality and morbidity of: meta-analysis [Sorensen, Pace], A1053
- endobronchial**
- operative lung CPAP with univent bronchial blocker tube [Benumof, Gaughan, Ozaki], A120
- epidural**
- alpha-2-agonists, comparison of guanfacine and clonidine, in regard to duration of antinociception, and ventilatory and hemodynamic effects [Smith, Baudendistel, Gibbons, Schweiss], A655
- analgesia, antimicrobial properties in agents used for? [Feldman, Chapin, Turner, Contant], A835
- analgesia for labor, maternal temperature regulation during [Hortvet, Camann, Hughes, Bader, Datta], A849
- analgesic potency and action site of fentanyl, following gastrectomy [Inagaki, Mashimo, Yoshiya], A47
- anesthesia with bupivacaine-epinephrine mixture, maternal and fetal catecholamine levels following [Weinberg, Zakowski, Ramanathan], A846
- anesthesia/analgesia, *versus* general anesthesia/patient-controlled analgesia: endocrine response to surgical stress [Norris, Parker, Breslow, Crowley, Frank, Rock, Christopherson, Beattie], A696
- antinociceptive interactions between morphine and bupivacaine [Rattan, McDonald, Tejwani], A760
- baroreflex control of heart rate during high thoracic epidural anesthesia [Goertz, Seeling, Heinrich], A87
- blockade, effect of, on postoperative hypercoagulability [Gibbs, Crawford, Michalopoulos], A714
- bowel function following major colon surgery not delayed by [Hart, Faul, Buhman], A669
- bupivacaine, continuous, influence of, on perioperative fluid shifts [Burgess, Brooks, Wade, Perkins, Rodkey], A761
- butorphanol and fentanyl, effect of, on shivering during C-section [Chen, Kwan], A843
- catheter migration, prospective analysis of, in 1598 surgical cancer patients [deLeon-Casasola, Myers, Rempel, Bacon, Peppriell, Lema], A730
- clonidine, following cesarean section: effect of prior local anesthetic [Huntoon, Eisenach, Boese], A855
- clonidine, for refractory reflex sympathetic dystrophy [Rauck, Eisenach, Jackson, Speight, Southern], A657
- clonidine reduces fentanyl requirements and side effects in postoperative patients [Delaunay, Leppert, Dechaubry, Baubillier, Bonnet], A1086
- combining low dose morphine and clonidine prevents bladder size increase: cystographic study in rabbits [Wang, Li, Hiller], A634
- comparison of clonidine and bupivacaine for postoperative analgesia [Carabine, Milligan, Moore], A1083
- contaminated epidural catheter injection site: can it be cleaned for continued use? [Turner, Feldman, Chapin], A834
- continuous analgesia post-C/S: effect of diluent volume [Cohen, Amar, Pantuck, Pantuck, Landa, Widroff], A860
- continuous analgesia *versus* intravenous patient controlled analgesia: vital capacity after thoracotomy [Vanhoorebeek, Vertommen, Van Aken, Vandermeersch], A116
- continuous bupivacaine-fentanyl, nalbuphine ameliorates pruritus caused by, in postoperative patients [Newman, Dragisic, Lubenow, McCarthy, Ivankovich], A770
- continuous infusion of low-dose morphine for postoperative analgesia in children [Taylor, Boswell], A937
- continuous postoperative infusion, of 0.25% bupivacaine with or without opiates, unpredictability of sensory level regression during [Ferrante, Fanciullo, Kistler, Katz, Conception], A750
- dexmedetomidine, pharmacokinetic and dynamic studies of [Bucklin, Eisenach, Tucker], A662

- effects of, on postoperative morphine consumption [Samra, Willis, Ganta, Pundit], A666
- effects of pH-adjustment and warming of bupivacaine on onset and duration of: prospective study in 270 children [Mansoor, Dalens], A938
- estimating distance from skin to lumbar epidural space in infants and children [Ikemura, Yamashita], A943
- fentanyl, after thoracotomy, shorter hospital stay with [Guinard, Mavrocordatos, Cuttat, Chiolero], A698
- fentanyl, intravenous compared with, reduction of halothane MAC by [Inagaki, Mashimo, Yoshiya], A323
- fentanyl, intravenous *versus*: stress response after thoracotomy [Mavrocordatos, Guinard, Chiolero], A697
- fentanyl, PCA morphine and, in post-thoracotomy pain, double-blind comparison of [Benzon, Wong, Belavic, Locicero], A712
- fentanyl and bupivacaine mixture, stability of [Dawson, Bjorksten, Duncan, Barnes, Hellyar], A746
- fentanyl and sufentanil, double-blind comparison of, with intravenous sufentanil for abdominal surgery pain management [Chrubasik, Geller, Graf, Zbinden, Thomson], A752
- fentanyl and sufentanil with bupivacaine and neonatal effects [Loftus, Hill, Cohen], A856
- fentanyl does not worsen post-cesarean section analgesia when administered before epidural morphine [Vincent, Chestnut, Choi, Coffin, Ostman, Bates, Laszewski], A861
- fentanyl-bupivacaine for cesarean section, placental transfer and neonatal effects of [Bang, Helbo-Hansen, Lindholm, Klitgaard], A847
- functional measure of epidural space [Bevacqua, Slucky, Felling, Ontell], A724
- hypotension and uterine blood flow worsened by, during hemorrhage, in gravid ewes [Vincent, Chestnut, Sipes, Thompson, Debruyne, Bleuer, Chatterjee], A823
- hypotensive, hormonal responses during [Zayas, Sharrock, Blumefeld, McDonald, Sealy], A112
- intravenous alfentanil *versus*, by PCA in postoperative patients [Hongnat, Bellenfant, Levy, Alfonsi, Chauvin], A754
- intravenous butorphanol *versus*, for post-cesarean delivery analgesia [Loferski, Camann, Stone, Datta], A848
- is postthoracotomy pain syndrome affected by postoperative pain relieving technique? [Miguel, Hubbell], A763
- labor analgesia, unilateral blockade during, risk factors associated with [Langeron, Hamza, Narchi, Lecoq, Smida], A832
- low dose morphine, combination of intramuscular diclofenac sodium and, for postcesarean analgesia [Sun, Wu, Lin, Chang, Mok], A745
- low dose morphine, proglumide potentiates analgesic effect of [Chen, Tsai, Mok, Lippmann], A686
- lumbar, effect of puncture level on L5 and S1 nerve roots blockade during [Bouguet, Fabas, Riou, Viars], A725
- lumbar anatomy, new look at [Hogan], A716
- lumbar anesthesia, 5% hypertonic saline allows rapid fluid loading before [Ph Veroli, Mazoit, Benhamou], A715
- lumbar epidural fentanyl reduces pain following thoracic surgery, pre-incisional *versus* post-incisional: randomized double-blind crossover study [Kavanagh, Katz, Sandler, Nierenberg, Panos], A1087
- lumbar steroid injections, vital signs during and after [Romanoff, Johnson, Ellis, Butzin], A723
- morphine, HSV recurrent infection following: effect of morphine on herpes simplex virus-specific cytotoxic T lymphocyte function [Bonneau, Sheridan, McDonald, Glaser], A590
- morphine, side effects after, nalbuphine better than naloxone for treatment of [Cohen, Archer, Ratner, Kreitzman, Mignano], A845
- morphine with butorphanol in pediatric patients [Lawhorn, Brown], A940
- in newborn, lidocaine and bupivacaine plasma levels after [Rochette, Beauvoir, Desh, Biboulet, d'Athis], A917
- opiates for postoperative pain relief in pediatric patients: morphine *versus* fentanyl [Lejus, Roussiere, Testa, Ganansia, Ricard], A941
- opioids, comparison of intravenous opioids and, in postoperative management of pediatric anti-reflux surgery [McNeely], A689
- patient-controlled analgesia, 0.0625% bupivacaine/0.0002% fentanyl via, for pain of labor and delivery [Ferrante, Barber, Segal, Hughes, Datta], A737
- patient-controlled analgesia, pharmacokinetic profiles under morphine, methadone, fentanyl, and sufentanil [Chrubasik, Chrubasik, Magora], A753
- patient-controlled analgesia during labor, double-blind patient evaluation of [Price, Fontenot, Weinger, Reisner, Henry], A836
- patient-controlled analgesia *versus* epidural analgesia with morphine or bupivacaine/morphine: postoperative outcome after abdominal surgery [Rockemann, Seeling, Bothner, Eifert, Zeininger], A1088
- peripheral and cerebral hemodynamic effects of, in newborn lambs [Yaster, Koehler, Traystman], A918
- postoperative analgesia, for chronic cancer patients taking oral narcotics [de Leon-Casasola, Myers, Donaparthi, Bacon, Peppiell, Rempel, Lema], A665
- seizures following postdural puncture headache in postpartum women: series with suggested etiology [Shearer, Cunningham, Wallace, Giesecke], A852
- skin surface warming before epidural block bunts anesthetic-induced hypothermia [Glostenm, Hynson, Sessler, McGuire], A854
- sufentanil, administered during labor and delivery, maternal and neonatal plasma levels after [Kick, Vertommen, van Aken, Gryseels], A837
- sufentanil, does it spread rostrally in spinal axis? [Petty, Stevens, Hill, Hahn, Kao], A744
- systemic effects of clonidine and bupivacaine [Carabine, Milligan, Moore], A661
- technique used to identify epidural space, does it affect quality of analgesia?: air *versus* saline [Huffnagle, Norris, Leighton, Arkoosh, de Simone], A831
- tension applied to lumbar epidural catheters during removal is much greater with patient sitting *versus* lying [Blackshear, Gravenstein, Radson], A833
- thoracic, dopamine or norepinephrine infusion during? differences in hemodynamic effects and plasma norepinephrine levels [Lundberg, Biber, Martner, Raner, Winso], A740
- thoracic, effect of, on pulmonary function in normals [Speight, Rauck, Mann], A729
- thoracic, effects of, on metabolism of ischemic myocardium induced by intracoronary injection of endothelin, in dogs [Fujita, Tsuchida, Kawamata, Kobayashi, Namiki], A515
- triamcinolone causes prolonged and severe suppression of pituitary-adrenal axis [Kay, Raff, Findling], A694
- using bupivacaine and opioid *versus* subcutaneous morphine: postoperative pulmonary complications after abdominal surgery [Farhat, Thomas, Rey, Bourgain, Desruennes, Jayr], A126
- which vasopressor should one give to treat hypotension during magnesium sulfate infusion and? [Chestnut, Vincent, Sipes, Debruyne, Bleuer, Chatterjee], A824
- epidural, caudal**
- in children: a survey [Gunter], A936
- continuous anesthesia with 2-chloroprocaine for premature infants undergoing inguinal hernia repair [Henderson, Sethna, Berde], A916

- fentanyl-bupivacaine for analgesia in children [Campbell, Yentis, Fear, Bissonnette], A939
- steroids, for treatment of pelvic pain due to cancer [Maytorena, Sierra, Prihoda, Hoffman, Tingle], A727
- thoracic epidural anesthesia via caudal approach in children [Gunter, Eng], A1049
- hypotensive**
- adenosine, renal blood flow and function during controlled hypotension with, in dogs under halothane anesthesia [Jarnberg, Jamond, Westman, Woods], A552
- adenosine-induced, cerebral blood flow during, in human [Lam], A173
- direct arteriolar and venular dilating effects of various vasoactive agents [Chen, Chang, Guth], A564
- epidural anesthesia, hormonal responses during [Zayas, Sharrock, Blumefeld, McDonald, Sealy], A112
- isoflurane preserves brain potassium homeostasis during, in rats [Waaben, Kaiser, Rossen, Lundback, Husum, Hansen], A620
- manual *versus* automatic control in induction and maintenance of [Scanlon, Martin, Smith], A462
- sodium nitroprusside, renal blood flow and function during controlled hypotension with, in dogs under halothane anesthesia [Jarnberg, Jamond, Westman, Woods], A552
- vital organ blood flow during [Kick, van Aken, Wouters, Verbeselt, an Hemelrijck], A625
- hypothermia**
- deep, actual brain temperature during, recorded at standard monitoring sites [Stone, Young, Smith, Solomon, Ostapkovich, Wang], A483
- mild, comparison of cerebral protective effects of isoflurane and, in model of incomplete forebrain ischemia [Sano, Patel, Drummond, Grafe, Cole], A602
- thiopental loading and hypothermic circulatory arrest for complex cerebral artery aneurysm surgery [Stone, Young, Solomon, Smith, Ostapkovich], A54
- induction**
- effect of pharyngo-laryngeal topical lidocaine on swallowing reflex [Dalibon, Dureuil, Montravers, Ducros, Desmots], A125
- effects of alfentanil on cardiovascular and hormonal stress response to tracheal intubation [Miller, O'Brien, Martineau, Abou-Hamad, Hull, Greenway, Hindmarsh], A82
- intubation conditions and time-course of action of ORG 9426 Vandembrom, Wierda, Huizinga, Hennis], A788
- ketanserin does not decrease hemodynamic response to intubation in healthy unpremedicated patients [Schwieger, Forster, Tassonyi], A146
- ORG 9426: onset, intubating conditions, and clinical duration [Tulloch, Wilks, Bandom, Cook], A789
- parents' response to observation of, in their children [Honig, aguire, Hannallah], A1050
- radiological prediction of difficult intubation: posterior CO-1 and C1-2 Gaps [Calder, Calder, Crockard], A190
- rapid sequence, comparison of fentanyl, esmolol, and their combinations as anesthetic adjuncts during [Chung, Sinatra, Halevy, Paige, Silverman], A155
- semi-emergent intubation: hemodynamic changes [Mort, Brakoniecki], A1017
- smokers more prone to arrhythmias than nonsmokers during rapid sequence [Martin, Stevens], A91
- with thiopental, hyperglycemia following, in healthy women [Amar, Shamoan, Lazar, Salama, Frishman], A206
- tracheal intubation after propofol anesthesia without neuromuscular blocker is not practical [Kothary, Pandit, Lebenbom-Mansour, Levy, Randel], A1111
- vital capacity rapid inhalation induction with desflurane, effects of premedication on emergence characteristics and patient acceptance [Hartman, Kelly, Embree, Sharp, Artusio], A23
- insufflation**
- of O<sub>2</sub>, low and high flow tracheal, supports oxygenation in apneic dogs after TTX poisoning [Mackenzie, Barnas, Smalley, Park, Miller], A284
- prolonged apneic oxygenation, changes in systemic and pulmonary hemodynamics and acid—base balance during [Ikdea, Schweiss], A1117
- intra-articular bupivacaine and morphine, comparison of, for analgesia following arthroscopic knee surgery [Dickstein, Raja, Johnson], A767
- intravenous**
- catheterization, 1% lidocaine with and without sodium bicarbonate for attenuation of pain of skin infiltration and [Ferrante, Steinbrook, Hughes, Kistler, Manzi], A736
- dexmedetomidine, pharmacokinetic and dynamic studies of [Bucklin, Eisenach, Tucker], A662
- modifying stress response during [Monk, Ding, Smith, White], A42
- opioids, comparison of epidural opioids and, in postoperative management of pediatric anti-reflux surgery [McNeely], A689
- patient controlled anesthesia for prolonged conscious sedation [Monahan, David, Finley, Buhrman], A32
- neurolept**
- effect of neuroleptanalgesia on motor potentials evoked by transcranial magnetic stimulation in primates [Ghaly, Stone, Kartha, Asokan, Alexander], A595
- pulsed iontophoretic delivery of angiotensin-converting enzyme inhibitor [Zakzewski, Amory, Li, Jasaitis], A371
- regional**
- 3-in-1 block for postoperative analgesia following anterior cruciate ligament reconstruction [Bingham, Indelicato, Duke, Merrell], A735
- are anesthesia residency programs still failing to teach this? [Kopacz], A759
- bilateral infraorbital block with 0.05% bupivacaine in children [Nicodemus, Ferrer, Cristobal, de Castro], A690
- brachial plexus, comparative study of 0.25% ropivacaine and 0.25% bupivacaine for [Hickey, Rowley, Candido, Ramamurthy, Winnie], A711
- does it significantly delay surgery? retrospective study [Nichols, Nagel, Gantt], A884
- effects of, on postoperative morphine consumption [Samra, Willis, Ganta, Pundit], A666
- general anesthesia *versus*, mortality and morbidity of: meta-analysis [Sorensen, Pace], A1053
- how postoperative nurses feel about [Seltzer, Lessin], A755
- interscalene block complications [Urban, McDonald, Urquhart, Sharrock], A733
- intrapatellar nerve block for chronic pain following diagnostic knee arthroscopy [Trankina], A738
- is postthoracotomy pain syndrome affected by postoperative pain relieving technique? [Miguel, Hubbell], A763
- modified Bier block abolishes local pain associated with propofol injection [Holak, Mangar], A732
- prostatic block, initial results with—new anesthetic for transurethral balloon dilation [Belani, Reddy], A731
- sustained release of bupivacaine from biodegradable polymer matrix, prolonged sciatic nerve blockade with [Masters, Berde, Dutta, Langer], A765
- regional, axillary brachial plexus**
- for emergency procedures in young children [Tryba, Haensch, Zenz], A757
- single or multiple injections? [Bussac, Akaga, Lena, Legre, Francois], A720
- regional, brachial plexus**
- blockade, clonidine added to mepivacaine for: minimal effective dose prolonging duration of both anesthesia and analgesia [Bartholomee, Singelyn, Broka, Gouverneur], A1084

**regional, intercostal**

- nerve block by jet injection [Katz, Knarr, Juneja], A726  
single-dose and continuous microcatheter, in former preterm infants [McDonald, Berkowitz, Santini, Alverio], A911

**spinal**

- with 27-gauge needles for outpatient knee arthroscopy in patients 12 to 18 years old [Kang, Romeyn, Shenton, Tompkins, Furlano], A1103  
antinociceptive effects of intrathecal 3 $\alpha$ -hydroxy-5 $\alpha$ -pregnan-20-one in rat mechanical visceral pain model [Colburn, Winfree, Coombs, Deleo, Twitchell], A594  
catheter size, local anesthetic dosing and: retrospective review [Bevacqua, Slucky, Nemeč], A702  
catheters, where do they go? [van Gessel, Forster, Gamulin], A701  
comparison of general anesthesia and, in former premature infant [Krane, Haberkern, Jacobson], A912  
continuous: rationale for associating meperidine to lidocaine during induction phase [Maurette, Bonada, Favarel-Garrigues, Ph Erny], A704  
dexmedetomidine, pharmacokinetic and dynamic studies of [Bucklin, Eisenach, Tucker], A662  
hydroxy-propyl- $\beta$ -cyclodextrin as, systemic studies on use of: opioid analgesia in rats [Jang, Yaksh, Hill], A376  
incidence of postdural puncture headache in obstetrical patients: comparing 24-gauge and 22-gauge Sprotte needles [Leeman, Sears, O'Donnell, Reisner, Jassy, Harmon, O'Donnell, Kelleher, Stanos], A853  
intrathecal fentanyl does not improve intrathecal morphine analgesia after cesarean section [Boerner, Norris, Leighton, Arkoosh, Torjman], A858  
intrathecal fentanyl for labor analgesia [Zakowski, Goldstein, Ramanathan, Turndorf], A840  
intrathecal injection of 8% tetracaine, histologic changes following, in neonatal rabbit [Britton, Nagel, Rice, Eighmy, Muldoon], A913  
intrathecal labor analgesia, comparison of fentanyl, meperidine, and sufentanil for [Honet, Arkoosh, Hufnagle, Norris, Leighton], A839  
intrathecal meperidine associated with bupivacaine: dose-range study [Bonnet, Nguyen Thi, Orliaguet, Liu, Delaunay], A747  
intrathecal morphine and clonidine, significant synergism between, for visceral antinociception [Harada, Nishioka, Kitahata, Collins], A660  
intrathecal morphine and fentanyl with and without bupivacaine for control of postoperative pain after major abdominal surgery [Gwitz, Peneff], A672  
intrathecal sufentanil and fentanyl for labor analgesia, comparison between [Sharkey, Arkoosh, Norris, Honet, Leighton], A841  
intrathecal sufentanil/tetracaine for cesarean section surgery [Pan, Mok], A743  
lidocaine: optimal agent for inguinal herniorrhaphy in infants [Sukhani, Ramamoorthy, Wahood, Black], A914  
model study of local anesthetic distribution: explanation for cauda equina syndrome following continuous spinal anesthesia [Rigler, Drasner], A703  
in newborns: bupivacaine plasma concentrations [Beauvoir, Rochette, Desh, Galy, d'Athis], A968  
pediatric, without supplement: in search of optimal drug and dose [Ramamoorthy, Sukhani, Black], A915  
placement of continuous subarachnoid catheters, causes for difficulty with [Ata, Shulman], A1092  
post-dural puncture headache, theophylline for [Schwalbe, Schiffmiller, Marx], A1082  
for postpartum tubal ligation: meperidine *versus* lidocaine [Honet, Costello, Norris, Arkoosh, Leighton], A859

- prolongation of: lipid drug carrier as slow delivery system [Langerman, Grant, Zakowski, Turndorf], A684  
spinal catheter does not reduce post-spinal headache after cesarean section [Blaise, Cournoyer, Perrault, Bedard, Petit, Landry], A857  
Sprotte *versus* Quincke tip needles in outpatients, randomized comparison of [Broome, Schapiro], A1104  
tetracaine, should it be abandoned?: post-anesthesia care unit stay following TURP [Mychaskiw, Chung, O'Connor, Perlstein], A890  
trial of therex implantable pump delivered intrathecal MS in cancer pain control [Coombs, Saunders, Maurer, Vernier, Ahles], A741  
therapeutic suggestions administered during general anesthesia, ineffectiveness of [Ghoneium, Block, Sum Ping, Ali], A1027  
transdermal fentanyl, bioavailability and absorption rate of, [Fiset, Haack, Shafer], A326

**Anesthetists, nurse. See under Personnel****Angiotensin. See under Pharmacology; Polypeptides****Anoxia. See under Brain****Antagonists, miscellaneous****benzodiazepines**

- effect of flumazenil on lidocaine-induced convulsion in rats [Yokoyama, Benson, Goto, Unruh, Arakawa], A728  
efficacy of additional flumazenil after ambulatory general anesthesia with midazolam [Bizzarri-Schmid, Philip, Manzi, Dedrick, Mallampati, Mushlin], A30  
evaluation of incomplete response to flumazenil [Rupp, Knopes, Carpenter, Stephenson, Breen], A46  
flumazenil improves midazolam impaired cognitive function [Ritter, Hoshizaki, Stead], A37  
flumazenil in treatment of drug overdose [Weinbroum, Halpern, Sorkine, Rudick, Geller], A268  
reversal of midazolam-induced anesthesia by flumazenil during stereotaxic thalamic stimulation and [Berberich, Orliaguet, Nguyen, Rostaing, Duvaldestin], A189

**Antagonists, narcotic****methylaltraxone**

- ganglionic blockade induced by, in dog [Foss, Orelind], A637  
pharmacokinetics of, new opioid antagonist [Foss, Roizen, Moss, Murphy], A360

**nalbuphine**

- better than naloxone for treatment of side effects after epidural morphine [Cohen, Archer, Ratner, Kreitzman, Mignano], A845

**nalmefene**

- comparison of potency and duration of action of naloxone and [Glass, Jhaveri, Quill, Omoigui, Bowers, Leonard, Martel], A380

**naloxone**

- comparison of potency and duration of action of nalmefene and [Glass, Jhaveri, Quill, Omoigui, Bowers, Leonard, Martel], A380  
nalbuphine better than, for treatment of side effects after epidural morphine [Cohen, Archer, Ratner, Kreitzman, Mignano], A845  
reverses effects of fentanyl on evoked spinal and cortical potentials for innocuous and noxious electrical stimuli, in rabbit [Lee], A652

**Antagonists, neuromuscular relaxants****edrophonium**

- electrophysiological study on antagonism of d-tubocurarine-induced neuromuscular blockade by [Narimatsu, Ohta, Iwasaki, Namiki], A796

**neostigmine**

- electrophysiological study on antagonism of d-tubocurarine-induced neuromuscular blockade by [Narimatsu, Ohta, Iwasaki, Namiki], A796

reversal of deep neuromuscular blockade with 40 $\mu$ g/kg *versus* 70 $\mu$ g/kg neostigmine in infants and children [Bires, McGregor], A964

**Antibiotics**  
erythromycin  
effects of preoperative prophylaxis for ambulatory laparoscopy [Narchi, Elhaddoury, Locatelli, Benhamou], A22

**Anti-diuretic hormones.** *See under* Hormones

**Antiemetics.** *See under* Vomiting

**Apnea.** *See under* Ventilation

**Aprotinin.** *See under* Pharmacology

**Arrhythmia.** *See under* Heart

**Arterial catheters.** *See under* Equipment

**Arteries**  
cannulation  
radial artery, acute exacerbation of carpal tunnel syndrome following [Martin, Mineo, Sharrock, Sobel], A473  
radial artery, long-term, thrombotic risk of, two different canulae [Auffray, Martin, Lambert, Saux, Gouin], A892  
radial artery, reactive hyperemia produces superior anatomic and flow characteristics for [Joseph, Clark, Boerner, Torjman, Lessin, Seltzer], A475  
human mesenteric, vascular smooth muscles of, effects of protamine on [Akata, Kodama, Matsuyama, Takahashi, Yoshitake], A75  
phosphodiesterase inhibitors dilate human internal mammary artery *In Vitro* [Levy, Salmenpera, Meyer, Harrison], A1118  
propofol-induced arterial compliance increase accounts for systolic arterial pressure decrease [Dupuy, Schurando, Payen], A144

radial  
cannulation, acute exacerbation of carpal tunnel syndrome following [Martin, Mineo, Sharrock, Sobel], A473  
insertion of cannula, reactive hyperemia produces superior anatomic and flow characteristics for [Joseph, Clark, Boerner, Torjman, Lessin, Seltzer], A475  
long-term cannulation, thrombotic risk of, two different canulae [Auffray, Martin, Lambert, Saux, Gouin], A892  
vascular wall, absorption of local anesthetics via: *In Vitro* study [Tambakis, Tadoori, Lovett, Doss, Pillalamari, Chaudhry, Gintautas, Abadir], A768  
walls of, transfer of morphine and fentanyl across [Bernards, Hill], A685

**Artificial ventilation.** *See under* Ventilation

**Aspiration.** *See under* Complications

**Aspirin.** *See under* Pharmacology

**Asthma.** *See under* Lung

**Ataractics**  
phenothiazines  
nicotinic mechanism may underlie antiemetic properties of [Dodson, Braswell], A636

**Atelectasis.** *See under* Lung

**Atracurium.** *See under* Neuromuscular relaxants

**Atrial natriuretic polypeptides.** *See under* Polypeptides

**Autotransfusion.** *See under* Transfusion

**Axillary brachial plexus block.** *See under* Anesthetic techniques, regional

B

**Bacteremia.** *See under* Infection

**Balanced anesthesia.** *See under* Anesthetic techniques

**Barbiturates.** *See under* Hypnotics

**Baroreceptors.** *See under* Reflexes

**Benzodiazepines.** *See under* Antagonists, miscellaneous; Hypnotics

**Beta-adrenergic agonists.** *See under* Sympathetic nervous system

**Beta-adrenergic antagonists.** *See under* Sympathetic nervous system

**Biliary tract surgery.** *See under* Anesthesia

**Blood**  
aminocaproic acid  
what dose of tranexamic acid is optimally hemostatic? [Horrow, Van Riper, Parmet, Whooley], A986

anemia  
in chronic ICU patient, transfusion requirement and role of phlebotomy [Gettinger, Parsonnet, Corwin], A239  
hematologic and cardiovascular and side effects of preoperative use of erythropoietin in adolescents undergoing scoliosis surgery [Rothstein, Roye, Verdisco], A959  
sickle cell anemia, preoperative transfusion study in: preliminary report [Haberker, Vichinsky], A871

coagulation  
anti-coagulation, management of, during cardiopulmonary bypass [Urban, Gordon, Farrell, Shaffer], A437  
bedside PT and PTT monitor, clinical validation of [Reich, DePerio], A430  
blood loss and patterns of, influence of aprotinin on, in infants undergoing surgery for congenital heart defects [Mossinger, Dietrich, Spannagel, Jochum, Richter], A77  
calculating protamine heparin reversal ratio [Murray, Hampton, Hargovan, Wright], A62  
cephapirin-induced, assessment of duration of abnormalities as measured by thromboelastograph [Bauerle, Mongan, Hoskin], A70  
comparison of ACT and TEG in patients receiving autologous platelet-rich-plasma during cardiac surgery [Wong, Jones, Wade], A434  
comparison of thromboelastography and platelet aggregometry [Tuman, McCarthy, Patel, Patel, Ivankovich], A433  
consumptive, as predictor of outcome in purpura fulminans [McManus, Chruchwell], A286  
correlation between prothrombin time and degree of isovolemic hemodilution [Mortelmans, Vermaut, Mulier, Van Aken], A429  
defects in, in neonates during CPB [Kern, Morana, Sears, Hickey], A63  
desmopressin does not decrease bleeding after aspirin [Horrow, Van Riper, Parmet, Osborne], A985  
does anesthetic technique affect hemostasis after cardiac surgery? [Salmenpera, Kuitunen, Hynynen, Heinonen, Fyhrquist], A74  
does low-dose aprotinin reduce blood loss following cardiopulmonary bypass? [Benmosbah, Madi, Castel, Kiefer, Cousin], A983  
effect of aprotinin on fibrinolysis during orthotopic liver transplantation [Tartiere, Deshayes, Samba, Le Querrec, Gerard], A218  
effects of protamine on ACT and antithrombin III-heparin complex during cardiac surgery [Inada, Aoki, Kohama, Aoki, Takanashi, Iwahashi, Furuta], A78  
effects of protamine on vascular smooth muscles of human mesenteric artery [Akata, Kodama, Matsuyama, Takahashi, Yoshitake], A75  
evaluation of intraoperative monitoring of prothrombin time and activated partial thromboplastin time with new compact monitor [Samama, Faure, Riou, Ankri, Arock, Guillosson, Viars], A438  
fibrin formation during CPB with and without circulatory arrest in operations of congenital heart diseases [Dietrich, Spannagel, Mossinger, Richter], A76  
during liver transplantation, implications for: hepatic regulation of fibrinolysis [Kelley, Bissell], A565  
low dose aprotinin or tranexamic acid treatment in cardiac surgery [Isetta, Samat, Kotalche, Jourdan, Grimaud], A80

- modification of hemostatic parameters during cardiopulmonary bypass: effects of high-dose aprotinin [Gardaz, Hauert, Chassot, Parise, Bernath, Bachmann], A991
- natural anti-coagulant levels following major vascular surgery [Gibbs, Crawford, Michalopoulos], A72
- perioperative rheological and fibrinolytic changes [Janvier, Freyburger, Winnock, Bosseau, Erny], A79
- post-bypass bleeding, prevention of, with cyklokapron and amicar [Karski, Teasdale, Carroll, Glynn], A275
- postoperative hypercoagulability, effect of epidural blockade on [Gibbs, Crawford, Michalopoulos], A714
- predicting bleeding in CPB patients, sensitivity and specificity of APTT and PT by portable laser photometer in [Nuttall, Oliver, Beynen, Nichols], A431
- predilution and titrated inhibition of platelet aggregation: principle for hemofiltration in immediate postoperative period [Hodl, Chiari, Muller, Legat, Zimpfer], A436
- skin tests correlation with antibodies to protamine [Horrow, Levit, Freeland, Began, Henry], A61
- studies in parturient: how do we practice? [Voulgaropoulos, Palmer], A1073
- thromboelastographic fibrinolysis does not correlate with levels of D-dimers after cardiopulmonary bypass [Whitten, Allison, Latson, Elmore, Gulden, Burkhardt, Hyndman], A432
- what dose of tranexamic acid is optimally hemostatic? [Horrow, Van Riper, Parinet, Whooley], A986
- whole blood clotting analysis, effect of delay and storage on, as determined by thromboelastography [Rocke, Orlikowski, Murray], A428
- erythrocytes**
- In Vivo* survival studies after in-line microwave warming [Connolly, Allen, Ramberg, Grabow, Carr, Schwaitzberg], A1115
- flow**
- dorsal aortic, effect of halothane and isoflurane on, in stage 24 chick embryo [Wojtczak, Hu, Clark], A561
- mesenteric venoconstriction in response to celiac ganglion stimulation, role of  $\alpha$ -adrenoceptor subtype during [Tominaga, Stekiel, Bosnjak, Kampine], A570
- organ, effect of brain death on [Ali, Gelb], A210
- peripheral and cerebral hemodynamic effects of epidural anesthesia in newborn lambs [Yaster, Kochler, Traystman], A918
- hemodilution**
- during bone marrow harvest in children as means of avoiding homologous blood transfusion [Perez de Sa, Bekassy, Schou, Werner], A1052
- cardiac compensation during, effect of coronary stenosis on [Crystal, Levy, Eckel, Kim, Chavez], A516
- critical level of, in myocardium with compromised coronary blood flow: study on regional function and retransfusion [Spahn, Smith, Menius, McRae, Veronee, Leone], A517
- isovolemic, degree of, correlation between prothrombin time and [Mortelmans, Vermaut, Mulier, Van Aken], A429
- isovolemic, supply-dependent oxygen consumption and mixed venous oxyhemoglobin saturation during, in pigs [Rasanen], A260
- isovolemic, with 6% hydroxyethyl starch during elective total hip replacement, increased homologous blood requirement after (Singelyn, Gouverneur), A73
- low postoperative hematocrit associated with cardiac ischemia in high-risk patients [Christopherson, Frank, Norris, Rock, Gottlieb, Beattie], A99
- normovolemic, rationale for, day before surgery [Maurette, Napolitano, Gadrat, Ph Dieu, Macouillard], A906
- preoperative normovolemic, by TEE in coronary artery disease, evaluation of effects of [Catoire, Saada, Gormezano, Pichaud, Bonnet], A106
- heparin**
- calculating protamine heparin reversal ratio [Murray, Hampton, Hargovan, Wright], A62
- leukocytes**
- cardiac surgical patients plasma enhances oxygen free radical production in neutrophils [Nakamura, Bonventre, Inada, deBros, Shibata, Kono, Philbin], A95
- CPB induces increased leukocyte adhesion receptors but not TNF- $\alpha$  [Rinder, Mathew, Bonan, Hines, Smith], A59
- human polymorphonuclear, adenosine inhibits oxygen free radical production of, by action as calcium antagonist [Thiel, Bardenheuer], A1016
- human polymorphonuclear, superoxide anion production of, potentiation of adenosine by pentoxifylline in inhibition of [Thiel, Becker, Bardenheuer], A230
- intracellular antioxidant defenses and redox state, halothane-mediated changes in [Yousif, Shayevitz, Varani], A999
- neutrophil suppression with halothane and isoflurane using flow cytometry [Goolishian, Circeo, Teres, Boldt, Hall], A285
- pentobarbital inhibits  $Ca^{2+}$ -sensitive secretion in basophils [Robinson-White], A994
- platelet-leukocyte binding on cardiopulmonary bypass [Rinder, Mathew, Bonan, Smith], A58
- pulmonary production of tumor necrosis factor during halothane anesthesia in mice [Knight, Tait, Davidson, Remick, Johnson], A997
- In Vivo* modulation of human neutrophil function by pentoxifylline in septic patients [Oismuller, Mayer, Steltzer, Michsche, Hammerle], A233
- loss**
- coagulation patterns and, influence of aprotinin on, in infants undergoing surgery for congenital heart defects [Mossinger, Dieurich, Spannagel, Jochum, Richter], A77
- does low-dose aprotinin reduce blood loss following cardiopulmonary bypass? [Benmosbah, Madi, Castel, Kiefer, Cousin], A983
- platelet function following surgery involving [Gibbs, Crawford, Michalopoulos], A71
- lymphocytes**
- herpes simplex virus-specific cytotoxic T lymphocyte function, effect of morphine on: possible mechanism involved in HSV recurrent infection following epidural morphine administration [Bonneau, Sheridan, McDonald, Glaser], A590
- natural killer cell simulation with interferon  $\alpha$ /b, halothane and isoflurane induced inhibition of [Markovic, Murasko, Knight], A996
- T-cell subsets and antigen-presenting accessory cells, differential effect of isoflurane on, *In Vitro* [Grun, Maurer, Torjman, Schieren, Maurer], A1000
- plasma**
- fresh frozen, administration of, to patients with end-stage liver disease, ionized calcium levels during [Washington, Prager, Kelley, White, Cauldwell], A277
- platelets**
- aggregation, predilution and titrated inhibition of: principle for hemofiltration in immediate postoperative period [Hodl, Chiari, Muller, Legat, Zimpfer], A436
- aggregometry, comparison of thromboelastography and [Tuman, McCarthy, Patel, Patel, Ivankovich], A433
- autologous platelet-rich-plasma, comparison of ACT and TEG in patients receiving, during cardiac surgery [Wong, Jones, Wade], A434
- function, evaluation of, during autologous blood donation [Harris, Rinder, Bonan, Hines], A1121
- function of, following surgery involving blood loss [Gibbs, Crawford, Michalopoulos], A71
- interaction of, with coronary circulation, effect of halothane on [Gobeil, Blaise, Tanguay], A519

- platelet-leukocyte binding on cardiopulmonary bypass [Rinder, Mathew, Bonan, Smith], A58
- platelet-rich plasmapheresis during cardiac reoperations [Reich, Koorn, Vitale, DePerio, Silway], A987
- release of 5-hydroxytryptamine and thromboxane A<sub>2</sub> from, inhibited by halothane and isoflurane, in humans [Blaise, Buluran], A520
- protamine**
- calculating protamine heparin reversal ratio [Murray, Hampton, Hargovan, Wright], A62
  - effects of, on ACT and antithrombin III-heparin complex during cardiac surgery [Inada, Aoki, Kohama, Aoki, Takanashi, Iwahashi, Furuta], A78
  - effects of, on vascular smooth muscles of human mesenteric artery [Akata, Kodama, Matsuyama, Takahashi, Yoshitake], A75
  - skin tests correlation with antibodies to protamine [Horrow, Levit, Freeland, Began, Henry], A61
- stored**
- evaluation of platelet function during autologous blood donation [Harris, Rinder, Bonan, Hines], A1121
- volume**
- intraoperative hypovolemia, hypertonic saline dextran resuscitation of, less net volume loading with [Anaya, Drace, Myers, Kramer], A1122
  - regional, effects of vasopressin on, in supine humans [Hopf, Klement, Stuhmeier, Wust, Peters], A160
  - Blood flow. *See also under* Brain; Kidney; Liver; Lung; Measurement techniques;
  - Skin vital organ, during deliberate hypotension [Kick, van Aken, Wouters, Verbesselt, an Hemelrijck], A625
- Blood flow, myocardial.** *See under* Heart
- Blood pressure.** *See also under* Measurement techniques; Monitoring
- hemodynamic instability, are there any rules used for definition of?: medical decision making [East, Henderson, Pace, Morris, Brunner], A1059
- hypertension**
- effect of succinylcholine, hypercapnia and, in experimental osteofascial compartment syndrome [Varlotta, DiPasquale], A816
  - post CABG, left ventricular systolic and diastolic function during treatment of [Davies, Karski, Teasdale, Ivanov, Young, Weisel], A145
  - preoperative, prognostic importance of [Helman, Browner, Li, Mangano, SPI Research Group], A110
- measurement**
- comparison of arterial tonometry with radial artery catheter in, in anesthetized patients [Siegel, Brodsky, Bhatia, Brock-Utne], A424
  - physiologically-based oscillometric method [Sun, Clark], A425
  - preoperative, a poor indicator of diurnal variation [Fleisher, Rosenbaum, Barash], A103
- monitoring**
- noninvasive superficial temporal artery blood pressure, [Baker, Westenskow], A460
  - propofol-induced arterial compliance increase accounts for systolic arterial pressure decrease [Dupuy, Schurando, Payen], A144
- Body temperature.** *See under* Temperature
- Brachial plexus anesthesia.** *See under* Anesthetic techniques, regional
- Bradykinin.** *See under* Pharmacology
- Brain**
- actual temperature of, during deep hypothermia, recorded at standard monitoring sites [Stone, Young, Smith, Solomon, Ostapovich, Wang], A483
  - anoxia**
    - chemical, in neuronal cell line, elevated cytosolic Ca<sup>2+</sup> does not mediate cell death from [Johnson, Uhl, Gores, Sill], A612
    - effect of brain reperfusion strategy on cerebral blood flow and metabolism after total circulatory arrest in children [Greeley, Mault, Baldwin, Stockwell, Reves, Ungerleider], A966
  - blood flow**
    - during adenosine-induced hypotension in human [Lam], A173
    - alteration by halothane and isoflurane of reactivity to PGF<sub>2a</sub> in human cerebral arteries [Reinstrup, Uski, Messeter], A200
    - attenuating canine cerebral artery contractions, halothane exhibits agonist specificity in [Martin, Sill, Nelson], A541
    - canine cerebral arteries, effect of halothane and isoflurane on, *In Vitro* [Brian, Kennedy], A615
    - cerebral, changes in EEG and cerebral blood flow velocity and, with repeated propofol infusions in dogs [Kochs, Cunningham, Hoffman, Werner, Albrecht, Schulte am Esch], A617
    - cerebral microvascular effects of fentanyl, sufentanil, and alfentanil in piglets [Monitto, Kurth], A542
    - cerebral perfusion absent during extremes of low-flow cardiopulmonary bypass [Burrows, Bissonnette], A947
    - cerebral perfusion mapping with ultrasound contrast [Rampil], A1006
    - cerebral vasodilator, nitrous oxide as? [Lu, Gibson, Monell, Frost, Goldiner], A539
    - cerebral vasoreactivity, increased by estrogen withdrawal [Shay, Futo, Block, Badrov, Thisted, Moss], A540
    - changes in, during isoflurane anesthesia, monitored by transcranial Doppler sonography [Werner, Hoffman, Kochs, Schulte am Esch, Albrecht], A616
    - comparative effects of desflurane and isoflurane on [Ornstein, Young, Ostapovich, Prohovnik, Stein], A209
    - distribution, effects of sevoflurane and isoflurane on, in rats [Habazettl, Conzen, Vollmar, Peter, Messmer], A549
    - effect of brain reperfusion strategy on, after total circulatory arrest in children [Greeley, Mault, Baldwin, Stockwell, Reves, Ungerleider], A966
    - effect of dexmedetomidine on cerebrovascular response to hypoxia during isoflurane anesthesia [McPherson, Traystman], A174
    - effect of fentanyl and sufentanil on, in rabbits with acute cryogenic brain injury [Sheehan, Scheller, Zornow, Peterson], A618
    - effect of methylparaben and propylparaben on [Gignac, Gelb, Manninen, Farrar, Lee], A196
    - effect of PaCO<sub>2</sub> on, during halothane *versus* isoflurane anesthesia, in rat [Young, Barkai, Prohovnik, Nelson, Durkin], A170
    - effect of succinylcholine on, in patients with neurologic disorders [Kovarik, Lam, Slee, Mathisen], A207
    - endothelium-dependent vascular relaxation, regional changes in, in diabetic rat [Pelligrino, Albrecht], A547
    - human CBF-CO<sub>2</sub>: responsiveness maintained during propofol-nitrous oxide anesthesia [Fox, Gelb, Manninen, Farrar], A169
    - hypercapnic reactivity, blunted by hypoglycemia in piglets [Jacques, Kirsch, Traystman], A545
    - hypocapnia-induced contraction of isolated dog cerebral artery more susceptible to halothane than pentobarbital [Hatano, Nakamura, Toda, Nishiwada, Mori], A548
    - impaired by rewarming injury, after hypothermic CPB [Johnston, Vinten-Johansen, DeWitt, Stump, Prough], A543
    - influence of pH-management of mean blood flow velocity in middle cerebral artery during hypothermia cardiopulmonary bypass [Vannelli, Murkin, Lee], A56

- middle cerebral artery blood flow velocity, carbon dioxide affect on, during general anesthesia [Pashayan, Mahla, Richards], A172
- modulation by CO<sub>2</sub> and pH of reactivity to PGF<sub>2a</sub> in human cerebral arteries [Reinstrup, Uski, Messeter], A199
- nitrous oxide is more potent cerebrovasodilator than isoflurane in humans [Lam, Slee, Cooper, Bachenbert, Mathisen], A168
- not improved by hypertonic saline, after experimental head injury and hemorrhage in cats [Prough, DeWitt, Taylor, Deal, Vines], A544
- preserved coupling of CNS metabolism and, during halothane anesthesia [Szabo, Crosby], A614
- response to alfentanil in humans [Slee, Lam, Winn, Laohaprasit], A171
- role of adenosine in, increases during hypoglycemia *versus* hypoxia in rat [Pelligrino, Albrecht, Hoffman], A546
- vasopressin dilates cerebral arteries in fetal sheep [Tong, Eisenach], A819
- velocity of, is coupled to EEG activity during hypothermic cardiopulmonary bypass [Walker, Isley, Lucas, Kafer], A177
- carbon dioxide tension**
- effect of PaCO<sub>2</sub> on cerebral blood flow distribution during halothane *versus* isoflurane anesthesia, in rat [Young, Barkai, Prohovnik, Nelson, Durkin], A170
- human CBF-CO<sub>2</sub>: responsiveness maintained during propofol-nitrous oxide anesthesia [Fox, Gelb, Manninen, Farrar], A169
- indomethacin reduction of, in patients with cerebral disorders [Taeishi, Sadamitsu, Soejima, Maekawa, Sanuki, Matsumoto, Nakashima], A188
- middle cerebral artery blood flow velocity during general anesthesia [Pashayan, Mahla, Richards], A172
- modulation by CO<sub>2</sub> and pH of reactivity to PGF<sub>2a</sub> in human cerebral arteries [Reinstrup, Uski, Messeter], A199
- C-fos and jun-B messenger RNA, differential effects of pentobarbital and halothane on [Marota, Crosby, Uhl], A647
- death, effect of, on organ blood flow [Ali, Gelb], A210
- diethyl ether enhances GABA-gated chloride flux by allosteric mechanism [Quinlan, Firestone], A1034
- efficient cooling of, conventional monitoring is poor correlate of [Kern, Jonas, Mayer, Hanley, Castenada, Hickey], A57
- electroencephalography**
- accuracy of, in predicting movement at incision during isoflurane anesthesia [Sebel, Bowles, Saini, Chamoun], A446
- bispectral analysis of, may predict anesthetic depth during narcotic induction [Kearse, Saini, deBros, Chamoun], A175
- cerebral blood flow velocity is coupled to, during hypothermic cardiopulmonary bypass [Walker, Isley, Lucas, Kafer], A177
- changes in cerebral blood flow and cerebral blood flow velocity and, with repeated propofol infusions in dogs [Kochs, Cunningham, Hoffman, Werner, Albrecht, Schulte am Esch], A617
- characteristics of emergence from propofol/sufentanil total intravenous anesthesia [Traast, Kalkman], A184
- coherence analysis of, during isoflurane anesthesia [Levy, Canals-Curtis], A178
- correlated multiple-wavelength monitoring of localized cerebrocortical NADH and brain microvessel hemoglobin O<sub>2</sub> saturation [Rampil, Litt, Mayevsky], A447
- does not predict movement in response to surgical incision at 1.0 MAC isoflurane [Dwyer, Rampil, Eger, Bennett], A1025
- effect of succinylcholine on, in patients with neurologic disorders [Kovarik, Lam, Slee, Mathisen], A207
- effects of propofol compared to methohexital [Reddy, Moorthy, Matice, Dierdorf, Dietsch], A182
- epileptiform activity, not caused by propofol [Mahla, Grundy, Schmidt, Richards, Mixson], A183
- epileptiform activity of narcotic anesthesia during carotid endarterectomy, prevalence of [Kearse, McPeck], A1029
- four channel density spectral array does not reliably detect mild cerebral ischemia during carotid endarterectomy [Kearse, Martin, McPeck], A1028
- isoflurane at depths producing burst-suppression pattern in, hemodynamic response to intubation not attenuated by [Spackman, Messick, Sharbrough], A355
- pancuronium potentiates EEG effect of isoflurane in dogs [Schwartz, Navedo, Berman], A792
- power spectrum changes during propofol sedation [Veselis, Reinsel, Marino, Wronski], A181
- prediction, of arousal during anesthesia with combinations of isoflurane, fentanyl, and N<sub>2</sub>O [Dutton, Smith, Smith], A448
- regional, response to induction of high-dose fentanyl anesthesia evaluated by new brain function monitoring system [Ochiai, Koitabashi, Toyoda, Fukushima], A445
- spectral activity: objective index of postoperative pain in infants [Meyer, Jayais, Bensouda, Mayer, Barrier], A1026
- etomidate modulation of central GABAA-receptor gated current [Yang], A578
- evoked potentials**
- auditory, to pitch change during sufentanil anesthesia [Plourde, Joffe], A449
- cortical magnetic motor, effect of enflurane, halothane, isoflurane and nitrous oxide on [Sloan, Levin], A450
- monitoring, automated flash visual, intracranial pressure compared with [Hyman, Xu, King, Smith], A205
- motor, by transcranial magnetic stimulation, effect of neuroleptanalgesia on, in primates [Ghaly, Stone, Kartha, Asokan, Alexander], A595
- motor and somatosensory, comparative analysis of enflurane dose-effect on, in primate [Ghaly, Kartha, Stone, Krinsky, Asokan, Alexander], A613
- motor evoked responses to transcranial electrical or magnetic stimulation, effects of propofol, etomidate, midazolam, and fentanyl on, in humans [Kalkman, Drummond, Ribberink, Patel, Sano, Bickfor], A1024
- neurogenic motor, are predictive of neurologic function in porcine model of aortic occlusion [Mongan, Peterson], A1123
- neurogenic motor, effect of intravenous anesthetics on, recorded at spinal and sciatic level [Peterson, Mongan], A179
- spinal and cortical, for innocuous and noxious electrical stimuli, component-specific and naloxone reversible effects of fentanyl on, in rabbit [Lee], A652
- transcranial magnetic motor evoked potentials, effect of anesthetic agents on, in neurosurgical patients [Losasso, Boudreaux, Muzzi, Cucchiara, Daube], A1032
- GABA-gated chloride flux enhanced by halothane, in mice selectively bred for sensitivity to diazepam [Quinlan, Winter, Gallaher, Firestone], A582
- general anesthetic effects on protein kinase C activity are substrate-dependent [Firestone, Gray, Firestone], A1042
- hippocampus**
- cultured rat hippocampal neurons, three volatile anesthetics enhance GABA-activated chloride currents in, at clinically relevant concentrations [Harrison, Jones, Brooks], A1040
- GABA-mediated inhibitory postsynaptic currents at synapses between cultured rat hippocampal neurons prolonged by clinical concentration of three volatile anesthetics [Jones, Hornberger, Harrison], A580



- methohexital and volatile anesthetics reduce depolarization-induced calcium entry into cultured rat hippocampal neurons [Bleakman, Jones, Roback, Hornberger, Radke, Miller, Harrison], A583
- propofol improves electrophysiological recovery after anoxia in, in rat [Rosenberg, Kass, Cottrell], A606
- sodium levels in, thiopental and tetrodotoxin have similar effects on, in rat [Abramowicz, Kass, Cottrell], A607
- hypoxia**
- comparison of cerebral protective effects of isoflurane and mild hypothermia in model of incomplete forebrain ischemia [Sano, Patel, Drummond, Grafe, Cole], A602
- focal cerebral ischemia, effects of MK-801 on cerebral regional oxygen consumption in [Chi, Anwar, Sinha, Weiss], A609
- four channel density spectral array does not reliably detect mild cerebral ischemia during carotid endarterectomy [Kearse, Martin, McPeck], A1028
- incomplete cerebral ischemia, dexmedetomidine improves outcome from, in rat [Hoffman, Kochs, Werner, Albrecht], A608
- inhalational anesthetics decrease central catecholamine activity and improve ischemia outcome [Hannigan, Lingamneni, Miletich, Albrecht], A604
- ischemic-hypoxia injury in cultured neurons and astrocytes measured by dye technique [Juurlink, Sochocka, Hertz, Shuaib, Cole], A610
- ischemic-hypoxia injury in cultured neurons and astrocytes measured by LDH release [Sochocka, Shuaib, Code, Hertz], A642
- during isoflurane anesthesia, effect of dexmedetomidine on cerebrovascular response to [McPherson, Traystman], A174
- ketamine improves outcome from incomplete cerebral ischemia, in rats [Hoffman, Pelligrino, Albrecht], A605
- oxygen-glucose deprivation, extracellular alkalosis exacerbates injury of cortical neurons due to [Giffard, Choi], A611
- propofol improves electrophysiological recovery after anoxia in rat hippocampal slice [Rosenberg, Kass, Cottrell], A606
- sevoflurane reduces neurologic deficit following incomplete ischemia in rats [Werner, Kochs, Hoffman, Mollenberg, Schulte am Esch], A603
- intracranial pressure**
- automated flash visual evoked potential monitoring compared with [Hyman, Xu, King, Smith], A205
- brain water, brain relaxation and, comparison of mannitol and furosemide [Schubert, Awad, Perez-Trepichio, Ebrahim, Bloomfield], A202
- comparison of sodium nitroprusside and labetalol in, in cats [Thiagarajah, Lear, Azar, Talavera], A619
- correlation between electrocardiographic changes and intracranial blood following subarachnoid hemorrhage [Arya, Mannien, Gelb, Pelz], A176
- effect of fentanyl and sufentanil on, in rabbits with acute cryogenic brain injury [Sheehan, Scheller, Zornow, Peterson], A618
- effect of succinylcholine on, in patients with neurologic disorders [Kovarik, Lam, Slee, Mathisen], A207
- elevated, during routine endotracheal suction, effects of atracurium on [Klezl, Werba, Illievich, Schramm, Spiss], A211
- hypertonic, hyperoncotic hydroxyethyl starch decrease in, following neuro trauma [Weinstabl, Mayer, Germann, Steltzer, Hammerle], A201
- indomethacin reduces carbon dioxide-induced elevation of, in patients with cerebral disorders [Taeishi, Sadamitsu, Soejima, Maekawa, Sanuki, Matsumoto, Nakashima], A188
- neurological status and brain edema unaffected by high quantity glucose and fluid administration, following closed cranial injury in rats [Shapira, Artru, Cotev, Muggia-Sulam, Freund], A204
- not reduced by hypertonic saline, after experimental head injury and hemorrhage in cats [Prough, DeWitt, Taylor, Deal, Vines], A544
- protective effect of ketamine following closed cranial impact in rats [Shapira, Artru, Lam], A203
- significant increase in, with sufentanil and fentanyl, in resuscitated head trauma patients [Bailey, Sperry, Reichman, Peterson, Petersen, Pace, Stanley], A198
- ischemia**
- forebrain, regional recovery of eicosanoids after, by microdialysis, in rats [Patel, Drummond, Mitchell, Yaksh, Cole], A628
- locus ceruleus, mediating role of  $\alpha 2$  adrenoceptors in, for hypnotic response to dexmedetomidine, in rats [Correa-Sales, Rabin, Maze], A635
- metabolism**
- brain dead patients, oxygen delivery and consumption in [Mateo, Langeron, Pansard, Arthaud, Cohen, Viars], A259
- comparison of cerebral protective effects of isoflurane and mild hypothermia in model of incomplete forebrain ischemia [Sano, Patel, Drummond, Grafe, Cole], A602
- correlated multiple-wavelength monitoring of localized cerebrocortical NADH and brain microvessel hemoglobin O<sub>2</sub> saturation [Rampil, Litt, Mayevsky], A447
- effect of brain reperfusion strategy on, after total circulatory arrest in children [Greeley, Mault, Baldwin, Stockwell, Reves, Ungerleider], A966
- ischemic-hypoxia injury in cultured neurons and astrocytes measured by LDH release [Sochocka, Shuaib, Code, Hertz], A642
- preserved coupling of CNS blood flow and, during halothane anesthesia [Szabo, Crosby], A614
- response to alfentanil in humans [Slee, Lam, Winn, Laohaprasit], A171
- synaptosomal membranes, saturable binding of halothane to, in rat [El-Maghrabi, Echenhoff, Shuman], A373
- synaptosomes, enhancement of enzymatic phospholipid N-methylation during anesthesia with isoflurane, in rat [Franks, Sastry, Surber, England], A338
- middle cerebral artery, estimation of embolic air volume in, using transcranial sonography [Bunegin, Wahl, Albin], A471
- oxygen consumption**
- in focal cerebral ischemia, effects of MK-801 on [Chi, Anwar, Sinha, Weiss], A609
- oxygenation**
- correlated multiple-wavelength monitoring of localized cerebrocortical NADH and brain microvessel hemoglobin O<sub>2</sub> saturation [Rampil, Litt, Mayevsky], A447
- noninvasive measurement of, with near-infrared spectroscopy, influence of tissue layers on [Snyder, Williams, Brem, Eleff, Norris, Hanley], A208
- potassium homeostasis preserved by isoflurane, during induced hypotension and hypocapnia, in rats [Waaben, Kaiser, Rossen, Lundbaek, Husum, Hansen], A620
- response of human CNS sodium channels to midazolam [Frenkel, Urban], A646
- synapses**
- intercellular communications between astrocytes differentially affected by general anesthetics [Mantz, Cordier, Desmots, Giaume], A581
- Bretylium.** *See under Sympathetic nervous system, pharmacology*
- Brifentanyl.** *See under Analgesics*
- Bronchus.** *See under Lung*
- Bupivacaine.** *See under Anesthetics, local*
- Buprenorphine.** *See under Analgesics*

Burns. *See under* Complications

Butamben. *See under* Anesthetics, local

## C

Calcitonin. *See under* Pharmacology

Calcium. *See under* Ions

Cannulation. *See under* Arteries; Veins, jugular

Capsaicin. *See under* Pharmacology

Carbon dioxide. *See also under* Monitoring

effect of changes in, on matching of ventilation and perfusion in normal lungs [Domino, Eisenstein, Lu, Swenson, Hlastala], A128

**hypercarbia**

coronary small artery constriction and simultaneous arteriolar dilation during [Habazettl, Conzen, Vollmar, Adili, Muller, Peter], A526

effect of succinylcholine, hypertension and, in experimental osteofascial compartment syndrome [Varlotta, DiPasquale], A816

hypercapnic cerebral blood flow reactivity blunted by hypoglycemia in piglets [Jacques, Kirsch, Traystman], A545

increases  $\dot{V}_A/Q$  heterogeneity in canine oleic acid lung injury [Domino, Eisenstein, Lu, Hlastala], A235

respiratory sensitivity to, after brifentanyl [Cigada, Afifi, Glass, Esposito, Camporesi], A1097

succinylcholine increases  $PETCO_2$  in dose dependent manner [van der Spek], A300

**hypocarbica**

contraction of isolated dog cerebral artery induced by, more susceptible to halothane than pentobarbital [Hatano, Nakamura, Toda, Nishiwada, Mori], A548

effect of hyperventilation on tympanic membrane temperature as measured by infrared scanning [Romanelli, Hiestand, Howie, Wert], A482

hyperventilation reduces skin blood flow and transcutaneous oxygen in extremities [Barker, Hyatt, Clarke], A409

increases  $\dot{V}_A/Q$  heterogeneity in canine oleic acid lung injury [Domino, Eisenstein, Lu, Hlastala], A235

induced, isoflurane preserves brain potassium homeostasis during, in rats [Waaben, Kaiser, Rossen, Lundbaek, Husum, Hansen], A620

influence of moderate hypocapnia on pulmonary vascular tone following mitral valve replacement [Mahdi, Salem, Joseph, Paulissiani, Hernandez], A166

**measurement**

relationship between end-tidal and arterial carbon dioxide in neurointensive care patients [Russell, Graybeal], A197

**monitoring**

colorimetric end-tidal carbon dioxide detector in children, validation of [Kelly, Wilhoit, Brown, Case], A946

continuous and accurate end-tidal  $CO_2$  and anesthetic concentration measurements at [Perkins, Marsh], A486

new endotracheal tube connector for sampling end-tidal  $CO_2$  in infants [Halpern, Bissonnette], A930

pulse oximetric and capnographic, reliability of, during laparoscopic surgery for cholecystectomy [Nyarwaya, Samii, Mazoit, De Watteville], A453

in recovery room after general anesthesia [Melnyk, Cohen, Kan, Perpich], A902

transcutaneous  $CO_2$  monitoring, at 42°C probe temperature shows good correlation with arterial  $PcO_2$ , in SICU patients [Weir, Wong, Tremper, Zaccari, Daves, Patel], A493

**tension**

veno-arterial gradients for  $PCO_2$  and  $pH$  reflect tissue hypoxia during hemorrhagic shock in dogs [Vanderlinden, Gilbert, Paques, Bakker, Vincent], A236

**ventilatory response**

$CO_2$  response curve displacement, read rebreathing technique may not accurately reflect drug-induced changes in [Gross, Weller, Conard, Smith], A1094

$CO_2$  responses of inspiratory and expiratory bulbospinal neurons and phrenic nerve activity, dose-dependent effects of halothane on, in dogs [Stuth, Tonkovic-Capin, Zuperku, Kampine], A1096

effects of  $CO_2$  insufflation during laparoscopic cholecystectomy [Joris, Ledoux, Honore, Lamy], A121

during ventilatory failure due to Guillain-Barre and myasthenia gravis [Borel, Teitelbaum, Nichols, Hanley, Traystman], A254

Carbon dioxide tension. *See under* Brain

Carbon monoxide. *See under* Gases, nonanesthetic

Cardiac massage. *See under* Heart

Cardiac output. *See under* Measurement techniques

Cardiovascular anesthesia. *See under* Anesthesia

Cardiovascular surgery. *See under* Surgery

Carotid endarterectomy. *See under* Surgery

Catheters. *See under* Equipment

Caudal anesthesia. *See under* Anesthetic techniques, epidural

Celiac plexus. *See under* Sympathetic nervous system

**Cells**

**metabolism**

calcium channel antagonist action, vasodilation by, produced by propofol [Chang, Lacy, Davis], A553

cytosolic  $Ca^{2+}$  increase and contraction in vascular smooth muscle of rat aorta, inhibitory effect of halothane and isoflurane on [Tsuchida, Notsuki, Yamakage, Fujita, Namiki], A531

direct arteriolar and venular dilating effects of various vasoactive agents [Chen, Chang, Guth], A564

EDRF or other cyclic GMP mediated mechanisms, isoflurane does not vasodilate rat thoracic aortic rings by [Brendel, Proctor, Johns], A534

EDRF synthase activity, mechanism of inhibition of, by high and low oxygen tensions [Johns, Rengasamy], A538

endothelial cell calcium mobilization altered by volatile anesthetics [Loeb, O'Brien, Longnecker], A533

endothelial cells,  $Ca^{2+}$  exchange in, differential effects of halothane and isoflurane on [Shayevitz, Williams, Varani], A1001

endothelium-dependent circulatory control *In Vivo*, influences of halothane and isoflurane on [Greenblatt, Loeb, Longnecker], A532

etomidate produces vasodilation by mixed endothelium-dependent and independent mechanisms [Dozaki, Chang, Davis], A537

halothane may suppress action of G-protein, Gp, in endothelial cells [Robinson-White, Kobayashi], A995

interaction between nitric oxide and norepinephrine vasoconstriction in anesthetized rabbits [Lossner, Lenfant, Pastor, Teisseire, Payen], A562

intracellular antioxidant defenses and redox state, halothane-mediated changes in [Yousif, Shayevitz, Varani], A999

isoflurane and halothane inhibit vascular cell signalling independent of G-proteins [Sill, Uhl, Eskuri], A528

isoflurane inhibits endothelium-dependent relaxation and cyclic GMP formation in rat aorta [Nakamura, Hatano, Toda, Mori], A530

isoflurane inhibits signal transduction in cultured vascular smooth muscle cells [Eskuri, Sill, Van Dyke, Uhl], A529

Cepharpirin. *See under* Pharmacology

Cerebrospinal fluid

**composition**

elevated endothelin-1 level in, of patients with subarachnoid hemorrhage [Shirakami, Magaribuchi, Saito, Nakao, Mori], A191

**pressure**

effect of desflurane and isoflurane with N<sub>2</sub>O on, in patients with supratentorial mass lesions [Muzzi, Daltner, Losasso, Weglinski, Milde], A167

**Chloroprocaine.** *See under Anesthetics, local*

**Cholinesterase.** *See under Enzymes*

**Chronic pain.** *See under Pain*

**Clonidine.** *See under Sympathetic nervous system, alpha-adrenergic agonists*

**Coagulation.** *See under Blood*

**Cocaine.** *See under Anesthetics, local*

**Community education.** *See under Education*

**Complications.** *See also under Intubation, tracheal; Transfusion; Veins, jugular*

acute exacerbation of carpal tunnel syndrome following radial artery cannulation [Martin, Mineo, Sharrock, Sobel], A473

anesthetic critical incidents analyzed using cognitive science techniques [Cook, Woods, McDonald], A865

anesthetic morbidity in congenital heart disease patients undergoing non-cardiac surgery [Strafford, Henderson], A1056

anesthetic morbidity in congenital heart disease patients undergoing outpatient surgery [Strafford, Henderson], A866

angle of incidence of 9.0-French, high-volume infusion introducer sheaths and relative perforating potential [Carter, Blackshear, Gravenstein], A1008

**aspiration**

cricoid pressure in infants revisited [Moynihan, Brock-Utne], A932

is coloscopic preparation with oral polyethyleneglycol 2 hours before general anesthesia safe in ambulatory patients? [Mahiou, Narchi, Gory, Veyrac, Germond, Bazin], A1108

prophylaxis, oral famotidine for, in surgical outpatients [Solanki, Talke], A908

ranitidine and water increase gastric pH and decrease gastric residual volume in outpatients [Ross, Momany], A1110

autologous blood transfusion may induce secondary neuromuscular blockade in postoperative patients [Montefiore, Boico, Deghani, Bonnet, Zetlaoui], A795

**burns**

endotoxemia: reperfusion injury to airway? [Abdi, Traber, Herndon, Traber], A225

muscles under thermally-injured skin, resistance to atracurium in, in rat [Pavlin, Howard, Slattery], A779

severe, evaluation of gastric emptying in [Ho, Wang, Ho, Hu, Lin], A293

cauda equina syndrome, following continuous spinal anesthesia, explanation for: spinal model study of local anesthetic distribution [Rigler, Drasner], A703

**convulsions**

seizures following postdural puncture headache in postpartum women: series with suggested etiology [Shearer, Cunningham, Wallace, Giesecke], A852

**diabetes**

glycemic control and severity of surgery in [Raucoules, Lugin, Ichai, Deloffre, Grimaud], A282

**embolism**

aeric microemboli and transcranial Doppler: episodic frequency and timing in open heart surgery [Albin, Hantler, Mitzel, Bunegin, Grover], A53

assessment of microembolization during cardiopulmonary bypass by transesophageal echocardiography [Calalang, Shapiro, Schwartz, Queeno, Shah, Hick, Meltzer], A64

in total hip arthroplasty, cemented *versus* noncemented [Weber, Ereth, Abel], A390

eye injury associated with anesthesia: closed claims analysis [Gild, Posner, Caplan, Cheney], A864

gastroesophageal injury, transesophageal echocardiography and [Hulyalkar, Ayd, Casella], A387

**headache**

post-dural puncture, theophylline for [Schwalbe, Schiffmiller, Marx], A1082

postdural puncture headache, incidence of, in obstetrical patients: comparing 24-gauge and 22-gauge Sprotte needles [Leeman, Sears, O'Donnell, Reisner, Jassy, Harmon, O'Donnell, Kelleher, Stanos], A853

postdural puncture headache, seizures following, in postpartum women: series with suggested etiology [Shearer, Cunningham, Wallace, Giesecke], A852

post-spinal headache after cesarean section, not reduced by spinal catheter [Blaise, Cournoyer, Perrault, Bedard, Petit, Landry], A857

**hematoma**

elevated endothelin-1 level in cerebrospinal fluid of patients with subarachnoid hemorrhage [Shirakami, Magaribuchi, Saito, Nakao, Mori], A191

**hypertension**

fenoldopam in management of, evaluation of [Goldberg, Cantillo, Munoz, Nemiroff, Subramoni, Torjman, Vekeman, Davis], A49

postoperative hyperdynamic cardiovascular response following intracranial excision of arterial venous malformation [Poremka, Ebrahim, Bloomfield, Stuebing], A215

tourniquet, blocked by angiotensin-converting enzyme inhibition? [Heropoulos, Schieren, Seltzer, Bartkowski, Torjman, Lessin, Moody], A158

interscalene block [Urban, McDonald, Urquhart, Sharrock], A733

**lung**

endotoxemia: reperfusion injury to airway? [Abdi, Traber, Herndon, Traber], A225

**morbidity**

anesthetic, associated with pharyngoplasty in children: five year review [Halpern, Roy], A933

Apache II disease category assignment: correlation with autopsy diagnosis [Gettinger, Wells, Rawnsley], A272

Apache II disease category assignment: variability and predicted mortality [Gettinger, Wells, Rawnsley], A273

ASA physical status and age predict morbidity following three surgical procedures [Cullen, Cleary, Guadagnoli, Chittenden], A872

perioperative mortality following total knee and hip arthroplasty—role of anesthesia care? [Sharrock], A868

mortality and morbidity of regional *versus* general anesthesia: meta-analysis [Sorensen, Pace], A1053

**myasthenia gravis**

ventilatory drive and CO<sub>2</sub> response during ventilatory failure due to [Borel, Teitelbaum, Nichols, Hanley, Traystman], A254

**myocardial infarction**

incidence of, in patients with prior percutaneous transluminal coronary angioplasty [Gottlieb], A52

albuphine ameliorates pruritus caused by continuous epidural bupivacaine-fentanyl in postoperative patients [Newman, Dragisic, Lubenow, McCarthy, Ivankovich], A770

postoperative, not reduced by pulse oximetry: prospective study of 20,802 patients [Moller, Pedersen, Johannessen, Rasmussen, Espersen, Dyrland, Jensen, Rasmussen, Ravlo, Chraemmer-Jorgensen, Djernes, Wiberg-Jorgensen, Cooper, Gravenstein, Johansen], A867

postoperative, when do they occur? prospective study of 20,802 patients [Johannessen, Jensen, Moller], A863

- radiation**  
 exposure of anesthesiologists [Henderson, Lu, Rockoff, Strauss, Treves], A896  
 respiratory, risk factors for, after cardiac surgery [Higgins, Yared, Paranandi, Baldyga, Starr], A258  
 serum CK and CK-MB levels in cesarean section patients [Ross, Conrad, Mitruka, Baker], A862
- shivering**  
 comparative effects of clonidine and ketanserin on [Banache, Joris, Lamy], A51  
 during C-section, effect of epidural butorphanol and fentanyl on [Chen, Kwan], A843
- thrombosis**  
 deep venous prophylaxis by low molecular weight heparin [Melon, Keravel, Gaston, Huet, Combes, Neuronox Group], A214  
 risk of indwelling venous catheter in femoral position [Durbec, Albanese, Rouzaud, Granthil], A267  
 thrombotic risk of long-term radial artery cannulation, two different cannulae [Auffray, Martin, Lambert, Saux, Gouin], A892
- trauma**  
 rapid availability of blood for massive transfusion in trauma center: new approach using blood blocks [Coveler, Werch, Todd], A109  
*In Vitro* assessment of amniotic fluid removal from human blood through cell saver processing [Thornhill, O'Leary, Lussos, Rutherford, Johnson], A830
- Computerized tomography.** *See under* Measurement techniques
- Computers.** *See also under* Equipment  
 artificial neural-networks systems, respiratory waveforms recognition with [Leon, Lorini], A492  
 automated computer-assisted anesthesia interview for outpatient anesthesia [Stead, Trentalange], A489  
 computer-aided assessment of refractoriness of neuromuscular transmission [Lee, Tsai, Lin], A805  
 computerized preanesthetic evaluation system, disease descriptors for [Jackson, Gibby, Gravenstein, Paulus], A495  
 demand controlled infusion of vecuronium [Gilly, Andel, Lackner, Sauberer, Foldes], A1009  
 IVA-SIM interactive program, to simulate intravenous anesthesia [Schuttler, Kloos], A329  
 manual *versus* automatic control in induction and maintenance of deliberate hypotension [Scanlon, Martin, Smith], A462  
 non-linear closed-loop controller for oxygenation based on clinically proven fifth dimensional quality surface [East, Tolle, McJames, Farrell, Brunner], A468  
 propofol infusion controlled by: comparison of three pharmacokinetic models [Viviand, Guidon-Attali, Lacarelle, Borsarelli, Francois], A313  
 versatile closed-loop system controlled by, for continuous infusion of muscle relaxants [Assef, Jones, Lennon, Burke, Behrens], A467
- Congenital defects.** *See under* Heart
- Continuing education.** *See under* Education
- Continuous positive pressure.** *See under* Ventilation
- Contractility.** *See under* Heart; Muscle, skeletal
- Convulsions.** *See under* Complications
- Cooling.** *See under* Temperature
- Coronary occlusion.** *See under* Heart
- Corticosteroid hormones.** *See under* Hormones
- CP96345.** *See under* Pharmacology
- Cyclosporine.** *See under* Pharmacology

## D

- Desflurane.** *See under* Anesthetics, volatile
- Desmopressin.** *See under* Pharmacology
- Dexmedetomidine.** *See under* Sympathetic nervous system, alpha-adrenergic agonists
- Diabetes.** *See under* Complications; Metabolism
- Diaphragm.** *See under* Muscle, skeletal
- Diazepam.** *See under* Anesthetics, intravenous; Hypnotics
- Diethyl ether.** *See under* Anesthetics, volatile
- Dobutamine.** *See under* Pharmacology
- Dopamine.** *See under* Pharmacology; Sympathetic nervous system, pharmacology
- Doppler ultrasound.** *See under* Measurement techniques
- Dorsal horn ganglia.** *See under* Spinal cord
- Doxacurium.** *See under* Neuromuscular relaxants
- Dystrophy.** *See under* Sympathetic nervous system

## E

- Echocardiography.** *See under* Heart
- Edema.** *See under* Lung
- Edrophonium.** *See under* Antagonists, neuromuscular relaxants
- Education**  
**community**  
 current anesthesia practice and training in retrobulbar nerve blocks [Lubenow, Deutsch, Narbone, Ivankovich], A885
- continuing**  
 in critical care medicine, fourth year elective in [Rogers, Grenvik], A227  
 fiberoptic endoscopy training workshop, evaluation of: phase I [Randel, McDermott, Ovassapian], A883
- residents**  
 are anesthesia residency programs still failing to teach regional anesthesia? [Kopacz], A759  
 candidates' perceptions: residency program interviews [Rosenberg, Polonsky, Horrow, Padolina], A877  
 in critical care medicine, fourth year elective in [Rogers, Grenvik], A227  
 current anesthesia practice and training in retrobulbar nerve blocks [Lubenow, Deutsch, Narbone, Ivankovich], A885  
 does conference attended by, affect their test scores? [Polk, Wirtes], A878  
 fiberoptic endoscopy training workshop, evaluation of: phase I [Randel, McDermott, Ovassapian], A883  
 monthly reading assignments and quizzes: impact on ABA in-training exam score improvement [Reinhart], A879  
 novice, task analysis, vigilance, and workload in [Gaba, Herndon, Zornow, Weinger, Dallen], A1060  
 relative importance of factors used to select residents: national survey [Frankville, Benumof], A876  
 substance abuse problems in anesthesiology residency training programs [Frasco, Leslie, Jones], A880
- Electrocardiography.** *See under* Heart; Monitoring
- Electroconvulsive therapy.** *See under* Anesthesia
- Electroencephalography.** *See under* Brain
- Embolism.** *See also under* Complications  
**air**  
 in middle cerebral artery, estimation of, using transcranial sonography [Bunegin, Wahl, Albin], A471  
 quantification of, neural network for [Fine, Orr, Westenskow, Kuck], A465
- Endobronchial anesthesia.** *See under* Anesthetic techniques
- Endorphins.** *See under* Polypeptides
- Endothelin.** *See under* Hormones
- Endotracheal tubes.** *See under* Equipment
- Enflurane.** *See under* Anesthetics, volatile
- Enkephalins.** *See under* Polypeptides

Enoximone. *See under* Pharmacology

**Enzymes**

**cholinesterase**

- human, protein binding of ORG 9426 and inhibitory effect on [Chaudhry, Foldes, Ohta, Nagashima], A786
- manganese superoxide dismutase, immunohistochemical localization of, in human lung [Noll, Coursin, Cihla], A281
- postoperative CPK levels in healthy pediatric patients [Kerker, Dhandha, Jewell], A950
- serum CK and CK-MB levels in cesarean section patients [Ross, Conrad, Mitruka, Baker], A862

Ephedrine. *See under* Sympathetic nervous system, pharmacology

Epidural anesthesia. *See under* Anesthetic techniques

Epinephrine. *See under* Heart; Pharmacology; Sympathetic nervous system

**Equipment**

**absorbers**

- incompetent unidirectional valves in, rebreathing due to [Podraza, Salem, Joseph, Brenchley], A422

**airway**

- pediatric, device selection with body length tape measure in [Hinkle, Arnold], A402

**ampules**

- glass, bacterial contamination of sterile solutions in [Zacher, Evans], A38

**anesthesia circuits**

- continuous breathing flow, measurement of oxygen consumption by indirect calorimetry during [Rasanen], A410
- incompetent unidirectional valves in, rebreathing due to [Podraza, Salem, Joseph, Brenchley], A422
- inhalation anesthetic delivery during patient transport, safety of [Friedhoff, Abenstein], A893
- Mapleson D, visualizing mixing of fresh gas and expired gas in: laboratory model [Halpern, Bissonnette], A421
- metal components stop laser fires [Sosis, Braverman, Ivankovich], A396
- method to deliver preset inspired concentration of anesthetic regardless of degree of rebreathing [Perhag, Larsson, Luttrupp, Persson, Werner], A1010
- neural network breathing circuit alarms in anesthesia workstation [Orr, Kuck, Farrell, Westenskow], A1005
- noninvasive respiratory monitor, *In Vitro* and *In Vivo* evaluation of [Cigada, Sebastianelli, Fordyce, Camporesi], A398
- read rebreathing technique may not accurately reflect drug-induced changes in CO<sub>2</sub> response curve displacement [Gross, Weller, Conard, Smith], A1094
- rebreathing, new, for controlled ventilation [In-nami, Okada, Koshimizu], A133
- spontaneous generation of carbon monoxide within [Moon, Ingram, Brunner, Meyer], A873

**anesthesia machines**

- contamination of [Brooks, Gupta, Baker], A874
- flush valve of, provision for effective jet ventilation by? [Gaughan, Benumof, Ozaki], A130
- prediction of performance in anesthesiology residency training, can personality profile be used in? [McDonald, Gough, Bradley, Lingam, Gupta], A875
- cardiac cycle specific thoracic vest inflation during autonomic blockade, coronary occlusion, and cardiac arrest, cardiovascular effects of, in dogs [Peters, Ihle], A1113

**catheters, arterial**

- venous arterial blood management system, clinical evaluation of [Peruzzi, Blake, Parker, Shapiro, Lichtenthal, Toht Davison], A474

**catheters, intravenous**

- indwelling, in femoral position, thrombotic risk of [Durbec, Albanese, Rouzaud, Granthil], A267
- venous arterial blood management system, clinical evaluation of [Peruzzi, Blake, Parker, Shapiro, Lichtenthal, Toht, Davison], A474
- venous oxygen saturation and [Auffray, Martin, Prima, Papazian, Gouin], A455

**catheters, peridural**

- contaminated epidural catheter injection site: can it be cleaned for continued use? [Turner, Feldman, Chapin], A834
- epidural catheter migration, prospective analysis of, in 1598 surgical cancer patients [deLeon-Casasola, Myers, Rempel, Bacon, Peppriell, Lema], A730
- tension applied to lumbar epidural catheters during removal is much greater with patient sitting *versus* lying [Blackshear, Gravenstein, Radson], A833

**catheters, pulmonary arterial**

- continuous mixed venous oxygen saturation, *In Vitro* calibration of, accuracy of, during cardiac surgery [Stensrud, Van Beck, de Castro, Sharp, Abenstein], A464
- mixed-venous saturation, does fiberoptic bundle design affect clinical accuracy of? [Durkan, Turner], A412
- mixed-venous saturation, new, perioperative evaluation of, in cardiac surgical patients [Pond, Blessios, Lappas, McCawley], A411
- noninvasive monitoring of mixed-venous oxygen saturation in infants by near infrared reflectance spectroscopy [Steven, Kurth, Phoon, Nicolson, Chance], A413
- pacing leads: *In Vivo* comparison [Mora, Stemp], A426
- pulmonary capillary pressure measured with, in surgical patients [Yamada, Suzukawa, Suzuki, Chinzei, Numata], A427
- REF-1, room temperature *versus* iced injectate in use of [Profeta, Roth, Wiener], A458
- venous oxygen saturation and [Auffray, Martin, Prima, Papazian, Gouin], A455

closed circuit anesthesia, sevoflurane in [Bitoh, Ikeda], A343

**computers**

- method to deliver preset inspired concentration of anesthetic regardless of degree of rebreathing [Perhag, Larsson, Luttrupp, Persson, Werner], A1010
- forced air warmer, thermal balance with, during abdominal surgery [Camus, Delva, Just, Crubille, Lienhart], A491

**humidifiers**

- bacteria killed by [Gilmour, Boyle, Streifel], A498

**inhalation therapy**

- metered dose inhaler, improved delivery efficacy of: further laboratory evaluation of drug release from nozzle extension [Peterfreund, Niven, Brain], A397

**lasers**

- airway surgery, heat-resistant tube safe for [Kaseno, Murakami, Kemmotsu], A889
- airway surgery, new ceramic endotracheal tube for, evaluation of [Sosis, Braverman, Ivankovich], A500
- airway surgery, new foil-wrapped silicone endotracheal tube designed for, evaluation of [Dillon, Sosis, Heller], A392
- CO<sub>2</sub>, risk of fire from, intraluminal gauge pressure of tracheal tubes and [San Giovanni, Pashayan, Roan, Gater, Gravenstein], A494
- CO<sub>2</sub> clinical model, tracheal tubes and risk of fire from, intraluminal gauge pressure of [San Giovanni, Pashayan, Gater, Roan, Gravenstein], A399
- CO<sub>2</sub> surgery, protective effect of helium on silicone endotracheal tube flammability during [Goode, Murray, Murray, Harbaugh], A393
- fires, stopped with metal anesthesia circuit components [Sosis, Braverman, Ivankovich], A396

- KTP, foil coverings for protecting endotracheal tubes from, evaluation of [Sosis, Braverman, Ivankovich], A501
- laser treatment of Port-Wine stains, laryngeal mask as airway during [Garbin, Bogetz, Grekin, Frieden], A953
- new resistant foam and silver foil wrapped endotracheal tube, evaluation of [Sosis, Braverman, Ivankovich], A502
- magnetic nuclear resonance**
- transcranial magnetic stimulation, effect of neuroleptanalgesia on motor potentials evoked by, in primates [Ghaly, Stone, Kartha, Asokan, Alexander], A595
- masks, anesthesia**
- comparison of laryngeal mask with endotracheal tube for airway control [Cork, Kaul, Frink, Standen, Depa], A1112
- laryngeal mask as airway during laser treatment of Port-Wine stains [Garbin, Bogetz, Grekin, Frieden], A953
- position of laryngeal mask airway as determined by magnetic resonance imaging [Denman, Goudsouzian, Cleveland, Shorten], A1045
- musical alarm tones, recognition of, evaluation of physicians' abilities in [Block], A497
- pacemaker**
- pulmonary artery catheter pacing leads: *In Vivo* comparison [Mora, Stemp], A426
- right ventricular inotropic effect of atrial pacing after coronary artery bypass grafting [Lancon, Pillet, Obadia, Caillard], A90
- transesophageal pacing and pharmacologic interventions in cardiac arrhythmias [Abadir, Kirkutis, Puodziukynas, Gintautas], A92
- treatment of sinus bradycardia and AV junctional rhythm with transesophageal atrial pacing: hemodynamic effects of pacing [Atee, Pattison, Mathews], A88
- pulse monitors**
- oximetry, does skin pigmentation affect accuracy of? *In Vitro* study [Volgyesi, PEng, Spahr-Schopfer], A406
- oximetry failure, digital block for [Grayson, Bourke], A407
- telemetric oximetry network, effects of default alarm limit settings on alarm distribution in, in ward setting [Pan, James], A405
- tourniquets**
- lower limb tourniquet, effect of, on body temperature in pediatric patients [Ginsberg, Bloch, Binner], A957
- pneumatic, hemodynamic effects of, in patients with and without cardiovascular disease [Fahmy, Patel, Sunder], A905
- transducers**
- fast flush technique does measure dynamic frequency response of entire monitoring system [Kleinman, Powell, Kumar, Gardner], A452
- tubes, endotracheal**
- ceramic, new, for laser airway surgery, evaluation of [Sosis, Braverman, Ivankovich], A500
- comparison of laryngeal mask with, for airway control [Cork, Kaul, Frink, Standen, Depa], A1112
- cuff, to reduce intracuff pressure [Guyton, Banner], A401
- cuffed, for pediatric cardiac surgery, cause low incidence of postoperative airway problems [Malmros, Fletcher, Jon-maker, Nordstrom], A931
- foil-wrapped silicone, new, designed for laser airway surgery, evaluation of [Dillon, Sosis, Heller], A392
- heat-resistant, safe for laser airway surgery [Kaseno, Murakami, Kemmotsu], A889
- intraluminal gauge pressure of, risk of fire from CO<sub>2</sub> lasers and [San Giovanni, Pashayan, Roan, Gater, Gravenstein], A494
- intraluminal gauge pressure of, risk of fire from CO<sub>2</sub> lasers—clinical model and [San Giovanni, Pashayan, Gater, Roan, Gravenstein], A399
- new resistant foam and silver foil wrapped, evaluation of [Sosis, Braverman, Ivankovich], A502
- protection from KTP laser, foil coverings for, evaluation of [Sosis, Braverman, Ivankovich], A501
- silicone, protective effect of helium on flammability of, during CO<sub>2</sub> laser surgery, [Goode, Murray, Murray, Harbaugh], A393
- special, prevention of cautery-induced fires with [Sosis, Braverman, Ivankovich], A395
- wire-reinforced,; composition affects response to external compression and kinking [Wissler, Gravenstein, Banner], A394
- valves**
- flush, of anesthesia machines, provision for effective jet ventilation by? [Gaughan, Benumof, Ozaki], A130
- vaporizers**
- anesthetic agent, accuracy of, improved by implementing self-performed calibration checks and selective recalibration [Nielsen, Pedersen, Knudsen, Jensen, Ibsen], A417
- calibrated enflurane, output of mixtures of isoflurane and halothane from, determination of [Sosis, Braverman, Ivankovich], A499
- contamination, preliminary results on incidence of, in selected U.S. hospitals [Popic, Jameson, Arndt], A901
- contemporary, consequences of misfilling with desflurane [Andrews, Johnston, Kramer], A887
- inhalation anesthetic delivery during patient transport, safety of [Friedhoff, Abenstein], A893
- loss of pressurization, desflurane overdose from [Johnston, Kramer, Arens], A416
- what really happens when wrong agent is poured into? [Shulte, Block], A420
- ventilators**
- evaluation of, within MRI environment [Klein, Blanch], A403
- Erythrocytes. See under Blood**
- Erythromycin. See under Antibiotics**
- Esmolol. See under Antagonists; Sympathetic nervous system, beta-adrenergic antagonists**
- Esophagus. See under Gastrointestinal tract**
- Etomidate. See under Anesthetics, intravenous**
- Evoked potentials. See under Brain**
- Eye**
- injury to, associated with anesthesia: closed claims analysis [Gild, Posner, Caplan, Cheney], A864
- intraocular pressure**
- effect of succinylcholine on, in human eye with extraocular muscles detached [Kelly, Dinner, Turner, Abramson, Haik, Daines], A804
- reduction of intubation responses, anesthetic requirements and, by dexmedetomidine, in ophthalmic surgery [Ali-Melkkila, Jaakola, Kanto, Scheinin, Kallio], A309
- monitoring orbicularis oculi is accurate indicator of vocal cords relaxation in atracurium-induced neuromuscular blockade [Ungureanu, Meistelman, Frossard, Donati], A797
- pupil**
- pupillary area fluctuations, continuous measurement of, as marker of autonomic nervous system function [Kimura, Komatsu, Shimada], A1003
- retinal blood flow, effects of halothane on, in cats [Roth], A377

## F

Famotidine. *See under* HistamineFenoldopam. *See under* Pharmacology; Sympathetic nervous system, pharmacologyFentanyl. *See under* Analgesics; Anesthetics, intravenousFiltration, glomerular. *See under* Kidney

Fluid balance

- 5% hypertonic saline allows rapid fluid loading before lumbar epidural anesthesia [Ph Veroli, Mazoit, Benhamou], A715
- brain water, ICP and brain relaxation: comparison of mannitol and furosemide [Schubert, Awad, Perez-Trepichio, Ebrahim, Bloomfield], A202
- effect of fluid loading on right ventricular function and hemodynamic state with aortic unclamping during abdominal surgery [Nakatsuka, Posner, Thomas], A105
- high quantity glucose and fluid administration, neurological status and brain edema unaffected by, following closed cranial injury in rats [Shapira, Artru, Cotev, Muggia-Sulam, Freund], A204
- hypertonic saline dextran resuscitation of intraoperative hypovolemia, less net volume loading with [Anaya, Drace, Myers, Kramer], A1122
- perioperative fluid shifts, influence of continuous epidural bupivacaine on [Burgess, Brooks, Wade, Perkins, Rodkey], A761
- volume loading, effect of, on ischemic heart [Coetzee, Fourie], A518

G

- G187084B. *See under Analgesics; Pharmacology*
- Gallamine. *See under Neuromuscular relaxants*
- Ganglionic blockade. *See under Sympathetic nervous system*
- Gas tension. *See under Measurement techniques*
- Gases, nonanesthetic
- carbon monoxide
    - spontaneous generation of, within anesthetic circuits [Moon, Ingram, Brunner, Meyer], A873
  - helium
    - protective effect of, on silicone endotracheal tube flammability during CO<sub>2</sub> laser surgery, [Goode, Murray, Murray, Harbaugh], A393
- Gastrointestinal tract
- esophagus
    - absence of heart rate variability in esophagectomized patients: probability of autonomic denervation of heart [Kimura, Komatsu, Takezawa, Shimada], A89
  - intestine
    - bowel function following major colon surgery, epidural narcotics do not delay return of [Hart, Faul, Buhman], A669
    - celiac ganglion stimulation, mesenteric venoconstriction in response to, role of  $\alpha$ -adrenoceptor subtype during [Tominaga, Stekiel, Bosnjak, Kampine], A570
    - "mesenteric traction syndrome" aspects of pathophysiology and treatment [Brinkman, Wolf, Walther, Ottinger, Seeling], A161
    - pulmonary shunt increased by abdominal mesenteric traction [Seltzer, Ritter, Starsnic, Torjman, Marr, Schieren], A118
  - necrotizing pancreatitis complicated by adult respiratory distress syndrome, release of cytokines in plasma and lymph during [Montravers, Chollet-Martin, Pasquier, Gauzit, Marmuse, Fichelle, Gougerot-Pocidallo, Desmots], A265
- stomach
- effects of preoperative erythromycin prophylaxis for ambulatory laparoscopy [Narchi, Elhaddoury, Locatelli, Benhamou], A22
  - evaluation of gastric emptying in severe burn patients [Ho, Wang, Ho, Hu, Lin], A293
- Genetic factors
- altered neuropeptide expression in rat model of neuropathic pain [Marchand, Wurm, Kato, Kream], A592

- calcitonin gene-related peptide release from trachea induced by electrical field stimulation, capsaicin, and potassium, in rat [Hua, Yaksh], A632
  - cloning gene controlling sensitivity to volatile anesthetics in *Caenorhabditis elegans* [Sedensky, Morgan, Hudson], A648
  - DNA mutations responsible for serum butyrylcholinesterase variants, identification of, permits better differentiation of aberrant drug responses [La Du, Primo-Parmo, van der Spek], A372
  - isolation of mutations that alter sensitivities to several anesthetics in *Caenorhabditis elegans* [Morgan, Sedensky, Thomas, Kiss], A649
  - mutants of *Saccharomyces cerevisiae* resistant to isoflurane [Peterson, Keil], A644
  - patients homozygous for atypical plasma cholinesterase gene, duration of action of mivacurium-induced neuromuscular block in [Ostergaard, Jensen, Jensen, Viby Mogensen], A774
  - sickle cell anemia, preoperative transfusion study in: preliminary report [Haber Kern, Vichinsky], A871
- Glomerular filtration. *See under Kidney*
- Glucocorticoids. *See under Hormones*
- Glucose. *See under Metabolism*
- Glycopyrrolate. *See under Parasympathetic nervous system*
- Guanfacine. *See under Sympathetic nervous system, alpha-adrenergic agonists*

H

- Halothane. *See under Anesthetics, volatile*
- Headache. *See under Complications*
- Heart
- arrhythmia
    - defibrillation threshold, effect of halothane on [Guo, Jones, Gelineau, Solomon, Handler], A574
    - malignant, early reappearance of, in postoperative period [Metzler, Mahla, Rotman, Bombotz, Rehak, List], A86
    - smokers more prone to, during rapid sequence [Martin, Stevens], A91
    - transesophageal pacing and pharmacologic interventions in [Abadir, Kirkutis, Puodziukynas, Gintautas], A92
    - treatment of sinus bradycardia and AV junctional rhythm with transesophageal atrial pacing: hemodynamic effects of pacing [Adee, Pattison, Mathews], A88
    - beta-adrenoceptor density in different human heart diseases and relationship to degree of heart failure [Steinfath, Lavicky, Schmitz, Scholz], A163
  - blood flow, myocardial
    - augmented by nitroglycerin, but myocardial depression not reversed, during intracoronary cocaine administration [Buffington], A509
    - compromised, critical level of hemodilution in: study on regional function and retransfusion [Spahn, Smith, Menius, McRae, Veronee, Leone], A517
    - coronary small artery constriction and simultaneous arteriolar dilation during hypercapnia [Habazettl, Conzen, Vollmar, Adili, Muller, Peter], A526
    - coronary vasodilation by contrast media: ionic *versus* non-ionic [Eckel, Kim, Ismail, Salem, Crystal], A525
    - differential effects of isoflurane and desflurane in isolated guinea pig hearts [Boban, Buljubasic, Stowe, Kampine, Bosnjak], A506
    - distribution, effects of sevoflurane and isoflurane on, in rats [Habazettl, Conzen, Vollmar, Peter, Messmer], A549
    - effects of halothane and isoflurane on, in chronically instrumented dogs [Wouters, van Aken, Schreinemakers, Flameng], A504

- effects of hyperosmotic saline solutions in [Eckel, Kim, Ismail, Salem, Crystal], A292
- endo/epicardial flow ratio with sevoflurane compared to other volatile agents [Cork, DiNardo, Hilwig, Kern], A505
- during halothane and isoflurane anesthesia, comparison of, in chronically instrumented dogs [Khalil, Jones, Foex], A503
- halothane vasodilation in coronary vascular smooth muscle, role of potassium channels on [Larach, Schuler, Rhone], A527
- hemodynamic and sedative effects of medetomidine and UK-14304, in chronically instrumented Yucatan mini swine [Bloor, Kim, Vainio], A577
- platelet interaction with, effect of halothane on [Gobeil, Blaise, Tanguay], A519
- prevention of hepatic ischemic injury-induced coronary vasoconstriction with mannitol or lazaroid [Pretto, Dorko], A221
- proximal and distal coronary arteries, differential response of, to intravenous anesthetics [Coughlan, Flynn, Bosnjak, Kampine, Warltier], A535
- regional, during cardiac surgery: measurement using Xe133 clearance with miniature epicardial detectors [Butterworth, Stump, Royster, Prielipp, Kon], A97
- regional assessment: left ventricular dysfunction due to isoflurane associated with verapamil [Arvieux, Fagret, Fargnoli, Nivet, Stieglitz, Comet], A507
- cardiac massage**
- cardiac cycle specific thoracic vest inflation during autonomic blockade, coronary occlusion, and cardiac arrest, cardiovascular effects of, in dogs [Peters, Ihle], A1113
- congenital defects**
- heart disease, aesthetic morbidity in patients undergoing non-cardiac surgery [Strafford, Henderson], A1056
- contractility**
- described by relationship between systolic pressure and stroke volume [Reitan, Moore, Kien, White], A1114
- coronary occlusion**
- effect of, on cardiac compensation during hemodilution [Crystal, Levy, Eckel, Kim, Chavez], A516
- effects of anesthetic agent, hypotension and, on renal and liver blood flow [Cork, DiNardo, Hilwig, Kern], A289
- perioperative myocardial ischemia in relation to anatomic characteristics of coronary arterial stenosis [Hogue, Herbst, Pond, Bowlin, Lappas], A96
- direct assessment of myocardial retrograde cardioplegia distribution during cardiac surgery [Aronson, Lee, Walker, Wiencek, Feinstein, Bilotta, Karp, Roizen], A68
- echocardiography**
- 2-D transesophageal, thermodilution *versus*: right ventricular ejection fraction measurement [Koorn, Reich, Tamman, Narang, Hillel], A386
- analysis of ventricular dynamics: reperfusion syndrome during orthotopic liver transplantation [Gabriel, Muller, Tuchy, Hackl, Zimpfer], A992
- biplane transesophageal, comparison of mitral valve regurgitant jet areas by [Carter, Davis], A389
- changes during cesarean delivery under regional anesthesia, assessment of [Utterback, James, Chen, Geiser], A1080
- differential ventricular cardioplegia preservation thresholds quantified by thermodilution and echocardiographic systolic performance indices [Rafferty, Durkin, Harris, Elefteriades, Hines, O'Connor], A143
- effect of electroconvulsive therapy on [Messina, Paranicas, Katz, Markowitz, Yao, Devereaux], A440
- evaluation of effects of preoperative normovolemic hemodilution by TEE in coronary artery disease [Catoire, Saada, Gormezano, Pichaud, Bonnet], A106
- measures of ischemia, effects of desflurane on hemodynamics and, [Helman, Bellows, Leung, Velasco, Mangano, SPI Research Group], A152
- pediatric transesophageal, evaluation of feasibility and utility in 129 examinations [Sorensen, Stevenson], A391
- severity of mitral regurgitation by TEE, potential intraoperative underestimation of [Konstadt, Louoie, Black, Rao, Scanlon], A111
- transesophageal, assessment of microembolization during cardiopulmonary bypass by [Calalang, Shapiro, Schwartz, Queeno, Shah, Hick, Meltzer], A64
- transesophageal, automated real-time analysis of [Cahalan, Ionescu, Melton], A385
- transesophageal, during orthotopic liver transplantation [Roberts, Duke, Gottlich, Ramsay], A388
- transesophageal, gastroesophageal injury and [Hulyalkar, Ayd, Casella], A387
- transesophageal, pulmonary artery pressures estimated by? [Muhideen, Oken, Kuecherer, Schiller, Cahalan], A384
- electrocardiography**
- changes during cesarean delivery under regional anesthesia, assessment of [Utterback, James, Chen, Geiser], A1080
- correlation between changes in, and intracranial blood following subarachnoid hemorrhage [Arya, Mannien, Gelb, Pelz], A176
- effect of electroconvulsive therapy on [Messina, Paranicas, Katz, Markowitz, Yao, Devereaux], A440
- metabolic and ECG changes associated with reperfusion during liver transplantation [Gabrielson, Nam, Reich], A990
- persistent ST changes on, identification of ischemia in presence of [Jain, Rao, Krishnamurthy, Krishnamachari, Wallis], A442
- prognostic significance of ST segment elevation in CABG surgery [Leung, Hollenberg, Mangano], A84
- ST-segment changes during cesarean section [Zakowski, Goldstein, Ramanathan, Turndorf], A1079
- epinephrine**
- effects of, on conduction velocity in Purkinje fibers in dogs [Vodanovic, Turner, Marjic, Kampine, Bosnjak], A569
- interaction of halothane and, on caffeine-induced calcium transients from single ventricular myocytes [Knight, Wilde, Haney], A364
- potential risks of high doses of, during CPR after short term cardiac arrest in porcine CPR model [Hornchen, Schuttler, Berg], A1116
- randomized blinded trial of amrinone and, and amrinone/epinephrine after cardiopulmonary bypass [Royster, Butterworth, Prielipp, Robertie, Kon], A148
- inotropism**
- assessment of negative inotropic effect of human albumin [Journois, Safran, Dru], A164
- atrial pacing after coronary artery bypass grafting and [Lancon, Pillet, Obadia, Caillard], A90
- chronically infarcted rat hearts demonstrates enhanced halothane myocardial depression in rats [Skeehan, Musch, Riley], A524
- cocaine depresses myocardial contractility and produces diastolic dysfunction in conscious dogs [Pagel, Power, Warltier], A508
- direct cardiac effects of propofol *in situ* canine hearts [Ismail, Kim, Salem, Crystal], A510
- direct depression of myocardial function by halothane in isolated, perfused infant rabbit heart [Palmisano, Kampine, Stowe, Bosnjak], A926
- direct effects of phentolamine and nitroprusside in isolated rabbit myocardium [Lee, Virtusio], A213
- effect of alfentanil, fentanyl, and sufentanil [Martin, Lin, Lee, Lee], A514
- effect of midazolam on cardiac pump performance and contractility [Messina, Paranicas, Yao, Devereaux], A154
- hydralazine *versus* trimethaphan on isolated rabbit myocardium [Lee, Virtusio, Liu], A138



- iontophoretic study of speed of action of various muscle relaxants [Law Min, Bekavac, Glavinovic, Donati, Bevan], A810
- of magnesium [Lin, Matin, Lee, Lee], A374
- myocardial contractility, effect of thiopental *versus* propofol on [Aasen, Rooney, Hirsch, Mathru, Kross, Rao], A511
- myocardial depressant effect of plasma from liver transplanted patients with post reperfusion syndrome: *In Vitro* study [Jayais, Chempla, Ecoffey, Descorps-Declere, Samii, Lecarpentier], A554
- myocardial performance of blood-perfused isolated rabbit heart preparation, effects of equipotent concentrations of propofol and thiopental on [Mouren, Albo, Plaud, Szekelely, Hendrix, Vertomen, Hebrard, Baron, Viars], A512
- negative effect of thiopental greater than propofol at equipotent concentrations [Cork, Azari, Kramer, Behr, Kaul], A317
- negative effects of propofol and midazolam not potentiated by alfentanil, in perfused isolated rat hearts [Rouge, Ouhayoun, Gantet, Ewquerre, Cathala], A513
- randomized blinded trial of amrinone, epinephrine, and aminone/epinephrine after cardiopulmonary bypass [Royster, Butterworth, Prielipp, Robertie, Kon], A148
- ischemia**
- assessment of cardiac risk before abdominal aortic surgery: unreliability of both dipyridamole thallium scintigraphy and gated radionuclide angiography [Baron, Mundler, Bertrand, Vicaut, Coriat, Kieffer, Viars], A100
- desflurane anesthesia and: comparative risk *versus* sufentanil anesthesia in patients undergoing coronary artery bypass graft surgery [Helman, Leung, Bellows, Pineda, Mangano, SPI Research Group], A1124
- echocardiographic measures of, effects of desflurane on hemodynamics and [Helman, Bellows, Leung, Velasco, Mangano, SPI Research Group], A152
- effect of volume loading on [Coetzee, Fourie], A518
- evidence for, during anesthesia, pulse oximetry uncovers hypoxemia and decreases incidence of: prospective study of 20,802 patients [Moller, Ravlo, Jensen, Rasmussen, Dyrland, Espersen, Pedersen, Rasmussen, Johannessen, Chraemmer-Jorgensen, Djernes, Wiberg-Jorgensen, Cooper, Gravenstein, Johansen], A1057
- global, dichloroacetate enhances myocardial recovery following [Wahr, Childs, Olsanski, Bolling], A521
- identification of, in presence of persistent ST changes on ECG [Jain, Rao, Krishnamurthy, Krishnamachari, Wallis], A442
- induced by intracoronary injection of endothelin, effects of thoracic epidural anesthesia on metabolism of, in dogs [Fujita, Tsuchida, Kawamata, Kobayashi, Namiki], A515
- low postoperative hematocrit associated with, in high-risk patients [Christopherson, Frank, Norris, Rock, Gottlieb, Beattie], A99
- normothermic, effect of nucleoside transport inhibitor on [Boutros, Flameng, van Aken], A522
- not prevented by clonidine, during noncardiac surgery [Lipazyc, Engelman], A93
- perioperative myocardial, in carotid endarterectomy [Landesberg, Eidelman, Erel, Anner, Assaf, Halimi, Luirra, Gotsman, Berlatzky, Cotev], A94
- perioperative myocardial, in relation to anatomic characteristics of coronary arterial stenosis [Hogue, Herbst, Pond, Bowlin, Lappas], A96
- postoperative, and infarction in noncardiac surgery patients, circadian variation of [Fleisher, Hawes, Rosenbaum], A102
- postoperative T-wave abnormalities in recovery room, incidence and outcome of patients with: retrospective analysis [Chhangani, Nedumogottil, Kartha], A1014
- prebypass myocardial, increased risk of, in CABG patients when treated with angiotensin-converting enzyme inhibitors [Schlumberger, Ceddaha, Raffin, Dubois, Fischler], A98
- protection against, use of myocardial tissue impedance to determine esmolol's effectiveness in [Howie, Romanelli, Hiestand, Liu, Rezaei, McSweeney], A443
- reperfusion and, in newborn heart: effect of glucose [McGowan, Downing], A1046
- total, effect of allopurinol on myocardial purine release after reperfusion and, in isolated rat heart [Kawabata, Benson, Goto, Nakazawa, Arakawa], A621
- use of putative excitation contraction uncoupler to improve function of isolated hearts after 22 hours of cold hypoperfusion [Stowe, Boban, Bosnjak, Goldberg, Kampine], A523
- metabolism**
- differential effects of isoflurane and desflurane in isolated guinea pig hearts [Boban, Buljubasic, Stowe, Kampine, Bosnjak], A506
- effect of allopurinol on myocardial purine release after total ischemia and reperfusion, in isolated rat heart [Kawabata, Benson, Goto, Nakazawa, Arakawa], A621
- effects of halothane on calcium and potassium currents in isolated smooth muscle cells of dog coronary arteries [Buljubasic, Rusch, Marijic, Kampine, Bosnjak], A370
- effects of halothane on single potassium channels in isolated smooth muscle cells of dog coronary arteries [Buljubasic, Marijic, Kampine, Bosnjak], A369
- of ischemic myocardium induced by intracoronary injection of endothelin, effects of thoracic epidural anesthesia on; in dogs [Fujita, Tsuchida, Kawamata, Kobayashi, Namiki], A515
- myocytes, electrically-stimulated, volatile anesthetics affect time course and amplitude of  $CA^{2+}$  transients in [Wilde, Davidson, Knight], A366
- myocytes, SR  $CA^{2+}$  release by caffeine in, volatile anesthetics affect time course and amplitude of [Wilde, Davidson, Knight], A365
- Na/Ca exchange in heart cells, inhibition of, by enflurane, isoflurane and halothane [Haworth, Goknur], A576
- nucleoside transport inhibitor, effect of, on normothermic ischemic heart [Boutros, Flameng, van Aken], A522
- single ventricular myocytes, caffeine-induced calcium transients from, interaction of epinephrine and halothane on [Knight, Wilde, Haney], A364
- use of putative excitation contraction uncoupler to improve function of isolated hearts after 22 hours of cold hypoperfusion [Stowe, Boban, Bosnjak, Goldberg, Kampine], A523
- mitral valve**
- mitral valve replacement, inhaled nitric oxide in pulmonary hypertension following [Girard, Lehot, Clerc, Ffrench, Estanove], A984
- regurgitant jet areas, comparison of, by biplane transesophageal echocardiography [Carter, Davis], A389
- regurgitation, V-waves insensitive monitors of, because of non-uniformity of left arial blood flow [Weiss, Savino], A147
- replacement, influence of moderate hypocapnia on pulmonary vascular tone following [Mahdi, Salem, Joseph, Paulissian, Hernandez], A166
- severity of mitral regurgitation by TEE, potential intraoperative underestimation of [Konstadt, Louoie, Black, Rao, Scanion], A111
- myocardial function**
- congestive heart failure, pharmacokinetics of fentanyl in [Norgaard, Pineda, McGlinch, Zimmerman, Estrin], A325
- effects of triiodothyronine on hemodynamic status and, in brain dead donors [Cohen, Goarin, Jacquens, Aurengo, Clergue, Viars], A1018

**myocardial infarction**

- chronic, demonstrates enhanced halothane myocardial depression, in rats [Skeehan, Musch, Riley], A524
- extent of, reperfusion-induced diastolic dysfunction correlates with [Johnston, Vinten-Johansen, Toombs, Anderson, Tommasi], A573

**nitroglycerin**

- coronary flow augmented by, but myocardial depression not reversed, during intracoronary cocaine administration [Buffington], A509

**pulse rate**

- absence of heart rate variability in esophagectomized patients: probability of autonomic denervation of heart [Kimura, Komatsu, Takezawa, Shimada], A89
- hemodynamic instability, are there any rules used for definition of?: medical decision making [East, Henderson, Pace, Morris, Brunner], A1059
- variability, changes in, phenylephrine-induced bradycardia does not correlate with [Jaffe, Fung, Behrman], A444

**Purkinje fibers**

- conduction velocity in, effects of epinephrine and volatile anesthetics on, in dogs [Vodanovic, Turner, Marijic, Kampine, Bosnjak], A569
- transient outward potassium current in, effects of volatile anesthetics on [Supan, Buljubasic, Marijic, Eskinder, Kampine, Bosnjak], A368

**resuscitation**

- cardiac cycle specific thoracic vest inflation during autonomic blockade, coronary occlusion, and cardiac arrest, cardiovascular effects of, in dogs [Peters, Ihle], A1113
- DNR orders in operating room: survey of anesthesiologists' opinions and concerns [Boyd, Boudreaux], A900
- DNR orders: should they apply in operating room? [Tenedios, Indeck, Turkewitz, Poler], A280
- do not resuscitate orders and anesthesiologist, survey on [Clemency], A888
- do not resuscitate orders in presurgical patient: study of U.S. Anesthesiology Department Policies [Rothenberg, Franklin, Ivankovich, McCarthy], A907
- improved with sodium bicarbonate, after ten minutes of cardiac arrest in dogs [Bircher], A246
- out-of-hospital, pharmacokinetics and comparative efficacy of epinephrine during [Schuttler, Hornchen, Bremer], A287
- potential risks of high doses of epinephrine during, after short term cardiac arrest in porcine CPR model [Hornchen, Schuttler, Berg], A1116

**tamponade**

- atrio-ventricular interdependence with [Beloucif, Takata, Shimada, Robotham], A1022
- magnesium sulfate on reflex sympathetic vasoconstriction and hypotension during acute hemorrhage and [Liao, Belani], A821

**transplantation**

- perioperative changes in IL-6 with [Sakai, Latson, Whitten, Elmore, Krishnan, Ring, Lipton, Giesecke], A107
- right ventricular function after [Bizouarn, Soulard, Treilhaud, Blanloeil, Train], A223

**ventricles**

- differential ventricular cardioplegia preservation thresholds quantified by thermodilution and echocardiographic systolic performance indices [Rafferty, Durkin, Harris, Eleferiades, Hines, O'Connor], A143
- echocardiographic analysis of ventricular dynamics: reperfusion syndrome during orthotopic liver transplantation [Gabriel, Muller, Tuchy, Hackl, Zimpfer], A992
- effect of fluid loading on right ventricular function and hemodynamic state with aortic unclamping during abdominal surgery [Nakatsuka, Posner, Thomas], A105

effects of urapidil and clonidine on left ventricular performance [Lepage, Pinaud, Malinovsky, Cozian, Souiron], A137

left ventricular dysfunction due to isoflurane associated with verapamil: regional myocardial blood flow assessment [Arvieux, Fagret, Fargnoli, Nivet, Stieglitz, Comet], A507

left ventricular systolic and diastolic function during treatment of post CABG hypertension [Davies, Karski, Teasdale, Ivanov, Young, Weisel], A145

relationship between systolic pressure and stroke volume describes myocardial contractility [Reitan, Moore, Kien, White], A1114

right, function of, after orthotopic heart transplantation [Bizouarn, Soulard, Treilhaud, Blanloeil, Train], A223

right, function of, antegrade *versus* retrograde cardioplegia influence on [Amory, Wanger, Weinstein], A150

right ventricular ejection fraction measurement: thermodilution *versus* 2-D transesophageal echocardiography [Koorn, Reich, Tamman, Narang, Hillel], A386

right ventricular infarction, extent of, reperfusion-induced diastolic dysfunction correlates with [Johnston, Vinten-Johansen, Toombs, Anderson, Tommasi], A573

**verapamil**

isoflurane associated with, left ventricular dysfunction due to: regional myocardial blood flow assessment [Arvieux, Fagret, Fargnoli, Nivet, Stieglitz, Comet], A507

**Heating. See under Temperature****Helium. See under Gases, nonanesthetic****Hematoma. See under Complications****Hemodilution. See under Blood****Hemodynamics. See under Measurement techniques****Hemorrhage**

acute, magnesium sulfate on reflex sympathetic vasoconstriction and hypotension during pericardial tamponade and [Liao, Belani], A821

epidural anesthesia worsens hypotension and uterine blood flow during, in gravid ewes [Vincent, Chestnut, Sipes, Thompson, Debruyne, Bleuer, Chatterjee], A823

graded, effect of, on liver oxygenation and ethanol clearance [Lund, Iannoli, Papadakos, Pearce], A216

hemorrhagic hypotension, does calcium chloride increase blood pressure and uterine blood flow during, in hypermagnesemic gravid ewes? [Vincent, Chestnut, Sipes, Thompson, Bleuer, Debruyne, Chatterjee], A822

shock, veno-arterial gradients for  $P_{CO_2}$  and  $pH$  reflect tissue hypoxia during, in dogs [Vanderlinden, Gilbert, Paques, Bakker, Vincent], A236

**Heparin. See under Blood****High frequency ventilation. See under Ventilation****Hippocampus. See under Brain****Histamine. See also under Pharmacology**

airway constriction following atracurium is due to histamine release [Mehr, Lindeman, Hirshman], A974

**famotidine**

oral, for aspiration prophylaxis in surgical outpatients [Solanki, Talke], A908

plasma, highly elevated during cardiac surgery [Alston], A60

**ranitidine**

water and, increase gastric  $pH$  and decrease gastric residual volume in outpatients [Ross, Momany], A1110

**Hormones****adrenal**

adrenal chromaffin cells, suppression of  $CA^{2+}$  dependent  $K^+$  conductance in, by halothane [Pancrazio, Lynch], A1038

subarachnoid adrenal medullary transplantation [Winnie, Krolick, Sagen, Pappas, Wang], A695

**adrenocorticotrophic**

ACTH and  $\beta$ -endorphin, post-translational processing of, in human pituitary [Bernard, Chronwall, Millington], A700  
do small children have limited adrenocortical response to, during abdominal surgery? [Wolf, Eyres, Laussen], A948  
pituitary-adrenal axis, epidural triamcinolone causes prolonged and severe suppression of [Kay, Raff, Findling], A694

**antidiuretic**

effects of vasopressin on regional blood volume in supine humans [Hopf, Klement, Stuhmeier, Wust, Peters], A160  
vasopressin dilates cerebral arteries in fetal sheep [Tong, Eisenach], A819

**corticosteroid**

do small children have limited adrenocortical response to ACTH during abdominal surgery? [Wolf, Eyres, Laussen], A948  
is urinary cortisol excretion measurement during surgery useful gauge of stress response? [Yorozu, Shigematsu, Miyazawa, Hiyama, Doi], A212  
pituitary-adrenal axis, epidural triamcinolone causes prolonged and severe suppression of [Kay, Raff, Findling], A694

**endothelin**

levels of, in patients requiring blood pressure reduction following cardiopulmonary bypass [Lawhorn, Nelson, Loneragan, Hudson], A50  
estrogen withdrawal increases cerebral vasoreactivity [Shay, Futo, Block, Badrov, Thisted, Moss], A540

**glucocorticoids**

high-dose regimen of triamcinolone induces resistance to vecuronium neuromuscular block in cats [Baker], A790  
mechanism of, in peripheral airways [Lindeman, Hirshman], A975

**messenger**

endothelin levels in patients requiring blood pressure reduction following cardiopulmonary bypass [Lawhorn, Nelson, Loneragan, Hudson], A50  
progesterone-mediated potentiation of spinal opiates [Carp, Jayaram], A838

**prostaglandins**

alteration of reactivity to, by halothane and isoflurane, in human cerebral arteries [Reinstrup, Uski, Messeter], A200  
changes in systemic and renal plasma prostanoid concentrations associated with alterations in renal function during hyperdynamic sepsis in sheep [Morel, Weber], A244  
effect of thromboxane receptor blockade following inhalation injury in sheep [Locik, Traber, Theissen, Flynn, Traber], A224  
effects of, on hepatic blood flow and oxygen balance during anesthesia of liver surgery [Kainuma, Nakashima, Sakuma, Kimura, Shimada], A141  
eicosanoid production, edema formation and: halothane-oxidant interactions in *Ex Vivo* perfused rabbit lung [Shayevitz, Johnson, Knight], A339  
eicosanoids, regional recovery of, after forebrain ischemia, by microdialysis, in rats [Patel, Drummond, Mitchell, Yaksh, Cole], A628  
indomethacin reduces carbon dioxide-induced elevation of intracranial pressure in patients with cerebral disorders [Taeishi, Sadamitsu, Soejima, Maekawa, Sanuki, Matsumoto, Nakashima], A188  
modulation by CO<sub>2</sub> and pH of reactivity to PGF<sub>2a</sub> in human cerebral arteries [Reinstrup, Uski, Messeter], A199  
right ventricular function after orthotopic heart transplantation [Bizouarn, Soulard, Treilhaud, Blanloeil, Train], A223  
substance P levels are decreased in pregnancy [Mouton, Kambam, Naukum, Blanks, Rama Sastry], A842

**thyroid**

hyperparathyroidism, succinylcholine dose-response in [Roland, Villiers, Lequeau, Roupie, Sarfate, Eurin], A808  
triiodothyronine, effects of, on hemodynamic status and myocardial function in brain dead donors [Cohen, Goarin, Jacquens, Aurengo, Clergue, Viars], A1018

**Humidifiers. See under Equipment**

**Hydralazine. See under Pharmacology**

**Hydromorphone. See under Analgesics**

**Hypercarbia. See under Carbon dioxide**

**Hyperglycemia. See under Metabolism**

**Hypertension. See under Blood pressure; Complications**

**Hyperthermia**

**malignant**

children labeled as "malignant hyperthermia susceptible," perioperative course of [Yentis, Hartley], A870  
evidence of heterogeneity in pathogenesis of; excessive acylation of triglycerides in muscle from swine exhibiting clinical MH [Fletcher, Erwin, Tripolitis, Yudkowsky, Rosenberg], A298  
human and porcine, halothane increases open states of calcium release channel from [Nelson], A301  
human skinned muscle fibers, fiber-type specific caffeine sensitivities in [Adnet, Bromberg, Haudecoeur, Krivosic-Horber, Krivosic, Adamantidis, Reyford], A294  
humans diagnosed as susceptible to, altered lipid metabolism in primary cultures of skeletal muscle from [Fletcher, Jiang, Gong, Rosenberg], A638  
implications for; fatty acids markedly lower threshold for halothane-induced Ca<sup>2+</sup> release from terminal cisternae [Fletcher, Mayerberger, Tripolitis, Yudkowsky, Rosenberg], A297  
inositol triphosphate and, in human skeletal muscle [Scholz, Hartung, Troll, Patten, Schulte am Esch], A641  
presentations of, in community—MH hotline 1990 [Greenberg, Rosenberg], A869  
relative potency of desflurane, halothane, and isoflurane in triggering episodes of, in swine [Gammel, Wedel, Milde, Iaizzo], A296  
ryanodine contractures in, diagnostic evaluation of, in human and pig skeletal muscle [Nelson], A302  
scorpion venom that activates normal and inhibits susceptible ryanodine receptors [Valdivia, Hayek, Hogan, Coronado], A643  
susceptibility to, effects of calcitonin gene-related peptide on skeletal muscle from patients evaluated for [Fleming, Lewis, Willeford], A813  
susceptible muscle, calcium agonist bay K8644 potentiates isoflurane/halothane *In Vitro* contracture response of, to same extent [Adnet, Krivosic-Horber, Adamantidis, Reyford, Haudecoeur, Dupuis], A295

**Hypnotics**

**barbiturates**

pentobarbital, inhibits Ca<sup>2+</sup>-sensitive secretion in basophils [Robinson-White], A994  
pentobarbital action on sodium channels, molecular sites of [Wang, Kauff, Wartenberg, Duch, Urban], A363  
propofol *versus* morphine and, in sedation of patients with severe head injury [Pearson, Kruse, Demetron], A248

**benzodiazepines**

effect of midazolam on cardiac pump performance and contractility [Messina, Paranicas, Yao, Devereaux], A154  
efficacy of additional flumazenil after ambulatory general anesthesia with midazolam [Bizzarri-Schmid, Philip, Manzi, Dedrick, Mallampati, Mushlin], A30  
flumazenil improves midazolam impaired cognitive function [Ritter, Hoshizaki, Stead], A37  
indirect memory during anesthesia: effect of midazolam [Westmoreland, Sebel, Winograd, Goldman], A192

- intranasal midazolam, effect of, on memory in pediatric patients [Twersky, Hartung, McClain, Berger, Beaton], A919
- intranasal midazolam, pharmacokinetics and clinical effects of: influence of cimetidine [Servin, Laxenaire, Samain, Farinotti, Desmonts], A352
- lorazepam, comparison of droperidol to, as antiemetic in children undergoing strabismus operations on outpatient basis [Khalil, Berry, Howard, Hanis, Mazow], A958
- midazolam, depression of swallowing reflex two hours after [Lambert, D'Honneur, Abhay, Gail, Duvaldestin], A891
- midazolam, intranasal and intravenous, pharmacokinetics of, in young children [Delaunay, Murat, Rey, Pons, Saint-Maurice], A923
- midazolam, synergistic interaction between  $\alpha_2$  adrenergic agonists and benzodiazepines in rats [Salonen, Reid, Maze], A1125
- midazolam and diazepam, comparative amnesic effects of: quantitative assessment [Parris, Schwartz, Bean, Johnson, Fraifeld], A1031
- midazolam infusion for conscious sedation following abdominal aortic surgery [Miller, Martineau, Dean, Vallee, LeBel], A271
- oral midazolam premedication, safety of, for use in children [Spahr-Schopfer, McMillan, Sikich, Hartley, Lerman], A921
- oral midazolam premedication in pediatric day surgery, efficacy and feasibility of [McMillan, Spahr-Schopfer, Sikich, Hartley], A27
- propofol bolus *versus* infusion, comparison with midazolam for monitored sedation [Pratila, Fischer, Alagesan, Alagesan, Reinsel, Pratilas], A20
- response of human CNS sodium channels to midazolam [Frenkel, Urban], A646
- reversal of midazolam-induced anesthesia by flumazenil during stereotaxic thalamic stimulation [Berberich, Orliaguet, Nguyen, Rostaing, Duvaldestin], A189
- transmucosal midazolam for preinduction of anesthesia in pediatric patients: comparison of intranasal and sublingual routes [Karl, Larach, Ruffle], A922
- diazepam**  
comparative amnesic effects of midazolam and: quantitative assessment [Parris, Schwartz, Bean, Johnson, Fraifeld], A1031
- lorazepam**  
comparison of droperidol to, as antiemetic in children undergoing strabismus operations on outpatient basis [Khalil, Berry, Howard, Hanis, Mazow], A958
- midazolam**  
ambulatory general anesthesia with, efficacy of additional flumazenil after [Bizzarri-Schmid, Philip, Manzi, Dedrick, Mallampati, Mushlin], A30  
comparative amnesic effects of diazepam and: quantitative assessment [Parris, Schwartz, Bean, Johnson, Fraifeld], A1031  
comparison with propofol for monitored sedation [Pratila, Fischer, Alagesan, Alagesan, Reinsel, Pratilas], A20  
depression of swallowing reflex two hours after [Lambert, D'Honneur, Abhay, Gail, Duvaldestin], A891  
effect of; indirect memory during anesthesia [Westmoreland, Sebel, Winograd, Goldman], A192  
effect of, on cardiac pump performance and contractility [Mesina, Paranicas, Yao, Devereaux], A154  
flumazenil improves impaired cognitive function [Ritter, Hoshizaki, Stead], A37  
infusion of, for conscious sedation following abdominal aortic surgery [Miller, Martineau, Dean, Vallee, LeBel], A271  
intranasal, effect of, on memory in pediatric patients [Twersky, Hartung, McClain, Berger, Beaton], A919  
intranasal, pharmacokinetics and clinical effects of: influence of cimetidine [Servin, Laxenaire, Samain, Farinotti, Desmonts], A352  
intranasal and intravenous, pharmacokinetics of, in young children [Delaunay, Murat, Rey, Pons, Saint-Maurice], A923  
oral premedication, safety of, for use in children [Spahr-Schopfer, McMillan, Sikich, Hartley, Lerman], A921  
oral premedication in pediatric day surgery, efficacy and feasibility of [McMillan, Spahr-Schopfer, Sikich, Hartley], A27  
reversal of anesthesia induced by, flumazenil during stereotaxic thalamic stimulation and [Berberich, Orliaguet, Nguyen, Rostaing, Duvaldestin], A189  
synergistic interaction between  $\alpha_2$  adrenergic agonists and benzodiazepines in rats [Salonen, Reid, Maze], A1125  
transmucosal, for preinduction of anesthesia in pediatric patients: comparison of intranasal and sublingual routes [Karl, Larach, Ruffle], A922
- pentobarbital**  
action of, on sodium channels, molecular sites of [Wang, Kauff, Wartenberg, Duch, Urban], A363  
inhibits  $Ca^{2+}$ -sensitive secretion in basophils [Robinson-White], A994
- Hypocarbica.** *See under Carbon dioxide*
- Hypoglycemia.** *See under Metabolism*
- Hypotensive anesthesia.** *See under Anesthetic techniques*
- Hypothermia.** *See under Anesthetic techniques*
- Hypoxia.** *See also under Brain*  
altered release and metabolism of norepinephrine in superfused canine saphenous veins in presence of [Kamath, Rorie, Tyce], A557  
hypoxemia on admission to postanesthetic care unit [Deepika, Makkaoui, Archatz-Deresz, Bikhazi], A899  
loss of hypoxic ventilatory response following bilateral modified radical neck dissection [Moorthy, Sullivan, Fallon, Dierdorf, Radpour], A1099  
respiratory sensitivity to, after brifentanyl [Cigada, Afifi, Glass, Esposito, Camporesi], A1097  
sustained, ventilatory response at four levels of [Temp, Bigoni, Ward], A1098  
ventilatory response to, in awake and anesthetized humans [Sjorgren, Ebberyd, Sollevi, Lindahl], A1102
- I
- Immune response**  
effects of impact administration on, in critically ill [Singer, Katz, Bursztein, Pollack, Kvetan, Askanazi], A270  
interaction of antibiotics on pipecuronium-induced neuromuscular blockade [de Gouw, Crul, Vandermeersch, Mulier, van Aken], A776  
liver cytosolic proteins from halothane-treated mice recognized by antibodies in halothane hepatitis patients' sera [Lindsey, Martin, Pohl], A993  
T-cell subsets and antigen-presenting accessory cells, differential effect of isoflurane on, *In Vitro* [Crun, Maurer, Torjman, Schieren, Maurer], A1000
- Induction.** *See under Anesthetic techniques*
- Infection**  
antimicrobial properties, in agents used for epidural analgesia? [Feldman, Chapin, Turner, Contant], A835
- bacteremia**  
contamination of sterile solutions in glass ampules [Zacher, Evans], A38  
bacteria killed by humidifiers [Gilmour, Boyle, Streifel], A498

- herpes simplex virus-specific cytotoxic T lymphocyte function, effect of morphine on: possible mechanism involved in HSV recurrent infection following epidural morphine administration [Bonneau, Sheridan, McDonald, Glaser], A590
- maxillary sinusitis, endotracheal intubation-induced: prospective randomized study [Leguillou, Rouby, Xiang, Zouaoui, Nicolas, Ghedira, Gosgnach, Viars], A1020
- prediction of performance in anesthesiology residency training, can personality profile be used in? [McDonald, Gough, Bradley, Lingam, Gupta], A875
- preliminary results on incidence of vaporizer contamination in selected U.S. hospitals [Popic, Jameson, Arndt], A901
- pulmonary**
- nosocomial lung infection in ventilated patients, prevention of: selective decontamination *versus* endotracheal administration of aminoglycoside antibiotic [Bach, Bohrer, Geiss, Martin], A1013
- nosocomial pneumonia, endotracheal intubation-induced sinusitis and, in critically ill patients [Leguillou, Rouby, Xiang, Nicolas, Candaut, Viars], A1019
- septicemia**
- cardiorespiratory effects of pentoxifylline in septic and non-septic states [Mayer, Steltzer, Klimscha, Oismuller, Hammerle], A232
- cytokine elevation in children with ARDS and [Costarino, Sullivan, Harris, Kilpatrick], A245
- dextran 60 or fluid gelatin for fluid expansion in [Auffray, Papazian, Perrin, Saux, Martin], A242
- hyperdynamic, alterations in renal function during, changes in systemic and renal plasma prostanoid concentrations associated with, in sheep [Morel, Weber], A244
- improvement of oxygen utilization by pentoxifylline in [Steltzer, Mayer, Weinstabl, Oismuller, Hammerle], A231
- levels of messenger RNA coding for phosphoenolpyruvate carboxykinase increased in, in rat [Deuschman, Clemens, Buchman], A291
- norepinephrine *versus* epinephrine in septic shock [Francois, Blanloeil, Lejus, Michel, Pinaud], A241
- relationship between oxygen delivery and mixed venous oxygen saturation during [Levrout, Jambou, Kaidomar, Grimaud], A234
- selective changes induced by, in regional vascular reactivity to norepinephrine and fenoldopam in sheep [Schiffer, Schwiager, Poinot, Klohn, Mentha, Gaumann, Morel], A243
- treated by norepinephrine, hemodynamic effects of dobutamine during [Blanloeil, Lejus, Francois, Michel, Pinaud], A240
- In Vivo* modulation of human neutrophil function by pentoxifylline in [Oismuller, Mayer, Steltzer, Michsche, Hammerle], A233
- Staphylococcus aureus*, growth of, in four intravenous anesthetics [Sosis, Braverman, Villaflor], A439
- Inhalation therapy. See under Equipment**
- Inotropism. See under Heart**
- Insufflation. See under Anesthetic techniques**
- Insulin. See under Metabolism**
- Intensive care**
- anemia in, transfusion requirement and role of phlebotomy [Gettinger, Parsonnet, Corwin], A239
- bedside blood gas and electrolyte monitoring in [Prielipp, Zaloga, Dudas, Black], A485
- cardiopulmonary and metabolic response to chest physical therapy: stressing critically ill patient [Weissman, Kemper], A238
- endotracheal intubation-induced sinusitis and nosocomial pneumonia in critically ill patients [Leguillou, Rouby, Xiang, Nicolas, Candaut, Viars], A1019
- head injury patients, capnography for monitoring hyperventilation of [Liu, Leighton, Caron, McBride, Bongard], A249
- head trauma patients, urapidil increases intracranial pressure in [Germann, Weinstabl, Mayer, Krafft, Hammerle], A247
- hypermetabolic and immune effects of impact administration in critically ill [Singer, Katz, Bursztein, Pollack, Kvetan, Askanazi], A270
- infusion of vasoconstrictive agents in, comparison of central and peripheral intraarterial blood pressure measurements in [Barr, Mihm, Gaeta], A283
- midazolam *versus* propofol for prolonged sedation in [Geller, Weinbroum, Sorkine, Silbiger, Halpern], A269
- postanesthetic care unit, hypoxemia on admission to [Deepika, Makkaoui, Archatz-Deresz, Bikhazi], A899
- practice patterns of anesthesia intensivists in use of muscle relaxants, national survey on [Klessig, Geiger, Murray, Cousins], A290
- respiratory pattern and function in neonate, effect of branched-chain amino acid supplementation on [Blazer, Reinersman, Askanazi, Hollinger, Kvetan, Katz, Fleischman], A1093
- sedation, following CABG: propofol *versus* midazolam [Higgins, Yared, Estafanous, Coyle, Vassel, Goodale], A278
- transcutaneous CO<sub>2</sub> monitoring in, at 42°C probe temperature shows good correlation with arterial Pco<sub>2</sub> [Weir, Wong, Tremper, Zaccari, Daves, Patel], A493
- Intercostal nerve block. See under Anesthetic techniques, regional**
- Intestine. See under Gastrointestinal tract**
- Intracranial pressure. See under Brain**
- Intraocular pressure. See under Eye**
- Intravenous anesthetics. See Anesthetics, intravenous**
- Intravenous anesthetic techniques. See under Anesthetic techniques**
- Intravenous catheters. See under Equipment**
- Intubation, tracheal**
- complications**
- endotracheal intubation-induced maxillary sinusitis: prospective randomized study [Leguillou, Rouby, Xiang, Zouaoui, Nicolas, Ghedira, Gosgnach, Viars], A1020
- endotracheal intubation-induced sinusitis and nosocomial pneumonia in critically ill patients [Leguillou, Rouby, Xiang, Nicolas, Candaut, Viars], A1019
- hemodynamic response to, not attenuated by isoflurane at depths producing burst-suppression EEG pattern [Spackman, Messick, Sharbrough], A355
- intubation conditions and time-course of action of ORG 9426 [Vandenbrom, Wierda, Huizinga, Hennis], A788
- ORG 9426 used for: comparison with succinylcholine [Dubois, Shearow, Tran, Kataria, Rever, Gadde, Lea], A1066
- after propofol anesthesia without neuromuscular blocker is not practical [Kothary, Pandit, Lebenbom-Mansour, Levy, Randel], A1111
- semi-emergent: hemodynamic changes [Mort, Brakoniecki], A1017
- technique**
- blind oral intubation, development and evaluation of approach to [Vacanti, Roberts], A1007
- cardiovascular and hormonal stress response to, effects of alfentanil on [Miller, O'Brien, Martineau, Abou-Hamad, Hull, Greenway, Hindmarsh], A82
- difficult, radiological prediction of; posterior CO-1 and C1-2 Gaps [Calder, Calder, Crockard], A190
- difficult intubation in newborns and infants using ultra thin fiberoptic bronchoscope [Monrigal, Granry, Le Rolle, Rod, Cavellat], A1044
- QT interval during, with propofol or thiopental [Guiraud, Chassard, Gelas, Bouletreau], A83

superior laryngeal nerve block for laryngoscopy and intubation [Taniguchi, Fukunaga, Harano, Totoki, Takasaki], A81

**Ions****calcium**

- antagonist, adenosine inhibits oxygen free radical production of human polymorphonuclear leukocytes by action as [Thiel, Bardenheuer], A1016
- $\beta$ -agonists decrease open-state probability of voltage-dependent calcium channels in airway smooth muscle [Tomasic, Boyle, Kotlikoff], A584
- $\text{Ca}^{2+}$  exchange in endothelial cells, differential effects of halothane and isoflurane on [Shayevitz, Williams, Varani], A1001
- $\text{Ca}^{2+}$  homeostasis in oxidant-injured endothelium, effects of halothane and isoflurane on [Shayevitz, Williams, Varani], A1002
- $\text{Ca}^{2+}$  transients in electrically-stimulated cardiac myocytes, volatile anesthetics affect time course and amplitude of [Wilde, Davidson, Knight], A366
- $\text{CaCl}_2$  pretreatment, in prevention of concentration-dependent tetanic contraction induced by subarachnoid disodium EDTA [Wang, Li, Hiller, Simon, Budzilovich], A651
- channel blocker, propofol as, and produces endothelium-independent vasodilation [Chang, Lacy, Davis], A536
- currents, in isolated smooth muscle cells of dog coronary arteries, effects of halothane on [Buljubasic, Rusch, Marijic, Kampine, Bosnjak], A370
- cytosolic  $\text{Ca}^{2+}$ , elevated, cell death from chemical anoxia in neuronal cell line not mediated by [Johnson, Uhl, Gores, Sill], A612
- cytosolic  $\text{Ca}^{2+}$  increase and contraction in vascular smooth muscle of rat aorta, inhibitory effect of halothane and isoflurane on [Tsuchida, Notsuki, Yamakage, Fujita, Namiki], A531
- cytosolic ionized concentration of, decreased by halothane during acetylcholine-induced contraction of canine trachealis muscle [Jones, Housmans, Warner, Rehder], A639
- does calcium chloride increase blood pressure and uterine blood flow during hemorrhagic hypotension in hypermagnesemic gravid ewes? [Vincent, Chestnut, Sipes, Thompson, Bleuer, Debruyne, Chatterjee], A822
- endothelial cell calcium mobilization altered by volatile anesthetics [Loeb, O'Brien, Longnecker], A533
- halothane-induced release of, from terminal cisternae, fatty acids markedly lower threshold for; implications for malignant hyperthermia [Fletcher, Mayerberger, Tripolitis, Yudkowsky, Rosenberg], A297
- high-threshold calcium current, cannabinoid inhibition of [Mackie, Hille], A585
- levels of, during fresh frozen plasma administration in patients with end-stage liver disease [Washington, Prager, Kelley, White, Cauldwell], A277
- pentobarbital inhibits  $\text{Ca}^{2+}$ -sensitive secretion in basophils [Robinson-White], A994
- release channel, halothane increases open states of, from human and porcine malignant hyperthermia [Nelson], A301
- role of cytosolic  $\text{Ca}^{2+}$ , cAMP and protein kinase C in effect of halothane on canine tracheal smooth muscle [Yamakage, Namiki], A354
- SR  $\text{Ca}^{2+}$  release by caffeine in cardiac myocytes, volatile anesthetics affect time course and amplitude of [Wilde, Davidson, Knight], A365
- suppression of  $\text{Ca}^{2+}$  dependent  $\text{K}^+$  conductance in adrenal chromaffin cells by halothane [Pancrazio, Lynch], A1038
- magnesium**
- antiarrhythmic doses of, does it potentiate vecuronium neuromuscular block? [Butterworth, Frawley, Dudas, Cole], A802

decreases gravid ewe carotid and uterine artery dose response to phenylephrine *In Vitro* [Bollen, Chestnut, Liu, Weiner], A820

on reflex sympathetic vasoconstriction and hypotension during pericardial tamponade and acute hemorrhage [Liao, Belani], A821

inotropism of [Lin, Matin, Lee, Lee], A374

**potassium**

- ATP-sensitive  $\text{K}^+$  current, activation of [Deutsch, Klitzner, Weiss], A555
- channels, role of, on halothane vasodilation in coronary vascular smooth muscle, [Larach, Schuler, Rhone], A527
- cloned channels of, using voltage clamp techniques, molecular basis of ketamine action on [Kulkarni, Bayley, Anantharam, Treisman], A383
- currents, in isolated smooth muscle cells of dog coronary arteries, effects of halothane on [Buljubasic, Rusch, Marijic, Kampine, Bosnjak], A370
- hyperkalemia with blood transfusion in emergent and trauma surgery [Wall, Pavlin], A250
- single channels, in isolated smooth muscle cells of dog coronary arteries, effects of halothane on [Buljubasic, Marijic, Kampine, Bosnjak], A369
- suppression of  $\text{Ca}^{2+}$  dependent  $\text{K}^+$  conductance in adrenal chromaffin cells by halothane [Pancrazio, Lynch], A1038
- transient outward current of, in Purkinje fibers, effects of volatile anesthetics on [Supan, Buljubasic, Marijic, Es-kinder, Kampine, Bosnjak], A368

**sodium**

- channels, molecular sites of pentobarbital action on [Wang, Kauff, Wartenberg, Duch, Urban], A363
- channels, single, local anesthetics manifest two distinct modes of blockade of [Gingrich, Beardsley, Yue], A687
- hyperosmotic saline solutions, effects of, in coronary circulation [Eckel, Kim, Ismail, Salem, Crystal], A292
- levels of, in hippocampal slice, thiopental and tetrodotoxin have similar effects on, in rat [Abramowicz, Kass, Cottrell], A607
- rapid increase in, associated with CPM after liver transplantation [Videira, Kang, Martinez, DeWolf, Aggarwal, Gasior], A222

**Ischemia.** *See under Brain; Heart*

**Isoflurane.** *See under Anesthetics, volatile*

**J**

**Jet ventilation.** *See under Ventilation*

**Jugular vein.** *See under Veins*

**K**

**Ketamine.** *See under Anesthetics, intravenous*

**Ketanserine.** *See under Pharmacology*

**Ketorolac.** *See under Analgesics; Pharmacology*

**Kidney****blood flow**

- during controlled hypotension with adenosine or sodium nitroprusside in dogs under halothane anesthesia [Jarnberg, Jamond, Westman, Woods], A552
- distribution, effects of sevoflurane and isoflurane on, in rats [Habazettl, Conzen, Vollmar, Peter, Messmer], A549
- effects of acute coronary stenosis, anesthetic agent, and hypotension on [Cork, DiNardo, Hilwig, Kern], A289
- during orthotopic liver transplantation, comparative evolution of, with and without veno-venous bypass [Veroli, Elhage, Gillon, Descorps-Declere, Jayais, Ecoffey], A219
- regional hemodynamic dose-responses to fenoldopam compared to dopamine in sedated sheep [Schwieger, Schiffer, Poinot, Klohn, Mentha, Guamann, Morel], A563

**failure**

- hemodynamic changes during hemodiafiltration onset [Merle, Fulgencio, Troche, Zazzo], A276
- hemofiltration, cytokines in plasma and ultrafiltrate in relation to [Tonnesen, Hansen, Hohndorf, Bendtzen, Diamant], A266

**filtration, glomerular**

- comparison of inulin clearance with transcutaneous detection of [Bauman, Kelly, Scuderi, Lorentz, Watson], A435
- transcutaneously detected inulin clearance and, inherent variability of, in humans [Bauman, Scuderi, Kelly, Lorentz, Watson], A484

**function**

- alterations in, during hyperdynamic sepsis in sheep, changes in systemic and renal plasma prostanoic concentrations associated with, [Morel, Weber], A244
- during controlled hypotension with adenosine or sodium nitroprusside in dogs under halothane anesthesia [Jarnberg, Jamond, Westman, Woods], A552
- effect of mannitol on, during coronary artery bypass [Gehr, Gehr, Yoch, Nakatsuka, Wolman], A67
- hemodynamic changes during hemodiafiltration onset [Merle, Fulgencio, Troche, Zazzo], A276
- hemofiltration, cytokines in plasma and ultrafiltrate in relation to [Tonnesen, Hansen, Hohndorf, Bendtzen, Diamant], A266
- hormonal influences on, during orthotopic liver transplantation [Roberts, Sakai, Duke, Ramsay, Whitten], A622
- ischemic, effects of inhalational anesthetics on, in rats [Yoshimura, Sameshima, Miyao, Oda, Yoshida], A335
- not influenced by differences in pH-management and pulsatile/non-pulsatile perfusion during CPB [Badner, Murkin, Lok], A65
- proximal and distal sodium reabsorptions, changes in, during standardized anesthesia and surgery in man [Hadj-Aissa, Mercatello, Coronel, Chery, Perrot, Naouri, Pozet, Tissot, Gharib, Moskovtchenko], A359
- renal extraction ratio of para amino hippuric acid during anesthesia and surgery in human [Mercatello, Pozei, Martin, Riegert, Long, Baude, Chabrol, Dubernard, Moskovtchenko], A142

**transplantation**

- evaluation of proconvulsant effect of laudanone in recipient [Lepage, Athouel, Vecherini, Malinovsky, Cozian], A781
- hemodynamic effects of OKT3 during [Robinson], A139

**L**

**Labetalol.** See under Pharmacology

**Lactate.** See under Metabolism

**Laryngeal mask.** See under Equipment

**Larynx**

**spasm**

- laryngospasm during halothane anesthesia, intravenous lidocaine inhibition of, in dogs [Jarnberg, Andersen, Cohen, Jamond, Smith], A971

**Lasers.** See under Equipment

**Latex.** See under Pharmacology

**L-dopa.** See under Pharmacology

**Leukocytes.** See under Blood

**Lidocaine.** See under Anesthetics, local

**Lipid.** See under Metabolism

**Liver**

**blood flow**

- effect of graded hemorrhage on liver oxygenation and ethanol clearance [Lund, Iannoli, Papadacos, Pearce], A216
- effects of acute coronary stenosis, anesthetic agent, and hypotension on [Cork, DiNardo, Hilwig, Kern], A289

oxygen balance and, effects of prostaglandin E1 on, during anesthesia of liver surgery [Kainuma, Nakashima, Sakuma, Kimura, Shimada], A141

regional hemodynamic dose-responses to fenoldopam compared to dopamine in sedated sheep [Schwieger, Schiffer, Poinot, Klohn, Mentha, Guamann, Morel], A563

during sevoflurane and isoflurane in rats [Vollmar, Conzen, Habazettl, Peter, Messmer], A550

total and splanchnic O<sub>2</sub> deliveries, discrepancy between, during dobutamine, dopamine, and norepinephrine [Noldge, Priebe, Armbruster, Muller, Haberstroh, Geiger], A556

after transplantation, effects of nicardipine hydrochloride on [Raucoules, Ichai, Drici, Goubaux, Gugenheim, Grimaud], A220

**disease**

end-stage, fresh frozen plasma administration in, ionized calcium levels during [Washington, Prager, Kelley, White, Cauldwell], A277

**function**

effects of sevoflurane on, using low flow system [Yasuda, Mishina, Miyano, Tanifuji, Amaki, Kobayashi], A345

normal versus hepatic dysfunction: pharmacokinetics, onset, and duration of action of rocuronium in humans [Magorian, Wood, Caldwell, Szenohradszky, Segredo, Sharma, Gruenke, Miller], A1069

glucose/insulin decreases potassium level in anhepatic patients [Frenette, De Wolf, Kang, Tang], A217

**metabolism**

atracurium and its metabolites in isolated perfused rat liver: biochemical and morphological observations [Reckendorfer, Burgmann, Sperlich, Tuchy, Schwarz], A304

fatty acid alterations in phospholipids of perfused rat liver by halothane [Franks, Kruskal, England, Surber, Sastry], A337

microsomal drug, inhibition of, by atracurium administration [Bohrer, Schmidt, Augenstein, Bach, Martin], A356

microsomal ketamine, stereochemical aspects of, in human [Kharasch, Kunze, Herrmann], A382

volatile anesthetic defluorination: role of cytochrome P450IIE1 [Kharasch, Thummel], A350

**oxygen consumption**

blood flow and, effects of prostaglandin E1 on, during anesthesia of liver surgery [Kainuma, Nakashima, Sakuma, Kimura, Shimada], A141

continuous monitoring of, predicts postoperative liver dysfunction [Nakashima, Kainuma, Sakuma, Kawase, Shimada], A414

effect of graded hemorrhage on [Lund, Iannoli, Papadacos, Pearce], A216

prevention of hepatic ischemic injury-induced coronary vasoconstriction with mannitol or lazaroid [Pretto, Dorko], A221

**toxicity**

liver cytosolic proteins from halothane-treated mice recognized by antibodies in halothane hepatitis patients' sera [Lindsey, Martin, Pohl], A993

**transplantation**

changes in IL-6 during [Sakai, Whitten, Roberts, Latson, Krishnan, Lipton, Ramsay, Giesecke], A624

comparative evolution of renal hemodynamics during, with and without veno-venous bypass [Veroli, Elhage, Gillon, Des-corps-Declere, Jayais, Ecoffey], A219

effect of aprotinin on fibrinolysis during [Tartiere, Deshayes, Samba, Le Querrec, Gerard], A218

graft function after, value of total body oxygen consumption as parameter of [Groh, Gerhard, Forst, Welte, Dieterich, Pratschke, Peter], A479

hormonal influences on renal function during [Roberts, Sakai, Duke, Ramsay, Whitten], A622

- implications for coagulopathy during: hepatic regulation of fibrinolysis [Kelley, Bissell], A565
- on-line assessment of liver graft function by recording neuromuscular transmission during liver transplantation in pigs [Pittet, Mentha, Schopfer, Morel, Benakis, Tassonyi], A815
- plasma laudanosine levels in patients receiving continuous atracurium infusions during [Peters, Matsumi, Lawhead, Landers, Becker, Earl], A303
- post-reperfusion syndrome in, myocardial depressant effect of plasma from: *In Vitro* study [Jayais, Chemla, Ecoffey, Descorps-Declere, Samii, Lecarpentier], A554
- rapid increase in sodium associated with CPM after [Videira, Kang, Martinez, DeWolf, Aggarwal, Gasior], A222
- reperfusion during, metabolic and ECG changes associated with [Gabrielson, Nam, Reich], A990
- reperfusion syndrome during: echocardiographic analysis of ventricular dynamics [Gabriel, Muller, Tuchy, Hackl, Zimpfer], A992
- solution for hemodynamic instability that minimizes blood transfusion requirement in [Lin, Lichtor, Emond, Broelsch], A988
- transesophageal echocardiography during [Roberts, Duke, Gottlich, Ramsay], A388
- vital organ blood flow during deliberate hypotension [Kick, van Aken, Wouters, Verbesselt, an Hemelrijck], A625
- Local anesthetics.** *See Anesthetics, local; See also under Toxicity*
- Lorazepam.** *See under Hypnotics*
- Lung.** *See also under Complications*
- acute oxygen-induced amiodarone pulmonary toxicity after general anesthesia [Duke, Ramsay, Herndon, Swygart, Cook], A228
- asthma**
- lack of bronchodilator effect of subanesthetic concentration of isoflurane in [Mercier, Benhamou, Denjean], A972
- atelectasis**
- circulatory effects of gravitational rotation in oleic acid-induced lung injury [Cope, Baisden, Fortier-Bensen, Bifano, Picone], A262
- halothane anesthesia effects on, phrenic nerve stimulation during [Hedenstierna, Tokics, Lundquist, Andersson, Strandberg, Brismar], A129
- blood flow**
- effect of almitrine on pulmonary capillary transit times [Emhardt, Hanger, Hanson, Herve, Wagner], A134
- ventilation-perfusion index can accurately reflect venous admixture in critically ill patients [Russell, Graybeal, Snider], A237
- bronchus**
- bronchodilatation by ketamine, reinvestigation of mechanism of [Ben-Harai, Bansinath], A627
- damage**
- pulmonary acid injury, effect of duration of anesthetic exposure on [Coleman, Rutter, Tait, Johnson, Knight], A998
- edema**
- circulatory effects of gravitational rotation in oleic acid-induced lung injury [Cope, Baisden, Fortier-Bensen, Bifano, Picone], A262
- formation of, eicosanoid production and, halothane-oxidant interactions in *Ex Vivo* perfused rabbit lung [Shayevitz, Johnson, Knight], A339
- effects of high dose salbutamol aerosol on lung histology in rabbits [Spahr-Schopfer, Lerman, Cutz, PEng], A980
- function**
- dynamic respiratory patterns after laparoscopic cholecystectomy [Shulman, Chuter, Weissman], A136
- effect of thoracic epidural anesthesia on pulmonary function in normals [Speight, Rauck, Mann], A729
- matching of ventilation and perfusion in normal lungs, effect of changes in P<sub>CO<sub>2</sub></sub> on [Domino, Eisenstein, Lu, Swenson, Hlastala], A128
- microsomal ethylmorphine N-demethylase activity inhibited by halothane, in rat lung [Ahmad, Kartha], A336
- in oleic acid injury, canine, hypocapnia and hypercapnia increase VA/Q heterogeneity in [Domino, Eisenstein, Lu, Hlastala], A235
- pain and pulmonary dysfunction after cholecystectomy under laparoscopy and laparotomy [Cigarini, Joris, Jacquet, Lamy], A122
- postoperative pulmonary complications after abdominal surgery: epidural analgesia using bupivacaine and opioid *versus* subcutaneous morphine [Farhat, Thomas, Rey, Bourgain, Desreunnes, Jayr], A126
- postoperative pulmonary function deterioration, prevented by laparoscopic cholecystectomy? [Reed, Han, Sampson], A127
- postoperative stress response and, after laparoscopic cholecystectomy [Rademaker, deWit, Ringers, Odoom], A123
- pulmonary complications and diaphragm function after laparoscopic cholecystectomy [Sha, Ohmura, Yamada], A255
- pulmonary excretion of acetone: conducting airways and time course [Baumgardner, Schreiner, Aukburg, Scherer, Neufeld], A135
- ventilation-perfusion index can accurately reflect venous admixture in critically ill patients [Russell, Graybeal, Snider], A237
- human, immunohistochemical location of manganese superoxide dismutase in [Noll, Coursin, Cihla], A281
- neuropeptides release from guinea-pig lung *In Vitro*, effects of capsaicin, potassium, and histamine on endotracheal pressure changes and [Hogman, Hua, Grafe, Yaksh], A631
- positive end expiratory pressure**
- effect of, on fentanyl-induced modifications of resistive properties of respiratory system [Cohendy, Lefrant, Laracine, Rebiere, Eledjam], A132
- pulmonary artery**
- effects of amrinone on, during acute and chronic pulmonary hypertension, in conscious dogs [Pribble, Nyhan, Nishiwaki, Rock, Peterson, Tong, Desai, Murray], A567
- pressures of, estimated by transesophageal echocardiography? [Muhiudeen, Oken, Kuecherer, Schiller, Cahalan], A384
- respiratory complications, risk factors for, after cardiac surgery [Higgins, Yared, Paranandi, Baldyga, Starr], A258
- respiratory distress syndrome**
- cytokine elevation in children with sepsis syndrome and [Costarino, Sullivan, Harris, Kilpatrick], A245
- necrotizing pancreatitis complicated by, release of cytokines in plasma and lymph during [Montravers, Chollet-Martin, Pasquier, Gauzit, Marmuse, Fichelle, Gougerot-Pocidallo, Desmonts], A265
- respiratory resistance**
- bronchoconstriction caused by histamine or acetylcholine, effect of sevoflurane on [Katoh, Ikeda], A973
- bronchodilatation by ketamine, reinvestigation of mechanism of [Ben-Harai, Bansinath], A627
- effect of PEEP on fentanyl-induced modifications of resistive properties of respiratory system [Cohendy, Lefrant, Laracine, Rebiere, Eledjam], A132
- pulmonary excretion of acetone: conducting airways and time course [Baumgardner, Schreiner, Aukburg, Scherer, Neufeld], A135
- shunting**
- pulmonary, increased by abdominal mesenteric traction [Seltzer, Ritter, Starsnic, Torjman, Marr, Schieren], A118



**trachea**

- acetylcholine-induced muscle contraction, cytosolic ionized calcium concentration decreased by halothane during, in dog [Jones, Housmans, Warner, Rehder], A639
- release of calcitonin gene-related peptide from, induced by electrical field stimulation, capsaicin, and potassium, in rat [Hua, Yaksh], A632
- smooth muscle, canine, effect of halothane on: role of cytosolic  $Ca^{2+}$ , cAMP and protein kinase C [Yamakage, Namiki], A354

**vasculature**

- biphasic tension response to  $K^+$ , caused by halothane, in isolated pulmonary artery [Fehr, Schuler, Rhone, Larach], A566
- catecholamines cause pulmonary hypertension but not edema in isolated pig lung [Toung, Reily, McPherson, Traystman], A1021
- effects of amrinone, during acute and chronic pulmonary hypertension, in conscious dogs [Pribble, Nyhan, Nishiwaki, Rock, Peterson, Tong, Desai, Murray], A567
- hypoxic pulmonary vasoconstriction during one-lung-ventilation, direct measurement of effects of isoflurane anesthesia on [Groh, Kuhnle, Kubler, Goetz, Peter], A341
- influence of moderate hypocapnia on pulmonary vascular tone following mitral valve replacement [Mahdi, Salem, Joseph, Paulissian, Hernandez], A166
- inhaled nitric oxide dilates human hypoxic pulmonary vasoconstriction without causing systemic vasodilation [Frostell, Blomqvist, Lundberg, Hedenstierna, Zapol], A989
- pulmonary hypertension, inhaled nitric oxide in, following mitral valve replacement [Girard, Lehot, Clerc, Ffrench, Estanove], A984

**volume**

- automated determination of, as guide for respirator adjustment during controlled mechanical ventilation [Putensen, Baum, Hormann], A1015

**Lymphocytes.** *See under Blood*

**M**

**MAC.** *See under Potency, anesthetic*

**Magnesium.** *See under Ions*

**Magnetic resonance imaging.** *See under Equipment, magnetic nuclear resonance*

**Malignant hyperthermia.** *See under Hyperthermia*

**Masks, anesthesia.** *See under Equipment*

**Measurement techniques**

**anesthetics**

- infrared monitors, adverse effect of respiratory rate on volatile anesthetic reporting in [Jameson, Popic], A418
- assessment of sympathetic function during anesthesia, new approach to [Deegan, He, Wood, Wood], A560
- automated real-time analysis of transesophageal echocardiograms [Cahalan, Ionescu, Melton], A385
- bedside PT and PTT coagulation monitor, clinical validation of [Reich, DePerio], A430
- biplane transesophageal echocardiography, comparison of mitral valve regurgitant jet areas by [Carter, Davis], A389

**blood flow**

- cerebral, during isoflurane anesthesia, monitored by transcranial Doppler sonography [Werner, Hoffman, Kochs, Schulte am Esch, Albrecht], A616
- regional myocardial, during cardiac surgery: measurement using  $Xe^{133}$  clearance with miniature epicardial detectors [Butterworth, Stump, Royster, Prielipp, Kon], A97

**blood pressure**

- central and peripheral intraarterial, in ICU patients receiving infusion of vasoconstrictive agents, comparison of [Barr, Mihm, Gaeta], A283

**breath-by-breath method for measuring respiratory quotient, validation of [Hoffman, Torres, Sportiello, Forster], A131**

**cardiac output**

- arterial pulse contour analysis trending of; hemodynamic manipulations during neurosurgery [Weissman, Ornstein, Young], A469
- from combination of arterial pressure waveform bioimpedance and vascular R-C model [Djordjevich, Ivankovich], A480
- comparison between pulse contour, Doppler, and thermal dilution [Scanlon, Smith], A466
- continuous, by pulse contour method, accuracy of, under changes in systemic vascular resistance [Specht, Apenburg, Wichmann, Reinhart], A457
- continuous, pulse contour method of, based on estimation of admittance [Graz, Kraidin, Larjani, de Castro], A454
- errors in, ventilation, thermal noise and, after cardiopulmonary bypass [Latson, Whitten, Elmore, Wiley, O'Flaherty], A478
- impedance cardiography: validity of intraoperative measurements [Perrino, O'Connor, Ariyan, Lippman], A472
- method for use during anesthesia [Clark, Lin, Jones, Koppert, Swier], A477
- room temperature *versus* iced injectate using REF-1 pulmonary artery catheter [Profeta, Roth, Wiener], A458
- thermodilution RVEF measurements consistently underestimate RV function under conditions of color-flow Doppler defined tricuspid regurgitation [Rafferty, Durkin, Hines, O'Connor], A108

witnessed right atrial injectate thermodilution right ventricular ejection fraction reproducibility correlates [Rafferty, Durkin, Hines, O'Connor], A461

comparison of thromboelastography and platelet aggregometry [Tuman, McCarthy, Patel, Patel, Ivankovich], A433

comparison of transcutaneous detection of glomerular filtration rate with inulin clearance [Bauman, Kelly, Scuderi, Lorentz, Watson], A435

dipyridamole thallium scintigraphy and gated radionuclide angiography, unreliability of, in assessment of cardiac risk before abdominal aortic surgery [Baron, Mundler, Bertrand, Vicaut, Coriat, Kieffer, Viars], A100

**Doppler ultrasound**

aeric microemboli and transcranial Doppler: episodic frequency and timing in open heart surgery [Albin, Hantler, Mitzel, Bunegin, Grover], A53

transcranial Doppler sonography monitors changes in cerebral blood flow during isoflurane anesthesia [Werner, Hoffman, Kochs, Schulte am Esch, Albrecht], A616

transtracheal, in pediatric patients, effects of growth on measurements [Saeki, Namba, Nakayama, Tokioka, Morita, Hirakawa], A459

dye, ischemic-hypoxia injury in cultured neurons and astrocytes measured by [Juurlink, Sochocka, Hertz, Shuaib, Cole], A610

**gas tension**

adaptive digital filter provides better real-time predictions of expired anesthetic gases than classic physiologic model [Gibby, Martinez], A496

bedside blood gas and electrolyte monitoring in critically ill patients [Prielipp, Zaloga, Dudas, Black], A485

effect of alcohols and acetone on 3.3NM infrared anesthetic agent monitors [Volgyesi, Crawford], A488

photoacoustic analyzer, clinical evaluation of [Abenstein, Welna], A463

sources of error in gas analysis, phase delay and frequency response as [Hoffman, Weigle], A470

**hemodynamics**

- thermodilution RVEF measurements consistently underestimate RV function under conditions of color-flow Doppler defined tricuspid regurgitation [Rafferty, Durkin, Hines, O'Connor], A108
- left ventricular performance, effects of urapidil and clonidine on [Lepage, Pinaud, Malinovsky, Cozian, Souiron], A137
- lidocaine sensitive electrode [Yokono, Yokono, Ogi, Satake, Kaneshina], A358
- metabolic breath-by-breath, methodology for *In Vitro* validation of [Weissman, Sardar, Kemper], A400
- myocardial tissue impedance to determine esmolol's effectiveness to protect against ischemia [Howie, Romaneli, Hiestand, Liu, Rezaei, McSweeney], A443
- neural network for quantification of air embolism [Fine, Orr, Westenskow, Kuck], A465
- new compact monitor, evaluation of intraoperative monitoring of prothrombin time and activated partial thromboplastin time with [Samama, Faure, Riou, Ankri, Arock, Guillosson, Viars], A438

**nuclear magnetic resonance**

- nuclear magnetic resonance evaluation of six ventilators within [Klein, Blanch], A403
- position of laryngeal mask airway as determined by [Denman, Goudsouzian, Cleveland, Shorten], A1045

**oximeters**

- hyperventilation reduces skin blood flow and transcutaneous oxygen in extremities [Barker, Hyatt, Clarke], A409
- pulse oximetry does not reduce postoperative complications: prospective study of 20,802 patients [Moller, Pedersen, Johannessen, Rasmussen, Espersen, Dyrland, Jensen, Rasmussen, Ravlo, Chraemmer-Jorgensen, Djernes, Wiberg-Jorgensen, Cooper, Gravenstein, Johansen], A867
- pulse oximetry uncovers hypoxemia and decreases incidence of evidence for myocardial ischemia during anesthesia: prospective study of 20,802 patients [Moller, Ravlo, Jensen, Rasmussen, Dyrland, Espersen, Pedersen, Rasmussen, Johannessen, Chraemmer-Jorgensen, Djernes, Wiberg-Jorgensen, Cooper, Gravenstein, Johansen], A1057
- reliability of, during laparoscopic surgery for cholecystectomy [Nyarwaya, Samii, Mazoit, De Watteville], A453
- use of pulse oximetry as predictor of post-anesthesia care unit duration in smokers and nonsmokers [Handlin, Baker], A903

- pediatric transesophageal echo: evaluation of feasibility and utility in 129 examinations [Sorensen, Stevenson], A391

**pulse monitor**

- oximetry, real and false positive alarms during pediatric anesthesia [Rolf, Cote], A476

**spectroscopy**

- near infrared reflectance, noninvasive monitoring of mixed-venous oxygen saturation in infants by [Steven, Kurth, Phoon, Nicolson, Chance], A413
- near-infrared, noninvasive measurement of brain oxygenation with, influence of tissue layers on [Snyder, Williams, Brem, Eleff, Norris, Hanley], A208
- noninvasive optical, during general anesthesia, evaluation of [Koorn, Silvay, Weiss-Bloom, Neutsein], A415
- photoacoustic; effects of anesthetic gas mixtures and of ethanol [Alphin, Guyton], A419
- thermodilution *versus* 2-D transesophageal echocardiography: right ventricular ejection fraction measurement [Koorn, Reich, Tamman, Narang, Hillel], A386
- thromboelastography, effect of delay and storage on whole blood clotting analysis as determined by [Rocke, Orlikowski, Murray], A428

**tomography**

- computerized, selective neurolysis of cranial nerve using [Jain, Alagesan, Harris, Chiang], A748
- transcranial sonography, in estimation of embolic air volume in middle cerebral artery [Bunegin, Wahl, Albin], A471
- transcutaneously detected inulin clearance and, inherent variability of, in humans [Bauman, Scuderi, Kelly, Lorentz, Watson], A484
- transesophageal echocardiography, gastroesophageal injury and [Hulyalkar, Ayd, Casella], A387

**ultrasound**

- cerebral perfusion mapping with [Rampil], A1006
- urine drug testing in anesthesia, advance for: norfentanyl is detectable in urine for 48 hours [Silverstein, Reiders, McMullin, Schulman, Zahl], A895

**Mechanical ventilation. See under Ventilation**

**Medetomidine. See under Sympathetic nervous system, alpha-adrenergic agonists**

**Medicolegal**

- anesthesia personnel, neonatal resuscitation, and courts [Heyman, Joseph, Salem, Heyman], A1074
- postoperative complications, not reduced by pulse oximetry: prospective study of 20,802 patients [Moller, Pedersen, Johannessen, Rasmussen, Espersen, Dyrland, Jensen, Rasmussen, Ravlo, Chraemmer-Jorgensen, Djernes, Wiberg-Jorgensen, Cooper, Gravenstein, Johansen], A867
- postoperative complications, when do they occur? prospective study of 20,802 patients [Johannessen, Jensen, Moller], A863
- should urinalysis be required before elective outpatient surgery? are legislators correct? [Apfelbaum, Gronert, Murray, Grogono, Thisted, Duke, Rupani, Malhotra, Coalson, Lichtor, Finn, Roizen, Graham, Kritch], A1107

**Memory**

- comparative amnesic effects of midazolam and diazepam: quantitative assessment [Parris, Schwartz, Bean, Johnson, Fraifeld], A1031
- effect of intranasal midazolam on, in pediatric patients [Twersky, Hartung, McClain, Berger, Beaton], A919
- propofol in sedative doses is amnesic agent [Veselis, Reinsel, Marino, Wronski], A1023
- retrograde amnesia, is it produced by general anesthesia in unpremedicated children? [Halpern, Lerman], A928
- therapeutic suggestions administered during general anesthesia, ineffectiveness of [Ghoneium, Block, Sum Ping, Ali], A1027

**Meperidine. See under Analgesics**

**Mepivacaine. See under Anesthetics, local**

**Mesenteric reflexes. See under Reflexes**

**Messenger hormones. See under Hormones**

**Metabolic acidosis. See under Acid—base equilibrium**

**Metabolism. See also under Brain; Cells; Heart; Liver; Muscle, skeletal**

**adenosine triphosphate**

- ATP-sensitive K<sup>+</sup> current, activation of [Deutsch, Klitzner, Weiss], A555

**diabetes**

- regional changes in cerebral endothelium-dependent vascular relaxation in, in rat [Pelligrino, Albrecht], A547
- dichloroacetate enhances myocardial recovery following global ischemia [Wahr, Childs, Olsanski, Bolling], A521
- effect of prolonged administration of sevoflurane on serum concentration of fluoride ion in patients [Kazama, Ikeda], A346

effects of impact administration on, in critically ill [Singer, Katz, Bursztein, Pollack, Kvetan, Askanazi], A270

**glucose**

- acute metabolic acidosis in fetal lamb following maternal labetalol administration [Yeleswaram, Rurak, Hall, McMorland, Axelson], A1076
- association between blood glucose level during cardiopulmonary bypass and neuropsychiatric outcome [Frasco, Croughwell, Blumenthal, Will, Leone, White, Goodman, Reves], A55
- blood glucose and electrolyte changes following perioperative use of three hydrating solutions in children [Dubois, Gouyet, Murat, Saint-Maurice], A945
- decreases potassium level in anhepatic patients [Frenette, De Wolf, Kang, Tang], A217
- diabetic patients, severity of surgery and glycemic control in [Raucoules, Lugin, Ichai, Deloffre, Grimaud], A282
- infusion, effects of, on amino-acid blood levels after minor surgery [Guidon-Attali, Latiere, Bruder, Francois], A357
- ischemia and reperfusion in newborn heart: effect of glucose [McGowan, Downing], A1046
- in nondiabetic subjects during perioperative period [Feinstein, McGill, Hirsch], A623
- preoperative blood test, use of technology to improve patient selection for [Meyer, Roizen, Murray, Gronert, Grogono, Duke, White, Thisted, Apfelbaum, Disbrow, Lichtor, Uitvlugt, Rupani, Erickson, Summerell, Schmittner, Texidor], A441

**hyperglycemia**

following induction with thiopental in healthy women [Amar, Shamoon, Lazar, Salama, Frishman], A206

**hypoglycemia**

- hypercapnic cerebral blood flow reactivity blunted by, in piglets [Jacques, Kirsch, Traystman], A545
- hypoxia *versus*, role of adenosine in CBF increases during, in rat [Pelligrino, Albrecht, Hoffman], A546
- inorganic fluoride production following sevoflurane in healthy surgical patients [Morgan, Frink, Ghantous, Gandolfi, Brown], A349

**insulin**

- decreases potassium level in anhepatic patients [Frenette, De Wolf, Kang, Tang], A217
- insulin response during regional anesthesia in children [Gouyet, Dubois, Murat, Saint-Maurice], A944

**lactate**

acute metabolic acidosis in fetal lamb following maternal labetalol administration [Yeleswaram, Rurak, Hall, McMorland, Axelson], A1076

**lipid**

- excessive acylation of triglycerides in muscle from swine exhibiting clinical malignant hyperthermia: evidence of heterogeneity in pathogenesis of MH [Fletcher, Erwin, Tripolitis, Yudkowsky, Rosenberg], A298
- fatty acids markedly lower threshold for halothane-induced Ca<sup>2+</sup> release from terminal cisternae: implications for malignant hyperthermia [Fletcher, Mayerberger, Tripolitis, Yudkowsky, Rosenberg], A297
- inhibition of brown fat heat production by inhalation anesthetic agents [Ohlsson, Lindahl, Mohell, Cannon, Nedergaard], A340

**oxygen consumption**

- clonidine prevents postoperative increase in VO<sub>2</sub> Delaunay, Bonnet, Liu, Duvaldestin], A981
- metabolic effects of corrective operations in infants and children with congenital heart defects [Puhakka, Rasanen, Leijala, Peltola], A965
- metabolic monitoring of early repayment phase following aortic unclamping: comparison of patients with abdominal aortic aneurysm and vascular occlusive disease [Roberts, Cohen, Perkins, Robbiano, Shah], A149

relationship between oxygen delivery and, during and following cardiopulmonary bypass [Abrante, Sheikh, Perkins, Raghavan, Samuel, Lumb, Cohen], A66

**protein**

- alanine turnover, effect of exogenous epinephrine on [Trager, Ensinger, Anhaupl, Georgieff, Rugheimer], A274
  - amino-acid blood levels after minor surgery, effects of glucose infusion on [Guidon-Attali, Latiere, Bruder, Francois], A357
  - catabolism, urea and total urinary nitrogen as measures of [Hyman, Naukam, Flakoll], A264
- respiratory quotient**
- measurement of, validation of breath-by-breath method for [Hoffman, Torres, Sportiello, Forster], A131
  - response to chest physical therapy: stressing critically ill patient [Weissman, Kemper], A238
- serum and urinary inorganic fluoride levels after prolonged inhalation of sevoflurane in man [Kobayashi, Ochiai, Takeda, Sekiguchi, Fukushima], A348
- serum inorganic fluoride after extended exposure to sevoflurane [Toriumi, Ozaki, Yasuda, Tanifuji, Amaki], A347

**Methodone.** *See under Analgesics*

**Methohexital.** *See under Anesthetics, intravenous*

**Methoxyflurane.** *See under Anesthetics, volatile*

**Methylparaben.** *See under Pharmacology*

**Methylnaltrexone.** *See under Antagonists, narcotic*

**Metoclopramide.** *See under Pharmacology*

**Metocurine.** *See under Neuromuscular relaxants*

**Meyer-Overton rule.** *See under Theories of anesthetic action*

**Midazolam.** *See also under Anesthetics, intravenous*

Hypnotics response of human CNS sodium channels to [Frenkel, Urban], A646

**Milrinone.** *See under Pharmacology*

**Mitral valve.** *See under Heart*

**Mivacurium.** *See under Neuromuscular relaxants*

**MK-801.** *See under Pharmacology*

**Monitoring.** *See also under Blood pressure; Carbon dioxide; Oxygen; Temperature*

**blood pressure**

arterial, noninvasive continuous monitoring of, using bioimpedance [Djordjevic, Ivankovich], A1012

**carbon dioxide**

capnography: new CO<sub>2</sub> sampling nasal cannula [Roth, Wiener, Barth, Profeta], A481

real and false positive capnography alarms during pediatric anesthesia [Rolf, Cote], A476

**electrocardiography**

preoperative, use of technology to improve patient selection for [Meyer, Roizen, Murray, Gronert, Grogono, Duke, White, Thisted, Apfelbaum, Disbrow, Lichtor, Uitvlugt, Rupani, Erickson, Summerell, Schmittner, Texidor], A441

**neuromuscular function**

dual innervation of hand muscles potential influence on [Halevy, Brull, Booke, Garcia, Silverman], A814

on-line assessment of liver graft function by recording neuromuscular transmission during liver transplantation in pigs [Pittet, Mentha, Schopfer, Morel, Benakis, Tassonyi], A815

with submaximal stimulation of nerve [Storella, Simpson, Hill], A812

train-of-four hysteresis during computer-assisted continuous infusion of vecuronium [Epstein, Bartkowski, Wilkerson, Lessin, Marr], A817

of orbicularis oculi is accurate indicator of vocal cords relaxation in atracurium-induced neuromuscular blockade [Ungureanu, Meistelman, Frossard, Donati], A797

**oxygen**  
 continuous arterial PaCO<sub>2</sub> measurement, performance of luminescent sensor for [Biondi, Friedman], A404  
 oxygenation: new CO<sub>2</sub> sampling nasal cannula [Roth, Wiener, Barth, Profeta], A481  
 real and false positive pulse oximetry alarms during pediatric anesthesia [Rolf, Cote], A476

**pressure**  
 fast flush technique does measure dynamic frequency response of entire monitoring system [Kleinman, Powell, Kumar, Gardner], A452

**ventilation**  
 breath-by-breath metabolic measurements, methodology for *In Vitro* validation of [Weissman, Sardar, Kemper], A400  
 noninvasive respiratory, *In Vitro* and *In Vivo* evaluation of [Cigada, Sebastianelli, Fordyce, Camporesi], A398

**Morbidity. See under Complications**

**Morphine. See under Analgesics**

**Muscle, skeletal**  
**contractility**  
 concentration-dependent tetanic contraction induced by subarachnoid disodium EDTA: prevention by CaCl<sub>2</sub> pretreatment [Wang, Li, Hiller, Simon, Budzilovich], A651  
 ryanodine contractures in malignant hyperthermia, diagnostic evaluation of [Nelson], A302

**diaphragm**  
 differential sensitivity to halothane anesthesia of genioglossus, intercostals and: comparison between kittens and adult cats [Ochiai, Guthrie, Motoyama], A925  
 function of, pulmonary complications and, after laparoscopic cholecystectomy [Sha, Ohmura, Yamada], A255  
 human, neuromuscular blocking effect of ORG 9426 on [Cantineau, Porte, Homs, Liu, Duvaldestin], A785  
 limit of activation of, during resistive breathing [Goldman, Walsh, Romano, Comtois, Grassino], A124  
 muscle relaxant effects in thumb, larynx, and diaphragm: novel pharmacodynamic analysis [Bragg, Fisher, Donati, Meistelman, Sheiner], A799

**metabolism**  
 altered, in humans diagnosed as malignant hyperthermia susceptible [Fletcher, Jiang, Gong, Rosenberg], A638  
 inositol triphosphate and malignant hyperthermia in human skeletal muscle [Scholz, Hartung, Troll, Patten, Schulte am Esch], A641  
 systemic oxygen uptake dependency on oxygen delivery with dobutamine and enoximone administration not explained by [Francois, Mebazaa, Mateo, Lucas, Payen], A257

**myoglobin**  
 myoglobinemia induced by succinylcholine, effectively reduced by ketamine [Noguchi, Amamiya, Andou, Saikawa], A299

**Myasthenia gravis. See under Complications**

**Myocardial blood flow. See under Heart**

**Myocardial function. See under Heart**

**Myocardial infarction. See under Complications; Heart**

**Myoglobin. See under Muscle, Skeletal**

N

**Nalbuphine. See under Analgesics; Antagonists, narcotic; Pharmacology**

**Nalmefene. See under Antagonists, narcotic**

**Naloxone. See under Antagonists, narcotic**

**Nausea. See under Vomiting**

**Nedocromil. See under Pharmacology**

**Neostigmine. See under Antagonists, neuromuscular relaxants**

**Nerve**

A $\delta$  and C fiber endings, injury-induced responses of [MacIver, Tanelian], A598

**block**  
 brachial plexus, adding fentanyl and clonidine to mepivacaine results in rapid onset and prolonged anesthesia and analgesia after [Singelyn, Muller, Gouverneur], A653  
 digital, for pulse oximetry failure [Grayson, Bourke], A407  
 intrapatellar, for chronic pain following diagnostic knee arthroscopy [Trankina], A738  
 laryngeal, superior, for laryngoscopy and intubation [Taniguchi, Fukunaga, Harano, Totoki, Takasaki], A81  
 local anesthetic, effects of verapamil on [Cohn, Laurito], A688  
 prolonged sciatic, with bupivacaine using biodegradable polymer matrix, biochemical and histologic effects of [Masters, Berde, Ward, Martyn, Kupsky], A680  
 prolonged sciatic nerve blockade, using sustained release of bupivacaine from biodegradable polymer matrix [Masters, Berde, Dutta, Langer], A765  
 sensory and motor, of rat sciatic nerve *In Vivo* produced by Na<sup>+</sup> channel activator veratridine [Strichartz, Drachman, Latka, Feldman], A771  
 tonic nerve ending discharge *versus* axonal conduction, differential effects of lidocaine on [Tanelian, MacIver], A683  
 C-fiber action potential, effects of clonidine on, interaction with lidocaine [Gaumann, Brunet, Jirounek, Morel, Volet], A656

cranial, IX and X: anatomic study [Woods, Lee, Reikersdorfer, Lander], A742

**damage (postoperative)**  
 peripheral nerve palsies and pancreatic surgery: preliminary appraisal [Viel, Joubert, de la Coussaye, Cohendy, Saissi, Pellissier, Eledjam], A1061  
 intracellular pH in C fibers, halothane inhibits regulation of [Kracke, Mills, Drake], A597  
 ketamine neurotoxicity, chlorbutanol is responsible for, in rabbits [Malinovsky, Lepage, Mussini, Cozian, Pinaud], A650  
 neurolysis of cranial nerve, selective, using computerized tomography [Jain, Alagesan, Harris, Chiang], A748  
 peripheral, human, opioid peptides in [Brooks, Rattan, Gupta, Tejwani], A591  
 sciatic nerve ligation increases mRNA coding for substance P and dynorphin in spinal cord, in rat [Carpenter, Nepom, Yaksh, Yamamoto], A1089  
 sodium channels derived from muscle and, differential effects of pentobarbital on [Wartenberg, Wange, Urban, Duch], A1036

**Neurolept analgesia. See under Anesthetic techniques**

**Neuromuscular function. See also under Monitoring**  
 potentiation of neuromuscular blockade by cyclosporine not mediated by pre or postsynaptic membrane effects [Sharpe, Gelb, Brown, Veitch, Henderson], A791  
 refractoriness of neuromuscular transmission, computer-aided assessment of [Lee, Tsai, Lin], A805  
 secondary neuromuscular blockade, may be induced by autologous blood transfusion [Montefiore, Boico, Deghani, Bonnet, Zetlaoui], A795  
 twitch response of rabbit tibialis anterior muscle, effect of temperature on [Fauvel, Feldman], A809

**Neuromuscular relaxants**  
**atracurium**  
 airway constriction following, is due to histamine release [Mehr, Lindeman, Hirshman], A974  
 continuous infusion of, during orthotopic liver transplantation, plasma laudanidine levels in [Peters, Matsumi, Lawhead, Landers, Becker, Earl], A303

- developmental toxicity of non-depolarizing muscle relaxants in cultured rat embryos [Fujinaga, Baden, Mazze], A850
- double-burst characteristics of, in children [Crawford, Bissonnette], A811
- effect of, on sympathetic nerve activity [Yoneda, Nishizawa, Benson, Goto, Arakawa], A780
- effects of, on elevated intracranial pressure during routine endotracheal suction [Klezl, Werba, Illievich, Schramm, Spiss], A211
- evaluation of proconvulsant effect of laudanone in renal transplant recipient [Lepage, Athouel, Vecherini, Malinovsky, Cozian], A781
- histamine release following, in elderly [Shorten, Goudsouzian, Ali], A782
- inhibition of hepatic microsomal drug metabolism by [Bohrer, Schmidt, Augenstein, Bach, Martin], A356
- iontophoretic study of speed of action of [Law Min, Bekavac, Glavinovic, Donati, Bevan], A810
- and metabolites in isolated perfused rat liver: biochemical and morphological observations [Reckendorfer, Burgmann, Sperlich, Tuchy, Schwarz], A304
- neuromuscular blockade induced by, monitoring orbicularis oculi is accurate indicator of vocal cords relaxation in [Ungureanu, Meistelman, Frossard, Donati], A797
- optimizing dosing of, to allow for variation in body somatotype [Beemer, Bjorksten, Crankshaw], A778
- paralysis induced by, succinylcholine enhances recovery from [Huang, Simpson], A783
- resistance to, in muscles under thermally-injured skin in rat [Pavlin, Howard, Slattery], A779
- vecuronium *versus*, comparison of effects of: outpatient anesthesia [Zahl, Wetchler, Kallar, Bogetz], A1106
- doxacurium**
- iontophoretic study of speed of action of [Law Min, Bekavac, Glavinovic, Donati, Bevan], A810
- gallamine**
- iontophoretic study of speed of action of [Law Min, Bekavac, Glavinovic, Donati, Bevan], A810
- metocurine**
- decreased sensitivity to, during chronic phenytoin may be due to protein binding and receptor changes [Martyn, Kim], A640
- elimination of, by hemofiltration in patients undergoing cardiopulmonary bypass [Hogue, Itani, Martyn], A801
- mivacurium**
- autonomic and neuromuscular effects of, in cats [Maehr, Blemont, Wray, Savarese, Wastila], A772
- comparative pharmacology of, in cats [Belmont, Wray, Maehr, Savarese, Wastila], A773
- dose-response relationship of, in infants during nitrous oxide-halothane anesthesia [Woelfel, Bandom, McGowan, Cook], A775
- neuromuscular block induced by, duration of action of, in patients homozygous for atypical plasma cholinesterase gene [Ostergaard, Jensen, Jensen, Viby Mogensen], A774
- pharmacokinetics of two isomers of, in cat [Wray, Belmont, Maehr, Welch, Wastila], A305
- ORG 9426**
- administration of, using new radioimmunoassay, evaluation of histamine release following [Davis, Szlam, Lowdon, Levy], A818
- comparison of onset and recovery of neuromuscular block after vecuronium and [Bartkowski, Witkowski, Azad, Marr, Lesin], A1071
- dose response of, in children anesthetized with halothane [Bikhazi, Marin, Mouhanna, Halliday, Foldes], A1067
- dose-response relationship of, during halothane, isoflurane, enflurane, and intravenous anesthesia [Oris, Vandermeersch, van Aken, Crul], A1063
- evaluation of cumulative properties of [Khuenl-Brady, Puh-ringer, Koller, Mitterschiffthaler], A1064
- increase of dose shortens onset time [Mayer, Doenicke, Angster, Hoffman, Peter], A1070
- infusion requirements in children during halothane anesthesia [Bandom, Woelfel, Sarner, Cook], A1072
- infusion requirements of, in patients receiving balanced, enflurane, or isoflurane anesthesia [Shanks, Fragen, Ling, Pemberton, Dunn, Howard], A1068
- intubation conditions and time-course of action of [Vandenbrom, Wierda, Huizinga, Hennis], A788
- neuromuscular and cardiovascular properties of [Mellinghoff, Diefenbach, Buzello], A807
- neuromuscular blockade at adductor muscles of larynx and adductor pollicis in man [Plaud, Meistelman, Donati], A784
- neuromuscular blockade following, in children during N<sub>2</sub>O-halothane anesthesia [O'Kelly, Frossard, Meistelman, Ecoffey], A787
- neuromuscular blocking effect of, on human diaphragm [Cantineau, Porte, Homs, Liu, Duvaldestin], A785
- onset, intubating conditions, and clinical duration [Tulloch, Wilks, Bandom, Cook], A789
- pharmacokinetics and pharmacodynamics of, in elderly surgical patients [Matteo, Ornstein, Schwartz, Stone, Ostap-kovich, Spencer, Dee], A1065
- pre- and postsynaptic effects of, during onset of and recovery from neuromuscular blockade [Watanabe, Chen, Ohta, Nagashima, Foldes], A798
- protein binding of, and inhibitory effect on human cholinesterase [Chaudhry, Foldes, Ohta, Nagashima], A786
- used for endotracheal intubation: comparison with succinyl-choline [Dubois, Shearrow, Tran, Kataria, Rever, Gadde, Lea], A1066
- pancuronium**
- developmental toxicity of non-depolarizing muscle relaxants in cultured rat embryos [Fujinaga, Baden, Mazze], A850
- double-burst characteristics of, in children [Crawford, Bissonnette], A811
- EEG effect of isoflurane potentiated by, in dogs [Schwartz, Navedo, Berman], A792
- pipecuronium**
- accelerated recovery from, in neurosurgical patients treated with chronic carbamazepine therapy [Modica, Tempelhoff, Jellish, Williams], A187
- interaction of antibiotics on neuromuscular blockade induced by [de Gouw, Crul, Vandermeersch, Mulier, van Aken], A776
- pharmacokinetics of, in infants, children, and adults [Tassonyi, Pittet, Schopfer, Gemperle, Rouge, Morel], A777
- practice patterns of anesthesia intensivists in use of, national survey on [Klessig, Geiger, Murray, Cousins], A290
- rocuronium**
- pharmacokinetics, onset, and duration of action of, in humans: normal *versus* hepatic dysfunction [Magorian, Wood, Caldwell, Szenohradszky, Segredo, Sharma, Gruenke, Miller], A1069
- succinylcholine**
- dose-response in hyperparathyroidism [Roland, Villiers, Le-queueau, Roupie, Sarfate, Eurin], A808
- effect of, on intracranial pressure, cerebral blood flow velocity and electroencephalogram in patients with neurologic disorders [Kovarik, Lam, Slee, Mathisen], A207
- effect of, on intraocular pressure, in human eye with extraocular muscles detached [Kelly, Dinner, Turner, Abramson, Haik, Daines], A804
- effect of hypercapnia, hypertension and, in experimental osteofascial compartment syndrome [Varlotta, DiPasquale], A816

enhances recovery from atracurium-induced paralysis [Huang, Simpson], A783  
 increases PETCO<sub>2</sub> in dose dependent manner [van der Spek], A300  
 myoglobinemia induced by, effectively reduced by ketamine [Noguchi, Amamiya, Andou, Sankawa], A299  
 used for endotracheal intubation: comparison with ORG 9426 [Dubois, Shearrow, Tran, Kataria, Rever, Gadde, Lea], A1066

**d-tubocurarine**  
 developmental toxicity of non-depolarizing muscle relaxants in cultured rat embryos [Fujinaga, Baden, Mazze], A850  
 iontophoretic study of speed of action of [Law Min, Bekavac, Glavinovic, Donati, Bevan], A810  
 neuromuscular blockade induced by, electrophysiological study on antagonism of, by edrophonium and neostigmine [Narimatsu, Ohta, Iwasaki, Namiki], A796  
 post-tetanic events in absence and presence of, in man [Stanec, Badach, Fernandez, Winikoff, Umanoff], A806

**vecuronium**  
 antagonism of, by one of its metabolites *In Vitro* [Khuenl-Brady, Mair, Koller], A800  
 atracurium *versus*, comparison of effects of: outpatient anesthesia [Zahl, Wetchler, Kallar, Bogetz], A1106  
 comparison of onset and recovery of neuromuscular block after ORG 9426 and [Bartkowski, Witkowski, Azad, Marr, Lesin], A1071  
 computer-assisted continuous infusion of, train-of-four hysteresis during [Epstein, Bartkowski, Wilkerson, Lessin, Marr], A817  
 demand controlled infusion of [Gilly, Andel, Lackner, Sauberer, Foldes], A1009  
 developmental toxicity of non-depolarizing muscle relaxants in cultured rat embryos [Fujinaga, Baden, Mazze], A850  
 double-burst characteristics of, in children [Crawford, Bissonnette], A811  
 infusion, reduction in dose requirements by nicardipine in humans [Sumikawa, Kawabata, Kamibayashi, Kita, Yoshiya], A793  
 kinetic and dynamic parameters of, influence of blood sampling schedule on [Ducharme, Varin, Theoret, Bevan, Donati], A803  
 muscle relaxant effects in thumb, larynx, and diaphragm: novel pharmacodynamic analysis [Bragg, Fisher, Donati, Meistelman, Sheiner], A799  
 neuromuscular block, do antiarrhythmic doses of magnesium potentiate it? [Butterworth, Frawley, Dudas, Cole], A802  
 neuromuscular block, high-dose regimen of triamcinolone induces resistance to, in cats [Baker], A790  
 optimal dose and priming interval, in children [Woloszczuk-Gebicka, Forestner, Furman], A951  
 twitch depression induced by, effects of dexmedetomidine on, in rat model [Henry, Weinger, Partridge], A794  
 versatile computer-controlled closed-loop system for continuous infusion of [Assef, Jones, Lennon, Burke, Behrens], A467

**Neurosurgical anesthesia. See under Anesthesia**  
**Nicardipine. See under Pharmacology**  
**Nicotinic receptors. See under Parasympathetic nervous system**  
**Nimodipine. See under Pharmacology**  
**Nitroglycerin. See under Heart**  
**Nitroprusside. See under Pharmacology**  
**Nitrous oxide. See under Anesthetics, gases**  
**Norepinephrine. See under Pharmacology; Sympathetic nervous system**  
**Nuclear magnetic resonance. See under Measurement techniques**  
**Nurse anesthetists. See under Personnel**

O

**Obstetric anesthesia. See under Anesthesia**  
**Ondansetron. See under Pharmacology**  
**Operating rooms**  
 DNR orders in: survey of anesthesiologists' opinions and concerns [Boyd, Boudreaux], A900  
 does regional anesthesia significantly delay surgery? retrospective study [Nichols, Nagel, Gantt], A884  
 personnel, reduced exposure to halothane and nitrous oxide by, during induction of anesthesia in children using double mask system [Weber, Unterberger, Gangoly], A927  
 U.S. Anesthesiology Department Policies, study of: do not resuscitate orders in presurgical patient [Rothenberg, Franklin, Ivankovich, McCarthy], A907

**Ophthalmologic anesthesia. See under Anesthesia**  
**ORG 9426. See under Neuromuscular relaxants**  
**Organ transplantation. See under specific organs; Surgery**  
**Orthopedic anesthesia. See under Anesthesia**  
**Otolaryngologic anesthesia. See under Anesthesia**  
**Outpatient anesthesia. See under Anesthesia**  
**Oximeters. See under Measurement techniques**  
**Oxygen. See also under Monitoring**  
**blood levels**  
 relationship between oxygen delivery and mixed venous oxygen saturation during septic shock [Levraut, Jambou, Kaidomar, Grimaud], A234

**consumption**  
 continuous measurement of oxygen supply and, first data on new monitoring concept [Specht, Wichmann, Apenburg, Johnson, Reinhart], A456  
 estimation of O<sub>2</sub> deficit and debt resulting from abdominal aortic crossclamping in humans [Perkins, Roberts, Shah, Feustel, Cohen], A113  
 improvement of, by pentoxifylline in patients with septic shock [Steltzer, Mayer, Weinstabl, Oismuller, Hammerle], A231  
 measurement of, by indirect calorimetry during continuous breathing circuit flow [Rasanen], A410  
 oxygen delivery and, in brain dead patients [Mateo, Langeron, Pansard, Arthaud, Cohen, Viars], A259  
 supply-dependent, mixed venous oxyhemoglobin saturation and, during isovolemic hemodilution in pigs [Rasanen], A260  
 systemic oxygen uptake dependency on oxygen delivery with dobutamine and enoximone administration not explained by skeletal muscle metabolism [Francois, Mebazaa, Mateo, Lucas, Payen], A257  
 uptake, hemodynamics and, below and above occlusion of thoracic aorta in dogs: effects of dexmedetomidine [Gelman, Gregoretti, Henderson, Parks], A575

**delivery systems**  
 non-linear closed-loop controller for oxygenation based on clinically proven fifth dimensional quality surface [East, Tolle, McJames, Farrell, Brunner], A468  
 peritoneum as another route of, to blood [Siriwardhana, Newfield, Lipton, Giesecke], A226  
 prolonged apneic oxygenation, changes in systemic and pulmonary hemodynamics and acid—base balance during [Ikdea, Schweiss], A1117

**measurement**  
 anesthesia, not paralysis, increases mixed venous O<sub>2</sub> [Colonna-Romano, Horrow, Baker], A162

**monitoring**  
 continuous, of hepatic venous saturation, predicts postoperative liver dysfunction [Nakashima, Kainuma, Sakuma, Kawase, Shimada], A414

- continuous measurement of oxygen supply and oxygen consumption, first data on new monitoring concept [Specht, Wichmann, Apenburg, Johnson, Reinhart], A456
- estimation of O<sub>2</sub> deficit and debt resulting from abdominal aortic crossclamping in humans [Perkins, Roberts, Shah, Feustel, Cohen], A113
- by indirect calorimetry during continuous breathing circuit flow [Rasanen], A410
- pulse oximetry, does skin pigmentation affect accuracy of? *In Vitro* study [Volgyesi, Peng, Spahr-Schopfer], A406
- pulse oximetry failure, digital block for [Grayson, Bourke], A407
- simultaneous in-vivo comparison of 2- versus 3-wavelength mixed venous oximetry catheters [Leighton, Liu, Lee, Klein, Bongard], A408
- telemetric pulse oximetry network, effects of default alarm limit settings on alarm distribution in, in ward setting [Pan, James], A405
- venous oxygen saturation: central venous or pulmonary artery catheter? [Auffray, Martin, Prima, Papazian, Gouin], A455
- In Vitro* calibration of continuous mixed venous oxygen saturation pulmonary artery catheter during cardiac surgery, accuracy of [Stensrud, Van Beck, de Castro, Sharp, Abenstein], A464
- tension**
- high and low, mechanism of inhibition of EDRF synthase activity by [Johns, Rengasamy], A538
- is supplemental O<sub>2</sub> beneficial to premedicated patients prior to CABG surgery? [Kavanagh, Cheng, Sandler, Lawson, Chung], A104
- tissue**
- improvement of, by pentoxifylline in patients with septic shock [Steltzer, Mayer, Weinstabl, Oismuller, Hammerle], A231
- total and splanchnic O<sub>2</sub> deliveries, discrepancy between, during dobutamine, dopamine, and norepinephrine [Noldge, Priebe, Armbruster, Muller, Haberstroh, Geiger], A556
- toxicity**
- acute amiodarone pulmonary, after general anesthesia [Duke, Ramsay, Herndon, Swygert, Cook], A228
- transport**
- to blood, peritoneum as another route of [Siriwardhana, Newfield, Lipton, Giesecke], A226
- Oxygen consumption. See under Brain; Liver; Metabolism**
- Oxygenation. See under Brain**

P

**Pacemaker. See under Equipment**

**Pain**

**algometer**

concurrent validation of objective pain scale for infants and children [Norden, Hannallah, Getson, O'Donnell, Kelliher, Walker], A934

antinociceptive effect of spinally administered  $\alpha 2$  agonists, pharmacology of [Takano, Yaksh], A630

antinociceptive effects of intrathecal 3 $\alpha$ -hydroxy-5 $\alpha$ -pregnan-20-one in rat mechanical visceral pain model [Colburn, Winfree, Coombs, Deleo, Twitchell], A594

cancer, control of, trial of thorex implantable pump delivered intrathecal MS in [Coombs, Saunders, Maurer, Vernier, Ahles], A741

**chronic**

back, intractable, treatment of, with injection of 10% butamben suspension [Shulman, Ivankovich, Braverman, Lubenow], A739

intrapatellar nerve block for, following diagnostic knee arthroscopy [Trankina], A738

is postthoracotomy pain syndrome affected by postoperative pain relieving technique? [Miguel, Hubbell], A763

long-term methadone therapy for [Wan Lu, Urban, France], A719

effects of topical colchicine and spinal capsaicin on thermal hyperesthesia in compression mononeuropathy model [Yamamoto, Yaksh], A599

induced by intradermal bradykinin, in humans [Manning, Raja, Meyuer, Campbell], A699

management of, special qualifications for anesthesiologist in [Korevaar, Arbittier], A764

**measurement**

concurrent validation of objective pain scale for infants and children [Norden, Hannallah, Getson, O'Donnell, Kelliher, Walker], A934

neuropathic, altered neuropeptide expression in rat model of [Marchand, Wurm, Kato, Kream], A592

pelvic, due to cancer, caudal steroids for treatment of [Maytorena, Sierra, Prihoda, Hoffman, Tingle], A727

**postoperative**

impact of vomiting and, postoperative mood assessment in surgical outpatients [Young, Kitz, Conahan, Aukburg, Lecky], A5

objective index of, in infants: EEG spectral activity [Meyer, Jayais, Bensouda, Mayer, Barrier], A1026

phantom sensation and pain in pediatric amputees, incidence of [Krane, Heller, Pomietto], A691

pulmonary dysfunction and, after cholecystectomy under laparoscopy and laparotomy [Cigarini, Joris, Jacquet, Lamy], A122

spinal and systemic antinociceptive actions of CP96345, non-peptidic substance P antagonist, in rat [Yamamoto, Yaksh], A593

**Pancuronium. See under Neuromuscular relaxants**

**Papaverine. See under Pharmacology**

**Parasympathetic nervous system**

airway reactivity and neuronal M2 muscarinic receptors [Okamlami, Hirshman, Fryer], A978

altered  $\beta$ -adrenergic cholinergic interaction in airways of basenji-greyhound dogs [Curry, Emala, Black, Hirshman], A976

autonomic nervous system function, continuous measurement of pupillary area fluctuations as marker of [Kimura, Komatsu, Shimada], A1003

does intrathecal clonidine release acetylcholine? [Tong, Eisenach, Shea, Bucklin, Limauro], A658

ganglia, synaptic transmission in, mechanism of action of local anesthetics on [Tabatabai, Booth], A600

**glycopyrrolate**

pharmacokinetics of, in children [Kanto, Rautakorpi, Ali-Melkkila, Iisalo, Kaila], A353

nicotinic mechanism may underlie antiemetic properties of phenothiazines [Dodson, Braswell], A636

**receptors**

nicotinic receptor ion channel, amobarbital and procaine have different effects on [Yost, Dodson], A1035

*In Vivo* block of muscarinic receptors with derivatives of tropacocaine [Cyermek, Wilde, Nguyen, Lee], A633

**Pediatric anesthesia. See under Anesthesia**

**Pentobarbital. See under Anesthetics, intravenous; Hypnotics**

**Pentoxifylline. See under Pharmacology**

**Peridural catheters. See under Equipment, catheters**

**Peridural space. See under Anatomy**

**Personnel**

anesthesia crisis resource management training [Gaba, Howard, Fish, Yang, Sarnquist], A1062

**anesthesiologists**

is there relationship between controlled substance accountability and controlled substance abuse? [Klein, Stevens, Kingston], A881

**nurse anesthetists**

is there relationship between controlled substance accountability and controlled substance abuse? [Klein, Stevens, Kingston], A881

**residents**

is there relationship between controlled substance accountability and controlled substance abuse? [Klein, Stevens, Kingston], A881

**pH. See under Acid—base equilibrium****Pharmacodynamics**

aberrant drug responses, better differentiation of, permitted by identification of DNA mutations responsible for serum butyrylcholinesterase variants [La Du, Primo-Parmo, van der Spek], A372

of alfentanil, influence of Crohn's disease on [Gesink-van der Veer, Burm, Vletter], A327

influence of pharmacokinetic variability on pharmacologic response [Williams, Smith, Jacobs], A48

muscle relaxant effects in thumb, larynx, and diaphragm [Bragg, Fisher, Donati, Meistelman, Sheiner], A799

vecuronium parameters, influence of blood sampling schedule on [Ducharme, Varin, Theoret, Bevan, Donati], A803

**Pharmacokinetics**

alfentanil, gastric fluid concentrations of, following infusion of [Prasloski, Parsons], A318

of alfentanil, influence of Crohn's disease on [Gesink-van der Veer, Burm, Vletter], A327

of alfentanil administered by multiple bolus and continuous infusion in presence of either nitrous oxide or propofol [Avram, Sanghvi, Henthorn, Fragen, Asada, Pemberton, Correll, Minieka], A320

comparison of G187084B, novel ultra-short acting opioid, and alfentanil [Hermann, Marton, Donn, Grosse, Hardman, Kamiyama, Glass], A379

computer-controlled propofol infusion: comparison of three models [Viviani, Guidon-Attali, Lacarelle, Borsarelli, Francois], A313

of dexmedetomidine, intrathecal, epidural, and intravenous [Bucklin, Eisenach, Tucker], A662

**effects**

of disease on protein binding [Stiller, Davis, Cook, McGowan], A963

of fentanyl, in congestive heart failure [Norgaard, Pineda, McGlinch, Zimmerman, Estrin], A325

of glycopyrrolate in children [Kanto, Rautakorpi, Ali-Melkkila, Iisalo, Kaila], A353

**influence**

of pharmacokinetic variability on pharmacologic response [Williams, Smith, Jacobs], A48

of interpleural bupivacaine in plasma and lung lymph [Suresh, Johnston, Traber, Traber, Arens], A756

of intranasal and intravenous midazolam in young children [Delaunay, Murat, Rey, Pons, Saint-Maurice], A923

of intranasal midazolam: influence of cimetidine [Servin, Laxenaire, Samain, Farinotti, Desmots], A352

of intranasal phenylephrine in children, clinical effects of [Christensen, Armstead, Bilyu, Johnson, Friesen], A967

of IV dexmedetomidine in adults [Dyck, Maze, Shafer], A310

of ketamine, in children [Malinovsky, Servin, Lepage, Cozian, Pinaud], A351

of methylnaltrexone, new opioid antagonist [Foss, Roizen, Moss, Murphy], A360

midazolam infusion for conscious sedation following abdominal aortic surgery [Miller, Martineau, Dean, Vallee, LeBel], A271

of ORG 9426 in elderly surgical patients [Matteo, Ornstein, Schwartz, Stone, Ostapovich, Spencer, Dee], A1065

of pipecuronium in infants, children, and adults [Tassonyi, Pitet, Schopfer, Gemperle, Rouge, Morel], A777

prediction, rate of infusion of propofol for constant concentration differs from [Crankshaw, Morgan, Dawson], A312

**prediction**

of plasma concentrations during alfentanil infusion in volunteers: accuracy of different models [Barvais, Cantraine, d'Hollander, Coussaert], A319

of propofol sedation [Monk, Ding, Smith, White], A314

of propofol *versus* age [Dyck, Varvel, Hung, Shafer], A315

of rocuronium, in humans: normal *versus* hepatic dysfunction [Magorian, Wood, Caldwell, Szenohradszky, Segredo, Sharma, Gruenke, Miller], A1069

of ropivacaine and bupivacaine in pregnant ewes [Wlody, Santos, Arthur, Pedersen, Morishima, Finster, Covino], A829

sufentanil *versus* fentanyl: comparison during and after infusion for neurosurgical anesthesia [Artru, Levron, Charlot, Le Moing, Chacornac], A324

thiopental dose requirement and distribution, altered by dexmedetomidine [Mappes, Buhner, Lauder, Stanski, Maitre], A306

of transdermal fentanyl, aging and [Esteve, Levron, Flaisler, Schoefler, Duvaldestin, Chauvin], A705

of two isomers of mivacurium, in cat [Wray, Belmont, Maehr, Welch, Wastila], A305

vecuronium parameters, influence of blood sampling schedule on [Ducharme, Varin, Theoret, Bevan, Donati], A803

**Pharmacology. See also under Sympathetic nervous system****adenosine**

hypotension induced by, cerebral blood flow during, in human [Lam], A173

inhibits oxygen free radical production of human polymorphonuclear leukocytes by action as calcium antagonist [Thiel, Bardenheuer], A1016

potentiation of, by pentoxifylline in inhibition of superoxide anion production of human polymorphonuclear leukocytes [Thiel, Becker, Bardenheuer], A230

**albumin**

negative inotropic effect of, assessment of [Journois, Safran, Dru], A164

**almitrine**

effect of, on pulmonary capillary transit times [Emhardt, Hanger, Hanson, Herve, Wagner], A134

**amiodarone**

acute pulmonary toxicity, oxygen-induced, after general anesthesia [Duke, Ramsay, Herndon, Swygert, Cook], A228

**amrinone**

in children after Fontan procedure for repair of complex cyanotic congenital heart disease, hemodynamic effects of [Sorensen, Lynn, Stevenson, French], A961

mechanism of action of, on airways [Lenox, Sauder, Grayson, Tobias, Hirshman], A977

phosphodiesterase inhibitors dilate human internal mammary artery *In Vitro* [Levy, Salmenpera, Meyer, Harrison], A1118

pulmonary vascular effects of, during acute and chronic pulmonary hypertension, in conscious dogs [Pribble, Nyhan, Nishiwaki, Rock, Peterson, Tong, Desai, Murray], A567

randomized blinded trial of epinephrine and, and amrinone/epinephrine after cardiopulmonary bypass [Royster, Butterworth, Prielipp, Robertie, Kon], A148



- angiotensin**  
competitive *versus* non-competitive antagonism of hypertension in chronically instrumented pregnant ewes [Hammerle, Krafft, Neumark, Poschl, Wagner], A826
- aprotinin**  
high-dose, effects of: modification of hemostatic parameters during cardiopulmonary bypass [Gardaz, Hauert, Chasot, Parise, Bernath, Bachmann], A991
- aspirin**  
desmopressin does not decrease bleeding after [Horrow, Van Riper, Parmet, Osborne], A985
- bradykinin**  
intradermal, induces pain and hyperalgesia in humans [Manning, Raja, Meyuer, Campbell], A699
- calcitonin**  
effects of gene-related peptide, on skeletal muscle from patients evaluated for susceptibility to malignant hyperthermia [Fleming, Lewis, Willeford], A813
- capsaicin**  
effect of, on endotracheal pressure changes and neuropeptides release from guinea-pig lung *In Vitro* [Hogman, Hua, Grafe, Yaksh], A631
- cephapirin**  
coagulation induced by, assessment of duration of abnormalities as measured by thromboelastograph [Bauerle, Mongan, Hoskin], A70
- CP96345**  
spinal and systemic antinociceptive actions of, non-peptidic substance P antagonist, in rat [Yamamoto, Yaksh], A593
- cyclosporine**  
potentiation of neuromuscular blockade by, not mediated by pre or postsynaptic membrane effects [Sharpe, Gelb, Brown, Veitch, Henderson], A791
- desmopressin**  
does not decrease bleeding after aspirin [Horrow, Van Riper, Parmet, Osborne], A985
- dobutamine**  
administration of, skeletal muscle metabolism does not explain systemic oxygen uptake dependency on oxygen delivery with [Francois, Mebazaa, Mateo, Lucas, Payen], A257  
discrepancy between total and splanchnic O<sub>2</sub> deliveries during, [Noldge, Priebe, Armbruster, Muller, Haberstroh, Geiger], A556  
hemodynamic effects of, during septic shock treated by norepinephrine [Blanloeil, Lejus, Francois, Michel, Pinaud], A240
- dopamine**  
discrepancy between total and splanchnic O<sub>2</sub> deliveries during, [Noldge, Priebe, Armbruster, Muller, Haberstroh, Geiger], A556
- enoximone**  
administration of, skeletal muscle metabolism does not explain systemic oxygen uptake dependency on oxygen delivery with [Francois, Mebazaa, Mateo, Lucas, Payen], A257
- epinephrine**  
norepinephrine *versus*, in septic shock [Francois, Blanloeil, Lejus, Michel, Pinaud], A241
- fenoldopam**  
in management of postoperative hypertension, evaluation of [Goldberg, Cantillo, Munoz, Nemiroff, Subramoni, Torjman, Vekeman, Davis], A49  
regional vascular reactivity to, in sheep, selective sepsis-induced changes in [Schiffer, Schwieger, Poinot, Klohn, Mentha, Gaumann, Morel], A243
- G187084B**  
single escalating doses of, administered intravenously, analgesic efficacy of, in healthy adult male volunteers [Marton, Hardman, Kamiyama, Donn, Glass], A378
- histamine**  
effect of, on endotracheal pressure changes and neuropeptides release from guinea-pig lung *In Vitro* [Hogman, Hua, Grafe, Yaksh], A631
- hydalazine**  
trimethaphan *versus*, on isolated rabbit myocardium [Lee, Virtusio, Liu], A138
- ketanserine**  
hemodynamic response to intubation in healthy unpremedicated patients not decreased by [Schwieger, Forster, Tassonyi], A146
- ketorolac**  
comparison of morphine and, when used during pediatric surgery [Watcha, Jones, Schweiger, Lagueruela, White], A942  
does not decrease MAC of halothane or depress ventilation in rats [Rich, Schacterle, Moscicki, DiFazio, Adams], A769  
effect of, on postoperative opioid requirement and recovery profile [Parker, Holtmann, White], A758  
fentanyl analgesia *versus*, for outpatients undergoing operations with local anesthesia [Bosek], A762
- labetalol**  
acute metabolic acidosis in fetal lamb following maternal labetalol administration [Yeleswaram, Rurak, Hall, McMorland, Axelson], A1076  
comparison of sodium nitroprusside and, in intracranial pressure, in cats [Thiagarajah, Lear, Azar, Talavera], A619  
competitive *versus* non-competitive antagonism of hypertension in chronically instrumented pregnant ewes [Hammerle, Krafft, Neumark, Poschl, Wagner], A826  
response to treatment with, cocaine-induced hypertension and, in ewe [Hughes, Vertommen, Rosen, Messer, Espinoza, Parer, Shnider], A1075
- latex**  
allergy, anaphylaxis on induction of anesthesia associated with [Setlock, Kelly], A1043
- L-dopa**  
influence of, on minimum effective dose of halothane in rat [Horn, Sastry, Franks], A333
- methylparaben**  
effect of, on human cerebral blood flow [Gignac, Gelb, Manninen, Farrar, Lee], A196
- metoclopramide**  
analgesic adjunct for labor-like pain [Rosenblatt, Saberski, Sinatra, Cioffi], A675  
reduces pain of propofol injection [Ganta, Howard], A674
- milrinone**  
phosphodiesterase inhibitors dilate human internal mammary artery *In Vitro* [Levy, Salmenpera, Meyer, Harrison], A1118
- MK-801**  
effects of, on cerebral regional oxygen consumption in focal cerebral ischemia, [Chi, Anwar, Sinha, Weiss], A609
- nalbuphine**  
pruritus caused by continuous epidural bupivacaine-fentanyl ameliorated by, in postoperative patients [Newman, Dragisic, Lubenow, McCarthy, Ivankovich], A770
- nedocromil**  
attenuates constriction in peripheral airways [Downey, Lindeman, Hirshman], A979
- nicardipine**  
effects of, on hepatic blood flow after liver transplantation [Raucoules, Ichai, Drici, Goubaux, Gugenheim, Grimaud], A220  
reduces toxicity from IV bupivacaine with epinephrine in rats [Kinney, Horn, Hyman, Skelley, Kinney], A766  
reduction in vecuronium infusion dose requirements by, in humans [Sumikawa, Kawabata, Kamibayashi, Kita, Yoshiya], A793

- nimodipine**  
reduces cardiorespiratory toxicity of intravenous bupivacaine, in rats [Hyman, Kinney, Horn, Skelley, Kambam], A677
- nitroprusside**  
direct inotropic effects of, in isolated rabbit myocardium [Lee, Virtusio], A213
- norepinephrine**  
discrepancy between total and splanchnic O<sub>2</sub> deliveries during, [Noldge, Priebe, Armbruster, Muller, Haberstroh, Geiger], A556  
epinephrine *versus*, in septic shock [Francois, Blanloeil, Lejus, Michel, Pinaud], A241  
regional vascular reactivity to, in sheep, selective sepsis-induced changes in [Schiffer, Schwieger, Poinot, Klohn, Mentha, Gaumann, Morel], A243  
septic shock treated by, hemodynamic effects of dobutamine during [Blanloeil, Lejus, Francois, Michel, Pinaud], A240
- ondansetron**  
alfentanil-induced ventilatory depression not affected by [Dershwitz, Di Biase, Rosow, Wilson], A321
- papaverine**  
phosphodiesterase inhibitors dilate human internal mammary artery *In Vitro* [Levy, Salmenpera, Meyer, Harrison], A1118
- pentoxifylline**  
cardiorespiratory effects of, in septic and non-septic states [Mayer, Steltzer, Klimscha, Oismuller, Hammerle], A232  
improvement of oxygen utilization by, in patients with septic shock [Steltzer, Mayer, Weinstabl, Oismuller, Hammerle], A231  
*In Vivo* modulation of human neutrophil function by, in septic patients [Oismuller, Mayer, Steltzer, Michsche, Hammerle], A233
- phentolamine**  
direct inotropic effects of, in isolated rabbit myocardium [Lee, Virtusio], A213
- phenylephrine**  
competitive *versus* non-competitive antagonism of hypertension in chronically instrumented pregnant ewes [Hammerle, Krafft, Neumark, Poschl, Wagner], A826
- phenytoin**  
chronic, decreased sensitivity to metocurine during, maybe due to protein binding and receptor changes [Marty, Kim], A640
- potassium**  
effect of, on endotracheal pressure changes and neuropeptides release from guinea-pig lung *In Vitro* [Hogman, Hua, Grafe, Yaksh], A631
- propylparaben**  
effect of, on human cerebral blood flow [Gignac, Gelb, Manninen, Farrar, Lee], A196
- salbutamol**  
high dose salbutamol aerosol, effects of, on lung histology in rabbits [Spahr-Schopfer, Lerman, Cutz, PEng], A980
- sodium nitroprusside**  
comparison of labetalol and, in intracranial pressure, in cats [Thiagarajah, Lear, Azar, Talavera], A619
- theophylline**  
for post-dural puncture headache [Schwalbe, Schiffmiller, Marx], A1082
- trimethaphan**  
hydralazine *versus*, on isolated rabbit myocardium [Lee, Virtusio, Liu], A138
- verapamil**  
effects of, on local anesthetic blockade [Cohn, Laurito], A688
- Phenothiazines.** *See under* Ataractics
- Phentolamine.** *See under* Pharmacology
- Phenylephrine.** *See under* Pharmacology; Sympathetic nervous system
- Phenytoin.** *See under* Pharmacology
- Pipecuronium.** *See under* Neuromuscular relaxants
- Placenta**  
placental transfer and neonatal effects of epidural fentanyl-bupivacaine for cesarean section [Bang, Helbo-Hansen, Lindholm, Klitgaard], A847  
placental transfer of lidocaine during maternal hypoxia [Waters, Ramanathan], A828
- Plasma.** *See under* Blood
- Platelets.** *See under* Blood
- Polypeptides**  
**angiotensin**  
converting enzyme inhibitor, pulsed iontophoretic delivery of [Zakzewski, Amory, Li, Jasaitis], A371  
converting enzyme inhibitors, increased risk of prebypass myocardial ischemia in CABG patients when treated with [Schlumberger, Ceddaha, Raffin, Dubois, Fischler], A98  
is tourniquet hypertension blocked by angiotensin-converting enzyme inhibition? [Heropoulos, Schieren, Seltzer, Bartkowski, Torjman, Lessin, Moody], A158
- atrial natriuretic**  
secretion of, effect of fentanyl on, in neonatal rat cardiomyocytes [Mekhail, Doss, Estafanous, Khairallah], A328
- endorphins**  
 $\beta$ -endorphin and ACTH, post-translational processing of, in human pituitary [Bernard, Chronwall, Millington], A700  
opioid peptides in human peripheral nerves [Brooks, Rattan, Gupta, Tejwani], A591
- enkephalins**  
opioid peptides in human peripheral nerves [Brooks, Rattan, Gupta, Tejwani], A591  
perioperative changes in IL-6 with cardiac transplantation [Sakai, Latson, Whitten, Elmore, Krishnan, Ring, Lipton, Giesecke], A107
- renin-angiotensin**  
effects of pneumatic tourniquet on circulatory variables, plasma catecholamines and renin activity [Fahmy], A251
- Position**  
**effects, cardiovascular**  
of Trendelenburg position and valsalva maneuver, on cross-sectional area of internal jugular vein [van de Griendt, Muhiudeen, Cassorla, Adler, Cahalan], A423  
sitting *versus* lying, patient, tension applied to lumbar epidural catheters during removal is much greater with [Black-shear, Gravenstein, Radson], A833
- Trendelenburg**  
Valsalva maneuver and, effect of, on cross-sectional area of internal jugular vein [van de Griendt, Muhiudeen, Cassorla, Adler, Cahalan], A423
- Positive end expiratory pressure.** *See under* Lung
- Postoperative analgesia.** *See under* Analgesia
- Postoperative pain.** *See under* Pain
- Potassium.** *See under* Ions; Pharmacology
- Potency, anesthetic**  
**MAC**  
deep extubation, using isoflurane, minimum alveolar concentration for [Neelakanta, Miller, Anderson], A331  
of halothane, not decreased by ketorolac, in rats [Rich, Schacterle, Moscicki, DiFazio, Adams], A769  
of halothane in humans, effect of ethanol on [Slee, Cullen, Unadkat, Pavlin], A332  
reduction of isoflurane by fentanyl [McEwan, Smith, Dyar, Goodman, Glass], A43
- Pregnancy**  
amniotic fluid removal from human blood through cell saver processing, *In Vitro* assessment of [Thornhill, O'Leary, Lussos, Rutherford, Johnson], A830

- pharmacodynamics of cocaine altered by, in rats [Morishima, Cooper, Masaoka, Miller], A827
- pharmacokinetics of ropivacaine and bupivacaine in pregnant ewes [Wlody, Santos, Arthur, Pedersen, Morishima, Finster, Covino], A829
- substance P levels are decreased in [Mouton, Kambam, Naukum, Blanks, Rama Sastry], A842

**Premedication**

- effects of inhalational induction with desflurane, on anesthetic requirement, speed of induction and airway activity [Kelly, Hartman, Embree, Sharp, Artusio], A9
- oral midazolam, safety of, for use in children [Spahr-Schopfer, McMillan, Sikich, Hartley, Lerman], A921
- oral midazolam premedication in pediatric day surgery, efficacy and feasibility of [McMillan, Spahr-Schopfer, Sikich, Hartley], A27
- prior to CABG surgery, supplemental O<sub>2</sub> and [Kavanagh, Cheng, Sandler, Lawson, Chung], A104
- transmucosal midazolam for, in pediatric patients: comparison of intranasal and sublingual routes [Karl, Larach, Ruffe], A922

**Pressure monitoring. See under Monitoring**

**Procaine. See under Anesthetics, local**

**Proparacaine. See under Anesthetics, local**

**Propofol. See under Anesthetics, intravenous**

**Propylparaben. See under Pharmacology**

**Prostaglandins. See under Hormones**

**Protamine. See under Blood**

**Protein. See under Metabolism**

**Pulmonary arterial catheters. See under Equipment, catheters**

**Pulmonary artery. See under Lung**

**Pulmonary infection. See under Infection**

**Pulse monitor. See under Equipment; Measurement techniques**

**Pulse rate. See under Heart**

**Pupil. See under Eye**

**Purkinje fibers. See under Heart**

**R**

**Radial arteries. See under Arteries**

**Radiation exposure. See under Complications**

**Ranitidine. See under Histamine**

**Receptors. See also under Parasympathetic nervous system**

**adrenergic**

- alteration of alpha and beta receptor binding: possible mechanism for halothane-epinephrine sensitization [Skupski, Miletich, Minshall, Albrecht], A159

- β-adrenergic receptor desensitization during cardiopulmonary bypass [Schwinn, Leone, Chestnut, Spahn, Page, Liggett], A1119

- diethyl ether enhances GABA-gated chloride flux by allosteric mechanism [Quinlan, Firestone], A1034

- dopamine-2 receptor mRNA, cellular localization of, in rat trigeminal ganglion [Peterfreund, Kosofsky, Fink], A596

- etomidate modulation of central GABAA-receptor gated current [Yang], A578

- GABAA, modulation of, by propofol: protein or lipid interaction? [Hales, Lambert], A587

- GABA-mediated inhibitory postsynaptic currents at synapses between cultured rat hippocampal neurons prolonged by clinical concentration of three volatile anesthetics [Jones, Hornberger, Harrison], A580

- is GABA-mediated synaptic transmission enhanced by propofol? [Yamamura, Ohtsuka, Furumido, Tsutahara, Kemmotsu], A588

- scorpion venom that activates normal and inhibits malignant hyperthermia susceptible ryanodine receptors [Valdivia, Hayek, Hogan, Coronado], A643

- three volatile anesthetics enhance GABA-activated chloride currents in cultured rat hippocampal neurons at clinically relevant concentrations [Harrison, Jones, Brooks], A1040

- thromboxane blockade, effect of, following inhalation injury in sheep [Locik, Traber, Theissen, Flynn, Traber], A224

**Recovery**

- from ambulatory surgery, effect of ondansetron on recovery time, sedation level and discharge [Kovac, Steer, Hutchison, Calkins, Joslyn], A7

- from atracurium-induced paralysis, enhanced by succinylcholine [Huang, Simpson], A783

- effect of intraoperative ketorolac on, after outpatient laparoscopy [DeLucia, White], A14

- energy expenditure, relation between intraoperative heat balance and [Just, Delva, Camus, Lienhart], A261

- ketorolac superior to sufentanil, giving longer pain relief with less nausea and less recovery time after laparoscopy [Belamy, Chovan, Brose, Gunzenhauser], A29

- from neuromuscular blockade, pre- and postsynaptic effects of ORG 9426 during onset of and [Watanabe, Chen, Ohta, Nagashima, Foldes], A798

- PADS-A discriminative discharge index for ambulatory surgery [Chung, Ong, Seyone, Mati, Chan], A1105

- postoperative T-wave abnormalities in recovery room, incidence and outcome of patients with: retrospective analysis [Chhangani, Nedumogottil, Kartha], A1014

**regulation**

- thermal manipulations, appropriate, eliminate post-anesthetic tremors in rats [Grahn, Heller, Heller], A279

**temperature**

- thermal manipulations, appropriate, eliminate post-anesthetic tremors in rats [Grahn, Heller, Heller], A279

- use of pulse oximetry as predictor of post-anesthesia care unit duration in smokers and nonsmokers [Handlin, Baker], A903

**Reflexes**

- autonomic, caused by propofol, surgical stimulation significantly reduces depression of [Latson, Wiley, O'Flaherty], A85

**baroreceptor**

- control of heart rate during high thoracic epidural anesthesia [Goertz, Seeling, Heinrich], A87

- effect of isoflurane on, in rabbit [Wilson, Bell, Quandt, Kampine], A1120

- heart rate responses to pharmacological-induced ramp increases and decreases in arterial pressure in awake human volunteers [Duke, Morton, Ong, Hill], A568

**mesenteric**

- venoconstriction, differential effect of inhaled isoflurane on, in normotensive and chronically hypertensive rabbit [Stekiel, Tominaga, Bell, Bosnjak, Kampine], A571

- swallowing, depression of, two hours after midazolam [Lambert, D'Honneur, Abhay, Gail, Duvaldestin], A891

- swallowing, effect of pharyngo-laryngeal topical lidocaine on [Dalibon, Dureuil, Montravers, Ducros, Desmonts], A125

**Regional anesthesia. See under Anesthetic techniques**

**Renin-angiotensin. See under Polypeptides**

**Research**

- abstracts presented at anesthesia meetings: here today and gone tomorrow? [Campbell, Yentis, Lerman], A886

**Resident education. See under Education**

**Residents. See under Personnel**

**Respiratory distress syndrome. See under Lung**

Respiratory quotient. *See under* Metabolism

Respiratory resistance. *See under* Lung

Resuscitation. *See under* Heart

Rocuronium. *See under* Neuromuscular relaxants

Ropivacaine. *See under* Anesthetics, local

## S

Salbutamol. *See under* Pharmacology

Scheduling. *See under* Anesthesia

Septic shock. *See under* Shock

Septicemia. *See under* Infection

Serotonin

release in spinal cord, similar actions of clonidine and fentanyl and norepinephrine on [Maytorena, Gandhi, Jones], A601

release of 5-hydroxytryptamine and thromboxane A2 from human platelets, inhibited by halothane and isoflurane, in humans [Blaise, Buluran], A520

Sevoflurane. *See under* Anesthetics, volatile

Shivering. *See under* Complications

Shock

hemorrhagic, veno-arterial gradients for P<sub>CO</sub><sub>2</sub> and pH reflect tissue hypoxia during, in dogs [Vanderlinden, Gilbert, Paques, Bakker, Vincent], A236

septic

dextran 60 or fluid gelatin for fluid expansion in [Auffray, Papazian, Perrin, Saux, Martin], A242

norepinephrine *versus* epinephrine in [Francois, Blanloeil, Lejus, Michel, Pinaud], A241

relationship between oxygen delivery and mixed venous oxygen saturation during [Levrant, Jambou, Kaidomar, Grimaud], A234

treated by norepinephrine, hemodynamic effects of dobutamine during [Blanloeil, Lejus, Francois, Michel, Pinaud], A240

Shunting. *See under* Lung

Skin

blood flow

reduction of transcutaneous oxygen and, by hyperventilation, in extremities [Barker, Hyatt, Clarke], A409

temperature

warmed, effect of, on heat gain: skin surface warming during surgery [Delva, Camus, Just, Ollivier, Lienhart], A490

Sodium. *See under* Ions

Sodium nitroprusside. *See under* Anesthetic techniques, hypotensive; Pharmacology

Spasm. *See under* Larynx

Spectroscopy. *See under* Measurement techniques

Spinal anesthesia. *See under* Anesthetic techniques

Spinal cord

α<sub>2</sub>-adrenoceptors in, preliminary characterization of, by autoradiography, in sheep [Bucklin, Eisenach, Rooze], A664

antinociceptive actions of GABA<sub>A</sub> agonists in, effect of pentobarbital or diazepam on, in rat [Howard, Hammond], A579

dorsal horn ganglia

isoflurane modulates calcium channel current in [Heath, Berman], A1037

effects of topical colchicine and spinal capsaicin on thermal hyperesthesia in compression mononeuropathy model [Yamamoto, Yaksh], A599

effects of volatile general anesthetics and alcohols on spinal cord protein kinase [Austin, Firestone], A1041

evoked potentials, for innocuous and noxious electrical stimuli, component-specific and naloxone reversible effects of fentanyl on, in rabbit [Lee], A652

nociceptive neurotransmission in, depression of: propofol and barbiturates [Jewett, Tarasiuk, Gibbs, Kendig], A589

progesterone-mediated potentiation of spinal opiates [Carp, Jayaram], A838

sciatic nerve ligation increases mRNA coding for substance P and dynorphin in, in rat [Carpenter, Nepom, Yaksh, Yamamoto], A1089

sensory processing, what role do alpha-adrenergic systems play in tonic modulation of? [Kishikawa, Collins, Uchida], A645

serotonin release in, similar actions of clonidine and fentanyl and norepinephrine on [Maytorena, Gandhi, Jones], A601

spinal and systemic antinociceptive actions of CP96345, non-peptidic substance P antagonist, in rat [Yamamoto, Yaksh], A593

spinally administered α<sub>2</sub> agonists, pharmacology of antinociceptive effect of [Takano, Yaksh], A630

Statistics

comparison of artificial neural networks and classical statistical analysis [Watt, Samuelson, Navabi], A451

statistical artifact, neuropsychological change and [Mitzel, Albin, Costello], A1030

Stomach. *See under* Gastrointestinal tract

Stored blood. *See under* Blood

Subclavian vein. *See under* Veins

Succinylcholine. *See under* Neuromuscular relaxants

Sufentanil. *See under* Analgesics; Anesthetics, intravenous

Surgery

cardiovascular

cardiac surgical patients plasma enhances oxygen free radical production in neutrophils [Nakamura, Bonventre, Inada, deBros, Shibata, Kono, Philbin], A95

cardiopulmonary bypass, elimination of metocurine by hemofiltration in [Hogue, Itani, Martyn], A801

cardiopulmonary bypass, isoflurane elimination from membrane oxygenator during [Eckenbrecht, Griffin, Quinn], A367

cardiopulmonary bypass, management of anti-coagulation during [Urban, Gordon, Farrell, Shaffer], A437

cardiopulmonary bypass, predicting bleeding in, sensitivity and specificity of APTT and PT by portable laser photometer in [Nuttall, Oliver, Beynen, Nichols], A431

cardiopulmonary bypass, thromboelastographic fibrinolysis does not correlate with levels of D-dimers after [Whitten, Allison, Latson, Elmore, Gulden, Burkhardt, Hyndman], A432

cardiopulmonary bypass, ventilation, thermal noise, and errors in cardiac outputs after [Latson, Whitten, Elmore, Wiley, O'Flaherty], A478

comparison of ACT and TEG in patients receiving autologous platelet-rich-plasma during [Wong, Jones, Wade], A434

desensitization of beta-adrenergic receptor system caused by [Smiley], A559

emergency coronary artery bypass: identification of high-risk subsets [Tuman, McCarthy, Corey, Ivankovich], A101

hypothermic cardiopulmonary bypass, rewarming injury impairs cerebral blood flow after [Johnston, Vinten-Johansen, DeWitt, Stump, Prough], A543

ICU sedation following: propofol *versus* midazolam [Higgins, Yared, Estafanous, Coyle, Vassel, Goodale], A278

post-bypass bleeding, prevention of, with cyklokapron and amicar [Karski, Teasdale, Carroll, Glynn], A275

- risk factors for respiratory complications after [Higgins, Yared, Paranandi, Baldyga, Starr], A258
- simplified risk scoring system for patients undergoing [McCarthy, Tuman, Corey, Ivankovich], A114
- carotid endarterectomy**
- anesthesia for; propofol *versus* etomidate-isoflurane [Paillot, Van Hemelrijck, Van Aken], A180
- four channel density spectral array does not reliably detect mild cerebral ischemia during [Kearse, Martin, McPeck], A1028
- narcotic anesthesia during, prevalence of epileptiform activity of [Kearse, McPeck], A1029
- perioperative myocardial ischemia in [Landesberg, Eidelman, Erel, Anner, Assaf, Halimi, Luiria, Gotsman, Berlatzky, Cotev], A94
- thoracic**
- lumbar epidural fentanyl reduces pain following, pre-incisional *versus* post-incisional: randomized double-blind crossover study [Kavanagh, Katz, Sandler, Nierenberg, Panos], A1087
- transplantation**
- kidney, evaluation of proconvulsant effect of laudanose in recipient [Lepage, Athouel, Vecherini, Malinovsky, Cozian], A781
- kidney, hemodynamic effects of OKT3 during [Robinson], A139
- liver, changes in IL-6 during [Sakai, Whitten, Roberts, Latson, Krishnan, Lipton, Ramsay, Giesecke], A624
- liver, comparative evolution of renal hemodynamics during, with and without veno-venous bypass [Veroli, Elhage, Gilton, Descorps-Declere, Jayais, Ecoffey], A219
- liver, effect of aprotinin on fibrinolysis during [Tartiere, Deshayes, Samba, Le Querrec, Gerard], A218
- liver, effects of nicardipine hydrochloride on hepatic blood flow after [Raucoules, Ichai, Drici, Goubaux, Gugenheim, Grimaud], A220
- liver, glucose/insulin decreases potassium level in anhepatic patients [Frenette, De Wolf, Kang, Tang], A217
- liver, graft function after, value of total body oxygen consumption as parameter of [Groh, Gerhard, Forst, Welte, Dieterich, Pratschke, Peter], A479
- liver, hormonal influences on renal function during [Roberts, Sakai, Duke, Ramsay, Whitten], A622
- liver, implications for coagulopathy during: hepatic regulation of fibrinolysis [Kelley, Bissell], A565
- liver, on-line assessment of liver graft function by recording neuromuscular transmission during liver transplantation in pigs [Pittet, Mentha, Schopfer, Morel, Benakis, Tassonyi], A815
- liver, plasma laudanose levels in patients receiving continuous atracurium infusions during [Peters, Matsumi, Lawhead, Landers, Becker, Earl], A303
- liver, rapid increase in sodium associated with CPM after [Videira, Kang, Martinez, DeWolf, Aggarwal, Gasior], A222
- liver, reperfusion during, metabolic and ECG changes associated with [Gabrielson, Nam, Reich], A990
- liver, reperfusion syndrome during: echocardiographic analysis of ventricular dynamics [Gabriel, Muller, Tuchy, Hackl, Zimpfer], A992
- liver, solution for hemodynamic instability that minimizes blood transfusion requirement in [Lin, Lichtor, Emond, Broelsch], A988
- liver, transesophageal echocardiography during [Roberts, Duke, Gottlich, Ramsay], A388
- liver, with post-reperfusion syndrome, myocardial depressant effect of plasma from: *In Vitro* study [Jayais, Chemla, Ecoffey, Descorps-Declere, Samii, Lecarpentier], A554
- subarachnoid adrenal medullary [Winnie, Krolick, Sagen, Pappas, Wang], A695

**vascular**

- abdominal aortic crossclamping in humans, estimation of O<sub>2</sub> deficit and debt resulting from [Perkins, Roberts, Shah, Feustel, Cohen], A113
- abdominal aortic surgery, midazolam infusion for conscious sedation following [Miller, Martineau, Dean, Vallee, LeBel], A271
- aortic, under balanced anesthesia, anesthetic drug requirements and hemodynamic response during, not influenced by clonidine [Favre, Gardaz, Nussberger, Chiolero], A151
- aortic occlusion, neurogenic motor evoked potentials are predictive of neurologic function in porcine model of [Mongan, Peterson], A1123
- aortic unclamping, metabolic monitoring of early repayment phase following, comparison of patients with abdominal aortic aneurysm and vascular occlusive disease [Roberts, Cohen, Perkins, Robbiano, Shah], A149
- assessment of cardiac risk before abdominal aortic surgery: unreliability of both dipyridamole thallium scintigraphy and gated radionuclide angiography [Baron, Mundler, Bertrand, Vicaut, Coriat, Kieffer, Viars], A100
- effect of fluid loading on right ventricular function and hemodynamic state with aortic unclamping during abdominal surgery [Nakatsuka, Posner, Thomas], A105
- hemodynamics and oxygen uptake below and above occlusion of thoracic aorta in dogs: effects of dexmedetomidine [Gelman, Gregoretti, Henderson, Parks], A575
- major, natural anti-coagulant levels following [Gibbs, Crawford, Michalopoulos], A72
- Sympathetic nervous system**
- activity of, effect of atracurium on [Yoneda, Nishizawa, Benson, Goto, Arakawa], A780
- alpha-adrenergic agonists**
- clonidine, added to mepivacaine for brachial plexus blockade: minimal effective dose prolonging duration of both anesthesia and analgesia [Bartholomee, Singelyn, Broka, Gouverneur], A1084
- clonidine, adding fentanyl and, to mepivacaine, results in rapid onset and prolonged anesthesia and analgesia after brachial plexus blockade [Singelyn, Muller, Gouverneur], A653
- clonidine, anesthetic drug requirements and hemodynamic response during aortic surgery under balanced anesthesia not influenced by [Favre, Gardaz, Nussberger, Chiolero], A151
- clonidine, combining low dose morphine and, prevents bladder size increase: cystographic study in rabbits [Wang, Li, Hiller], A634
- clonidine, comparative effects of ketanserin and, on postoperative shivering [Banache, Joris, Lamy], A51
- clonidine, comparison of bupivacaine and, for postoperative analgesia [Carabine, Milligan, Moore], A1083
- clonidine, comparison of guanfacine and, in regard to duration of antinociception, and ventilatory and hemodynamic effects [Smith, Baudendistel, Gibbons, Schweiss], A655
- clonidine, differences in attenuation of  $\alpha$ 1 and  $\alpha$ 2 adrenoceptor-mediated pressor responses by halothane and isoflurane in dogs [Tsuchida, Sato, Namiki], A551
- clonidine, does not prevent myocardial ischemia during non-cardiac surgery [Lipazyc, Engelman], A93
- clonidine, does not reduce postoperative meperidine requirements [Striebel, Gotschalk, Kramer], A659
- clonidine, effect of, on ventilation and ventilatory depression produced by alfentanil in volunteers [Jarvis, Duncan, Segal, Maze], A982
- clonidine, effects of, on C-fiber action potential, interaction with lidocaine [Gaumann, Brunet, Jirounek, Morel, Volet], A656

- clonidine, effects of urapidil and, on left ventricular performance [Lepage, Pinaud, Malinovsky, Cozian, Souiron], A137
- clonidine, epidural, following cesarean section: effect of prior local anesthetic [Huntoon, Eisenach, Boese], A855
- clonidine, epidural, for refractory reflex sympathetic dystrophy [Rauk, Eisenach, Jackson, Speight, Southern], A657
- clonidine, epidural, reduces epidural fentanyl requirements and side effects in postoperative patients [Delaunay, Lepert, Dechaubry, Baubillier, Bonnet], A1086
- clonidine, intraoperative, enhances postoperative morphine patient controlled analgesia [Dekock, Pichon, Scholtes], A654
- clonidine, intrathecal, is acetylcholine released by? [Tong, Eisenach, Shea, Bucklin, Limauro], A658
- clonidine, IV equally effective as morphine IV for postoperative analgesia: double-blind study [Tryba, Zenz, Strumpf], A1085
- clonidine, morphine and, contrasting action of intrathecal Kappa agonist (U50-488H) in visceral pain processing as compared to [Harada, Nishioka, Kitahata, Collins], A663
- clonidine, preoperative oral, reduced anesthetic requirement for CABG surgery and [Howie, Hiestand, Romanelli, Harris, Rezaei, McSweeney], A41
- clonidine, prevents postoperative increase in  $VO_2$  [Delaunay, Bonnet, Liu, Duvaldestin], A981
- clonidine, reduction of catecholamine response to CABG surgery by [Hiestand, Howie, Romanelli, Jopling, Rezaei, McSweeney], A153
- clonidine, significant synergism between intrathecal morphine and, for visceral antinociception [Harada, Nishioka, Kitahata, Collins], A660
- clonidine, similar actions of fentanyl and norepinephrine and, on serotonin release in spinal cord [Maytorena, Gandhi, Jones], A601
- clonidine, spinally administered, agonist and antagonist pharmacology of antinociceptive effect of [Takano, Yaksh], A630
- clonidine, systemic effects of bupivacaine and, [Carabine, Milligan, Moore], A661
- dexmedetomidine, alteration of thiopental dose requirement and distribution pharmacokinetics by [Mappes, Buhrer, Lauder, Stanski, Maitre], A306
- dexmedetomidine, continuous IV infusion of, as anesthetic adjuvant in hysterectomy [Aho, Erkola, Kallio, Scheinin, Korttila], A308
- dexmedetomidine, effect of, on cerebrovascular response to hypoxia during isoflurane anesthesia [McPherson, Traystman], A174
- dexmedetomidine, effects of, on hemodynamics and oxygen uptake below and above occlusion of thoracic aorta in dogs [Gelman, Gregoretti, Henderson, Parks], A575
- dexmedetomidine, effects of, on vecuronium-induced twitch depression, in rat model [Henry, Weinger, Partridge], A794
- dexmedetomidine, interaction of intravenous anesthetic agents and, in chronically instrumented dogs [Proctor, Schmeling, Kampine, Warltier], A558
- dexmedetomidine, intrathecal, epidural, and intravenous, pharmacokinetic and dynamic studies of [Bucklin, Eisenach, Tucker], A662
- dexmedetomidine, IV, pharmacokinetics of, in adults [Dyck, Maze, Shafer], A310
- dexmedetomidine, mediating role of  $\alpha_2$  adrenoceptors in locus ceruleus for hypnotic response to, in rats [Correa-Sales, Rabin, Maze], A635
- dexmedetomidine, outcome from incomplete cerebral ischemia improved by, in rat [Hoffman, Kochs, Werner, Albrecht], A608
- dexmedetomidine, spinally administered, agonist and antagonist pharmacology of antinociceptive effect of [Takano, Yaksh], A630
- dexmedetomidine, synergistic interaction between  $\alpha_2$  adrenergic agonists and benzodiazepines in rats [Salonen, Reid, Maze], A1125
- dexmedetomidine and fentanyl, anesthetic and hemodynamic interactions of, in dogs [Salmenpera, Szlam, Hug], A307
- dexmedetomidine effects on human drug biotransformation, ketamine metabolism as probe for, [Kharasch], A311
- dexmedetomidine reduces intraocular pressure, intubation responses and anesthetic requirements in ophthalmic surgery [Ali-Melkkila, Jaakola, Kanto, Scheinin, Kallio], A309
- guanfacine, comparison of clonidine and, in regard to duration of antinociception, and ventilatory and hemodynamic effects [Smith, Baudendistel, Gibbons, Schweiss], A655
- medetomidine, sedative and hemodynamic effects of, in chronically instrumented Yucatan mini swine [Bloor, Kim, Vainio], A577
- norepinephrine, similar actions of clonidine and fentanyl and, on serotonin release in spinal cord [Maytorena, Gandhi, Jones], A601
- phenylephrine, differences in attenuation of  $\alpha_1$  and  $\alpha_2$  adrenoceptor-mediated pressor responses by halothane and isoflurane in dogs [Tsuhida, Sato, Namiki], A551
- phenylephrine, intranasal, in children, clinical effects of pharmacokinetics of [Christensen, Armstead, Bilyu, Johnson, Friesen], A967
- phenylephrine, magnesium depresses gravid ewe carotid and uterine artery dose response to, *In Vitro* [Bollen, Chestnut, Liu, Weiner], A820
- phenylephrine-induced bradycardia does not correlate with changes in heart-rate variability [Jaffe, Fung, Behrman], A444
- UK-14304, sedative and hemodynamic effects of, in chronically instrumented Yucatan mini swine [Bloor, Kim, Vainio], A577
- alpha-adrenergic receptors**
- $\alpha_1$ -adrenergic receptor subtype couples to phospholipase C [Schwinn, Page, Cotecchia, Caron, Lefkowitz], A629
- $\alpha_2$ -adrenoceptors, preliminary characterization of, by autoradiography, in sheep [Bucklin, Eisenach, Rooze], A664
- $\alpha$ -adrenoceptor subtype, role of, during mesenteric venoconstriction in response to celiac ganglion stimulation [Tominaga, Stekiel, Bosnjak, Kampine], A570
- role of, in tonic modulation of spinal sensory processing [Kishikawa, Collins, Uchida], A645
- assessment of, during anesthesia, new approach to [Deegan, He, Wood, Wood], A560
- autonomic nervous system function, continuous measurement of pupillary area fluctuations as marker of [Kimura, Komatsu, Shimada], A1003
- beta-adrenergic agonists**
- open-state probability of voltage-dependent calcium channels in airway smooth muscle decreased by [Tomasic, Boyle, Kotlikoff], A584
- beta-adrenergic antagonists**
- esmolol, comparison of fentanyl and, as anesthetic adjuncts during rapid sequence induction [Chung, Sinatra, Halevy, Paige, Silverman], A155
- esmolol, determining effectiveness of, to protect against ischemia, use of myocardial tissue impedance in [Howie, Romanelli, Hiestand, Liu, Rezaei, McSweeney], A443
- esmolol blunts tachycardia due to topical cocaine and lidocaine with epinephrine infiltrations [Czinn, Rock, Friedman, Crystal, Salem], A34

**beta-adrenergic receptors**

- β-adrenergic receptor desensitization during cardiopulmonary bypass [Schwinn, Leone, Chestnut, Spahn, Page, Liggett], A1119
- altered β-adrenergic cholinergic interaction in airways of basenji-greyhound dogs [Curry, Emala, Black, Hirshman], A976
- density of, in different human heart diseases and relationship to degree of heart failure [Steinfath, Lavicky, Schmitz, Scholz], A163
- desensitization of, caused by cardiac surgery [Smiley], A559
- blockade
- CT-guided thoracic sympathetic neurolysis [Jackson, Rauck], A721

**celiac plexus**

- neurolytic block, is diagnostic block necessary prior to? [Jain, Chiang, Vanderslice], A749
- neurolytic block of, new approach to: transintervertebral disc technique [Ina, Kobayashi, Narita, Taneyama, Kiyono], A718

**dystrophy**

- reflex sympathetic, in children: follow-up of 70 patients [Wildner, Berde, Wolohan, Micheli, Vieyra], A693
- reflex sympathetic, intravenous regional bretylium for treatment of [Hord, Rocks, Stephens, Fleming], A734
- refractory reflex sympathetic, epidural clonidine for [Rauck, Eisenach, Jackson, Speight, Southern], A657

**epinephrine**

- modifying stress response during total intravenous anesthesia [Monk, Ding, Smith, White], A42

**ganglionic blockade**

- induced by methylalntrexone, in dog [Foss, Orelind], A637

**norepinephrine**

- modifying stress response during total intravenous anesthesia [Monk, Ding, Smith, White], A42

**pharmacology**

- bretylium, intravenous regional, for treatment of reflex sympathetic dystrophy [Hord, Rocks, Stephens, Fleming], A734
- dopamine, regional hemodynamic dose-responses to, compared to fenoldopam, in sedated sheep [Schwieger, Schiffer, Poinot, Klohn, Mentha, Guamann, Morel], A563
- dopamine infusion, or norepinephrine, during thoracic epidural anesthesia? differences in hemodynamic effects and plasma norepinephrine levels [Lundberg, Biber, Martner, Raner, Winso], A740
- dopamine-2 receptor mRNA, cellular localization of, in rat trigeminal ganglion [Peterfreund, Kosofsky, Fink], A596
- ephedrine, beneficial effect of, on uterine perfusion during pregnancy, vascular mechanism of [Tong, Eisenach], A825
- ephedrine, which vasopressor should one give to treat hypotension during magnesium sulfate infusion and epidural anesthesia? [Chestnut, Vincent, Sipes, Debruyne, Bleuer, Chatterjee], A824
- epinephrine, causes pulmonary hypertension but not edema in isolated pig lung [Toung, Reily, McPherson, Traystman], A1021
- epinephrine, effect of, on alanine turnover and urea production rate in volunteers [Trager, Ensinger, Anhaupl, Georgieff, Rugheimer], A274
- epinephrine, effects of pneumatic tourniquet on circulatory variables, plasma catecholamines and renin activity [Fahmy], A251
- epinephrine, hormonal responses during hypotensive epidural anesthesia [Zayas, Sharrock, Blumefeld, McDonald, Sealy], A112
- epinephrine, pharmacokinetics and comparative efficacy of, during out-of-hospital CPR [Schuttler, Hornchen, Bremer], A287

- epinephrine increases bupivacaine toxicity in rats [Kinney, Hyman, Horn], A681
- fenoldopam, regional hemodynamic dose-responses to, compared to dopamine, in sedated sheep [Schwieger, Schiffer, Poinot, Klohn, Mentha, Guamann, Morel], A563
- norepinephrine, causes pulmonary hypertension but not edema in isolated pig lung [Toung, Reily, McPherson, Traystman], A1021
- norepinephrine, effects of pneumatic tourniquet on circulatory variables, plasma catecholamines and renin activity [Fahmy], A251
- norepinephrine, endogenous effect of, attenuated by volatile anesthetics, in isolated rabbit mesenteric veins [Stadnicka, Flynn, Bosnjak, Kampine], A572
- norepinephrine, hormonal responses during hypotensive epidural anesthesia [Zayas, Sharrock, Blumefeld, McDonald, Sealy], A112
- norepinephrine infusion, or dopamine, during thoracic epidural anesthesia? differences in hemodynamic effects and plasma norepinephrine levels [Lundberg, Biber, Martner, Raner, Winso], A740
- norepinephrine vasoconstriction, interaction between nitric oxide and, in anesthetized rabbits [Lossner, Lenfant, Pastor, Teisseire, Payen], A562
- phenylephrine, which vasopressor should one give to treat hypotension during magnesium sulfate infusion and epidural anesthesia? [Chestnut, Vincent, Sipes, Debruyne, Bleuer, Chatterjee], A824

Synapses. *See under Brain*

**T**

**Tamponade.** *See under Heart*

**Temperature.** *See also under Recovery; Skin*

**body**

- heat storage capacity of peripheral thermal compartment [Hynson, Sessler, Moayeri, McGuire], A195
- in pediatric patients, effect of lower limb tourniquet on [Ginsberg, Bloch, Binner], A957
- pre-induction skin-surface warming prevents redistribution hypothermia [Moayeri, Hynson, Sessler, McGuire], A1004
- skin warming during abdominal surgery in lithotomy position, prevention of hypothermia by [Delva, Camus, Just, Olivier, Lienhart], A1011

**cooling**

- conventional monitoring is poor correlate of efficient brain cooling [Kern, Jonas, Mayer, Hanley, Castenada, Hickey], A57
- skin surface warming before epidural block bunts anesthetic-induced hypothermia [Glostenm, Hynson, Sessler, McGuire], A854
- effect of, on twitch response of rabbit tibialis anterior muscle [Fauvel, Feldman], A809

**heating**

- thermal balance using forced air warmer during abdominal surgery [Camus, Delva, Just, Crubille, Lienhart], A491

**monitoring**

- brain, during deep hypothermia, recorded at standard monitoring sites [Stone, Young, Smith, Solomon, Ostapovich, Wang], A483
- tympic membrane, effect of hyperventilation on, as measured by infrared scanning [Romanelli, Hiestand, Howie, Wert], A482

**regulation**

- dose-response for thermoregulatory sweating threshold and gain during isoflurane anesthesia [Washington, Sessler, Prager, McGuire, Merrifield, Hudson, Moayeri], A194
- heat storage capacity of peripheral thermal compartment [Hynson, Sessler, Moayeri, McGuire], A195

- intraoperative, relation between recovery energy expenditure and [Just, Delva, Camus, Lienhart], A261
- maternal, during epidural analgesia for labor [Hortvet, Camann, Hughes, Bader, Datta], A849
- pre-induction skin-surface warming prevents redistribution hypothermia [Moayeri, Hynson, Sessler, McGuire], A1004
- skin surface warming before epidural block bunts anesthetic-induced hypothermia [Glostenm, Hynson, Sessler, McGuire], A854
- skin warming during abdominal surgery in lithotomy position, prevention of hypothermia by [Delva, Camus, Just, Olivier, Lienhart], A1011
- rewarming injury impairs cerebral blood flow after hypothermic CPB [Johnston, Vinten-Johansen, DeWitt, Stump, Prough], A543
- Teratogenicity.** *See under Toxicity*
- Tetracaine.** *See under Anesthetics, local*
- Theophylline.** *See under Pharmacology*
- Theories of anesthetic action**
- general anesthetic effects on protein kinase C activity are substrate-dependent [Firestone, Gray, Firestone], A1042
- Meyer-Overton**
- general anesthetic potency of propofol is consistent with [Tonner, Poppers, Alifimoff, Miller], A586
- Thiamylal.** *See under Anesthetics, intravenous*
- Thiopental.** *See under Anesthetics, intravenous*
- Thoracic anesthesia.** *See under Anesthesia*
- Thoracic surgery.** *See under Surgery*
- Thrombosis.** *See under Complications*
- Thyroid hormones.** *See under Hormones*
- Tomography.** *See under Measurement techniques*
- Tourniquets.** *See under Equipment*
- Toxicity.** *See also under Liver; Oxygen*
- bupivacaine, increased by epinephrine, in rats [Kinney, Hyman, Horn], A681
- local anesthetic cardiovascular, possible mechanism of: stimulation of cyclic AMP production by bupivacaine [Butterworth, Brownlow, Cole, Prielipp, Anderson], A682
- local anesthetics**
- cardiorespiratory toxicity of intravenous bupivacaine reduced by nimodipine, in rats [Hyman, Kinney, Horn, Skelley, Kambam], A677
- IV bupivacaine with epinephrine, nicardipine reduces toxicity from, in rats [Kinney, Horn, Hyman, Skelley, Kinney], A766
- lidocaine-induced convulsion, effect of acute hypertension on, in rats [Yokoyama, Benson, Goto, Unruh, Arakawa], A717
- teratogenicity**
- developmental toxicity of non-depolarizing muscle relaxants in cultured rat embryos [Fujinaga, Baden, Mazze], A850
- Trachea.** *See under Lung*
- Tracheal intubation.** *See Intubation, tracheal*
- Transducers.** *See under Equipment*
- Transfusion**
- autotransfusion**
- amniotic fluid removal from human blood through cell saver processing, *In Vitro* assessment of [Thornhill, O'Leary, Lussos, Rutherford, Johnson], A830
- may induce secondary neuromuscular blockade in postoperative patients [Montefiore, Boico, Deghani, Bonnet, Zetlaoui], A795
- complication**
- hyperkalemia with, in emergent and trauma surgery [Wall, Pavlin], A250
- in elective surgery today in European community [Baele], A894
- hemodilution during bone marrow harvest in children as means of avoiding [Perez de Sa, Bekassy, Schou, Werner], A1052
- massive, in trauma center, rapid availability of blood for: new approach using blood blocks [Coveler, Werch, Todd], A109
- Transplantation.** *See under Heart; Surgery*
- Transtracheal ventilation.** *See under Ventilation*
- Trauma.** *See under Complications*
- Trendelenburg's position.** *See under Position*
- Trimethaphan.** *See under Pharmacology*
- Tubes, endotracheal.** *See under Equipment*
- d-Tubocurarine.** *See under Neuromuscular relaxants*
- U
- UK-14304.** *See under Sympathetic nervous system, alpha-adrenergic agonists*
- Ultrasound.** *See under Measurement techniques*
- Urologic anesthesia.** *See under Anesthesia*
- Uterus**
- blood flow**
- cocaine-induced hypertension and response to treatment with labetalol, in ewe [Hughes, Vertommen, Rosen, Messer, Espinoza, Parer, Shnider], A1075
- competitive *versus* non-competitive antagonism of hypertension in chronically instrumented pregnant ewes [Hammerle, Krafft, Neumark, Poschl, Wagner], A826
- does calcium chloride increase blood pressure and, during hemorrhagic hypotension in hypermagnesemic gravid ewes? [Vincent, Chestnut, Sipes, Thompson, Bleuer, Debruyne, Chatterjee], A822
- epidural anesthesia worsens hypotension and, during hemorrhage, in gravid ewes [Vincent, Chestnut, Sipes, Thompson, Debruyne, Bleuer, Chatterjee], A823
- fetal well-being and: effect of sevoflurane and isoflurane in pregnant sheep [Stein, Masaoka, Wlody, Santos, Pedersen, Morishima, Finster], A851
- maternal and fetal effects of propofol anesthesia in ewe [Alon, Rosen, Shnider, Ball, Parer], A1077
- uterine and gravid ewe carotid artery dose response to phenylephrine depressed by magnesium, *In Vitro* [Bollen, Chestnut, Liu, Weiner], A820
- uterine perfusion during pregnancy, vascular mechanism of ephedrine's beneficial effect on [Tong, Eisenach], A825
- which vasopressor should one give to treat hypotension during magnesium sulfate infusion and epidural anesthesia? [Chestnut, Vincent, Sipes, Debruyne, Bleuer, Chatterjee], A824
- V
- Valves.** *See under Equipment*
- Vaporizers.** *See under Equipment*
- Vascular surgery.** *See under Surgery*
- Vasculature.** *See under Lung*
- Vecuronium.** *See under Neuromuscular relaxants*
- Veins**
- isolated mesenteric, volatile anesthetics attenuate endogenous norepinephrine effect in, in rabbits [Stadnicka, Flynn, Bosnjak, Kampine], A572
- jugular**
- cannulation, angle of incidence of 9.0-French, high-volume infusion introducer sheaths and relative perforating potential [Carter, Blackshear, Gravenstein], A1008
- cannulation, new complication of: valve injury [Imai, Hanaoka, Sugawara], A897
- complications, valve injury, in internal jugular vein cannulation [Imai, Hanaoka, Sugawara], A897



- internal, cross-sectional area of, effect of Trendelenburg position and valsalva maneuver on [van de Griendt, Muhiudeen, Cassorla, Adler, Cahalan], A423
- subclavian**
- angle of incidence of 9.0-French, high-volume infusion introducer sheaths and relative perforating potential [Carter, Blackshear, Gravenstein], A1008
  - superfused canine saphenous, altered release and metabolism of norepinephrine in, in presence of halothane and/or hypoxia [Kamath, Rorie, Tyce], A557
  - vascular wall, absorption of local anesthetics via: *In Vitro* study [Tambakis, Tadoori, Lovett, Doss, Pillalamari, Chaudhry, Gintautas, Abadir], A768
- Ventilation. See also under Monitoring**
- airway pressure**
- pediatric, optimal release time during [Martin, Wetzel], A263
- apnea**
- infant apnea detection after herniorrhaphy [Bell, Dubose, Seashore, Touloukian, Oh, Hughes], A1047
  - postoperative, in infants, observation of [Naylor, Radharkrishnan, Thisted, McLaughlin], A955
- artificial**
- controlled, new rebreathing circuit for [In-nami, Okada, Koshimizu], A133
- continuous positive pressure**
- respiratory distress treated by, through nasal mask in hematologic patients [Tognet, Mercatello, Coronel, Polo, Devaux, Bret, Archimbaud, Fiere, Moskovtchenko], A252
- depression, alfentanil-induced, not affected by ondansetron [Dershwitz, Di Biase, Rosow, Wilson], A321
- differential effects of ketamine and thiamylal on respiratory muscles of larynx in dogs [Iwasaki, Namiki, Omomte, Yamakage, Yamasawa], A115
- high frequency**
- continuous and accurate end-tidal CO<sub>2</sub> and anesthetic concentration measurements at [Perkins, Marsh], A486
  - percutaneous transtracheal, for endoscopic examination: hemodynamic and respiratory effects [Nakatsuka, Thomas], A117
- jet**
- effective, can anesthesia machine flush valve provide for? [Gaughan, Benumof, Ozaki], A130
  - quantification of jet function of jet stylet [Gaughan, Benumof, Ozaki], A119
- limit of diaphragm activation during resistive breathing [Goldman, Walsh, Romano, Comtois, Grassino], A124
- loss of hypoxic ventilatory response following bilateral modified radical neck dissection [Moorthy, Sullivan, Fallon, Dierdorf, Radpour], A1099
- mandatory rate, during weaning period [Bachman, Viale, Annat, Delafosse, Motin], A253
- mechanical**
- controlled, automated determination of pressure volume relation of lung as guide for respirator adjustment during [Putensen, Baum, Hormann], A1015
  - prevention of nosocomial lung infection in: selective decontamination *versus* endotracheal administration of aminoglycoside antibiotic [Bach, Bohrer, Geiss, Martin], A1013
- not depressed by ketorolac, in rats [Rich, Schacterle, Moscicki, DiFazio, Adams], A769
- pattern**
- monitoring hyperventilation of head injury patients, capnography for [Liu, Leighton, Caron, McBride, Bongard], A249
  - respiratory pattern and function in neonate, effect of branched-chain amino acid supplementation on [Blazer, Reinersman, Askanazi, Hollinger, Kvetan, Katz, Fleischman], A1093
  - respiratory waveforms recognition using artificial neural-networks systems [Leon, Lorini], A492
- perfluorochemical, halothane anesthesia during [Kimless-Garber, Wolfson, Carlsson, Shaffer], A361
- pressure support, to decrease work of breathing imposed by pediatric endotracheal tubes [Gullahorn, Banner, Berman], A256
- respiratory effects of fentanyl transdermal delivery system compared to fixed interval IM morphine following spinal surgery [Torjman, Bartkowski, Marr, Lessin, Boerner], A1101
- respiratory effects of IV morphine infusion in infants and toddlers following cardiac surgery [Lynn, Opheim, Nespeca, Slattery], A952
- time course of ventilatory depression following propofol and thiopental [Gross, Conard, Blouin], A1095
- transtracheal**
- low and high flow tracheal insufflation of O<sub>2</sub> supports oxygenation in apneic dogs after TTX poisoning [Mackenzie, Barnas, Smalley, Park, Miller], A284
  - percutaneous high frequency, for endoscopic examination: hemodynamic and respiratory effects [Nakatsuka, Thomas], A117
  - validation of breath-by-breath method for measuring respiratory quotient [Hoffman, Torres, Sportiello, Forster], A131
- ventilation and ventilatory depression produced by alfentanil, effect of clonidine on, in volunteers [Jarvis, Duncan, Segal, Maze], A982
- ventilatory response at four levels of sustained hypoxia [Temp, Bigoni, Ward], A1098
- ventilatory response to hypoxia in awake and anesthetized humans [Sjorgren, Ebberyd, Sollevi, Lindahl], A1102
- Ventilators. See under Equipment**
- Ventilatory response. See under Carbon dioxide**
- Ventricles. See under Heart**
- Verapamil. See under Heart; Pharmacology**
- Volatile anesthetics. See Anesthetics, volatile**
- Vomiting**
- after alfentanil—effect of dosing method [Okum, Colonna-Romano, Horrow], A2
- antiemetics**
- droperidol, addition of, to PCA monitoring sulfate reduces nausea and vomiting [Freedman, Kreitzer, Atlin, Reuben, Eisenkraft], A668
  - droperidol alone ineffective as, for minor gynecological outpatient anesthesia [Palot, Pety, Visseaux, Botmans, Rending], A36
  - droperidol, effect of, on SSEPS [Conroy, Bailey, Baker], A193
  - droperidol and vomiting after pediatric strabismus repair, P6 acupuncture [Yentis, Bissonnette], A3
  - efficacy of prophylactic metoclopramide for cesarean delivery [Lussos, Bader, Thornhill, Datta], A1081
  - evaluation of droperidol, perphenazine and metoclopramide for prophylaxis of emetic symptoms after major gynecological surgery [DeSilva, McDonald, Darvish, Cronin, Earabino, Weerasooriya], A35
  - nicotinic mechanism may underlie antiemetic properties of phenothiazines [Dodson, Braswell], A636
  - psychomotor effects of IV ondansetron in female outpatients [Pearson, From, Ostman, Demetron, Anderson, Forbes, Joslyn], A8
  - sustained release prochlorperazine for prevention of nausea and vomiting in surgical outpatients [Young, Kitz, Conahan, Aukburg, Lecky], A4
- impact of pain and, postoperative mood assessment in surgical outpatients [Young, Kitz, Conahan, Aukburg, Lecky], A5

## nausea

chemotherapy-induced, propofol for prevention of, in pediatric cancer patients [Scher, McDowall, Barst], A1050  
droperidol alone is ineffective as antiemetic for minor gynecological outpatient anesthesia [Palot, Pety, Visseaux, Botmans, Rendoing], A36  
effect of antiemetic doses of droperidol on SSEPS [Conroy, Bailey, Baker], A193  
evaluation of droperidol, perphenazine and metaclopramide for prophylaxis of emetic symptoms after major gynecological surgery [DeSliva, McDonald, Darvish, Cronin, Earabino, Weerasooriya], A35

ketorolac superior to sufentanil, giving longer pain relief with less nausea and less recovery time after laparoscopy [Belamy, Chovan, Brose, Gunzenhauser], A29  
postoperative nystgmus and emesis [Larigani, Gratz, Berman, Zwillenberg], A1  
reduced by addition of droperidol to PCA monitoring sulfate [Freedman, Kreitzer, Adin, Reuben, Eisenkraft], A668  
not increased by nitrous oxide, in children [Splinter, Roberts, Rhine, MacNeill, Gould, Menard, Navaneelan, Komocar], A949

## X

**Xenon.** *See under Anesthetics, gases*
